# Supplementary material for: Enantioselective total synthesis of furofuran lignans via Pd-catalyzed asymmetric allylic cycloadditon of vinylethylene carbonates with 2-nitroacrylates
Source: Royal Society of Chemistry journal article supplement (doi:10.1039/d0cc05640e), 2020-01-01
Supplement: d0cc05640e1.pdf [file d0cc05640e1.pdf]

## Supporting Information

# Enantioselective Total Synthesis of Furofuran Lignans via Pd-Catalyzed Asymmetric Allylic Cycloaddition of Vinylethylene Carbonates with 2-Nitroacrylates

Can Zhao, Ijaz Khan and Yong Jian Zhang\*

School of Chemistry and Chemical Engineering, Frontiers Science Center for Transformative  
Molecules, and Shanghai Key Laboratory of Electrical Insulation and Thermal Aging,  
Shanghai Jiao Tong University, 800 Dongchuan Road, Shanghai 200240, P. R. China

E-mail: [yjian@sjtu.edu.cn](mailto:yjian@sjtu.edu.cn)

## Table of Contents

|                                                                                                                                                               |         |
|---------------------------------------------------------------------------------------------------------------------------------------------------------------|---------|
| General Experimental Details .....                                                                                                                            | S2      |
| General Procedure for Pd-Catalyzed Asymmetric Allylic Cycloaddition of Vinylethylene<br>Carbonate <b>1a</b> with 2-Nitroacrylates .....                       | S3-S3   |
| Characterization of Products <b>3</b> .....                                                                                                                   | S3-S12  |
| General Procedure for Pd-Catalyzed Asymmetric Allylic Cycloaddition of Substituted<br>Vinylethylene Carbonates <b>1</b> with 2-Nitroacrylates <b>2a</b> ..... | S12-S13 |
| Characterization of Products <b>3q</b> and <b>3r</b> .....                                                                                                    | S13-S14 |
| Scale-up Transformation .....                                                                                                                                 | S14-S14 |
| The Elaboration of Product <b>3k</b> and <b>ent-3k</b> into Furofuran Lignans .....                                                                           | S14-S25 |
| X-Rays Crystallography of <b>3i</b> and (-)-Acuminatolide .....                                                                                               | S25-S28 |
| References .....                                                                                                                                              | S29     |
| NMR charts .....                                                                                                                                              | S30-S54 |
| HPLC charts .....                                                                                                                                             | S55-S72 |

## General Experimental Details

Analytical thin-layer chromatography (TLC) was carried out using 0.2 mm commercial silica gel plates (Yantai Jiangyou Silica Gel Development Co., Ltd., silica gel HSGF 254). Preparative column chromatography employing silica gel (Qingdao Shenghai Fine Silica Gel Chemical Co., Ltd., 200-300 mesh) was performed according to the method of Still. Solvents for the chromatography are listed as volume/volume ratios. High-resolution mass spectra (HRMS) were performed at Instrumental Analysis Center of Shanghai Jiao Tong University using ESI method. Proton nuclear magnetic resonance ( $^1\text{H}$  NMR) spectra were recorded with a Bruker AVANCE III HD 400 (400MHz) (or Bruker AVANCE III HD 500 (500 MHz)) spectrometer. Chemical shifts are reported in delta ( $\delta$ ) units, parts per million (ppm) downfield from tetramethylsilane or ppm relative to the center of the singlet at 7.26 ppm for deuteriochloroform. Coupling constants are reported in Hertz (Hz). Carbon-13 nuclear magnetic resonance ( $^{13}\text{C}$  NMR) spectra were recorded with a Bruker AVANCE III HD 400 (100MHz) (or Bruker AVANCE III HD 400 (125 MHz) spectrometer. Chemical shifts are reported in delta ( $\delta$ ) units, ppm relative to the center of the triplet at 77.0 ppm for deuteriochloroform.  $^{13}\text{C}$  NMR spectra were routinely run with broadband decoupling. High performance liquid chromatography (HPLC) was performed with Thermo Fisher spectrometers and Shimazu HPLC-16 and 2030 instrument using chiral column as noted for each compound. Optical rotations were measured on a SGW<sup>®</sup>-1 polarimeter. X-ray diffraction data were collected on Bruker SMART Apex- III CMOS-Based X-ray diffractometer with Cu-K  $\alpha$  Radiation ( $\lambda = 1.54178$ ). Vinyl ethylene carbonates (H-VEC) was purchased from energy chemical. Dry 1,4-dioxane was purchased from Sigma -Aldrich.  $\text{Pd}_2(\text{dba})_3 \cdot \text{CHCl}_3$  was purchased from Sinocompound Co. and used as received. Substituted vinyl ethylene carbonates (VECs) were synthesized according to previous reported procedures.<sup>1-2</sup> Substrates **2** were facilely synthesized according to the reported literature.<sup>3</sup> All other chemicals were used as received from commercial resources.

## General Procedure for Pd-Catalyzed Asymmetric Allylic Cycloaddition of Vinyltetrahydrofuran Carbonate **1a** with 2-Nitroacrylates

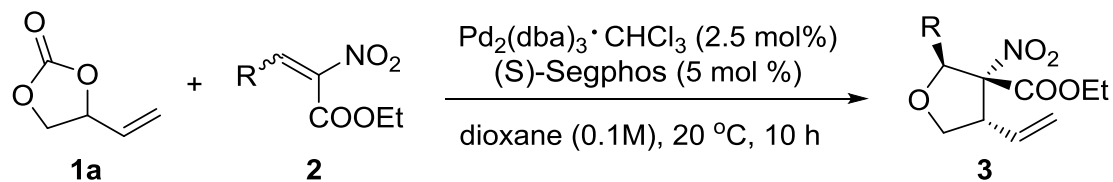

To an oven dried screw-cap reaction tube equipped with a magnetic stir bar,  $\text{Pd}_2(\text{dba})_3 \cdot \text{CHCl}_3$  (5.2 mg, 0.005 mmol, 2.5 mol%), (*S*)-Segphos (6.1 mg, 0.01 mmol, 5 mol%), **1a** (0.24 mmol) and **2** (0.2 mmol) were added. The reaction tube was sealed with rubber-septum, then evacuated and backfilled with nitrogen (this process was repeated a total of three times). Anhydrous 1,4-dioxane (2 mL) was added sequentially via syringe. The resulting mixture was stirred at 20 °C for 10 hours. The solvent was removed *in vacuo* with the aid of a rotary evaporator. The obtained residue was purified by flash column chromatography on silica gel to afford the corresponding products **3**. Diastereoisomer ratios (d.r.) were determined by  $^1\text{H}$  NMR analysis of the reaction mixture. The enantiomeric excesses of the products were determined by HPLC analysis using chiral stationary phases as indicated for each case.

### Ethyl (2*S*,3*R*,4*S*)-3-nitro-2-phenyl-4-vinyltetrahydrofuran-3-carboxylate (**3a**)

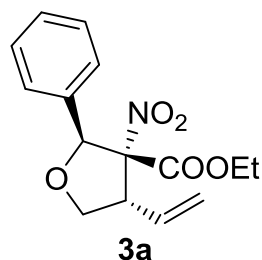

**3a** was prepared according to the general procedure. Yield: 95% (55.3 mg), d.r. = 6:1; Purification: 2:98 EtOAc : Petroleum ether; colorless oil;  $^1\text{H}$  NMR (400 MHz, Chloroform-*d*)  $\delta$  7.38–7.28 (m, 5H), 5.95 (s, 1H), 5.62 (ddd,  $J = 17.2, 10.2, 6.9$  Hz, 1H), 5.38–5.26 (m, 2H), 4.55–4.43 (m, 1H), 4.05–3.93 (m, 2H), 3.89–3.77 (m, 1H), 3.65–3.54 (m, 1H), 0.86 (t,  $J = 7.2$  Hz, 3H);  $^{13}\text{C}$  NMR (100 MHz, Chloroform-*d*)  $\delta$  163.4, 136.4, 129.5, 129.0, 128.2, 127.3, 121.4, 103.9, 85.5, 70.6, 62.7, 49.9, 13.1; HRMS (ESI-MS): Calcd. for  $\text{C}_{15}\text{H}_{17}\text{NO}_5$  ( $\text{M}+\text{Na}$ ): 314.0999, Found: 314.1003; HPLC conditions: Chiralcel Lux 5u Cellulose-2 column, 220 nm, flow rate: 0.5 mL/min, *i*-PrOH/hexanes = 5/95,  $t_{\text{minor}} = 10.60$  min,  $t_{\text{major}} = 9.94$  min; 99% ee.

**Ethyl (2*S*,3*R*,4*S*)-2-(2-methoxyphenyl)-3-nitro-4-vinyltetrahydrofuran-3-carboxylate (3b)**

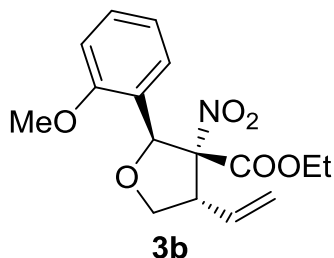

**3b** was prepared according to the general procedure. Yield: 84% (54.0 mg), d.r. = 3:1; Purification: 2:98 EtOAc : Petroleum ether; colorless oil;  $^1\text{H}$  NMR (500 MHz, Chloroform-*d*)  $\delta$  7.31–7.27 (m, 1H), 6.96–6.91 (m, 2H), 6.86–6.79 (m, 1H), 6.40 (s, 1H), 5.58 (ddd,  $J = 17.5, 10.2, 7.4$  Hz, 1H), 5.39–5.22 (m, 2H), 4.46–4.31 (m, 1H), 4.17–4.01 (m, 1H), 3.97–3.90 (m, 1H), 3.85–3.79 (m, 1H), 3.78 (s, 3H), 3.60–3.54 (m, 1H), 0.84 (t,  $J = 7.1$  Hz, 3H);  $^{13}\text{C}$  NMR (125 MHz, Chloroform-*d*)  $\delta$  163.8, 157.0, 143.3, 129.9, 129.2, 128.9, 128.3, 121.5, 120.4, 110.1, 104.1, 70.0, 62.4, 55.2, 51.0, 13.1; HRMS (ESI-MS): Calcd. for  $\text{C}_{16}\text{H}_{19}\text{NO}_6$  ( $\text{M}+\text{Na}$ ): 344.1105, Found: 344.1107; HPLC conditions: Chiralcel Lux 5u Cellulose-2 column, 220 nm, flow rate: 0.5 mL/min, *i*-PrOH/hexanes = 5/95,  $t_{\text{minor}} = 14.44$  min,  $t_{\text{major}} = 12.39$  min; 97% ee.

**Ethyl (2*S*,3*R*,4*S*)-2-(3-methoxyphenyl)-3-nitro-4-vinyltetrahydrofuran-3-carboxylate (3c)**

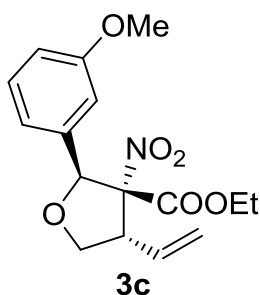

**3c** was prepared according to the general procedure. Yield: 88% (56.5 mg), d.r. = 9:1; Purification: 2:98 EtOAc : Petroleum ether; colorless oil;  $^1\text{H}$  NMR (500 MHz, Chloroform-*d*)  $\delta$  7.26–7.20 (m, 1H), 6.93–6.87 (m, 1H), 6.86–6.80 (m, 2H), 5.92 (s, 1H), 5.61 (ddd,  $J = 17.3, 10.2, 7.0$  Hz, 1H), 5.40–5.20 (m, 2H), 4.52–4.44 (m, 1H), 4.03–3.92 (m, 2H), 3.91–3.83 (m, 1H), 3.79 (s, 3H), 3.70–3.61 (m, 1H), 0.89 (t,  $J = 7.2$  Hz, 3H);  $^{13}\text{C}$  NMR (125 MHz, Chloroform-*d*)  $\delta$  163.4, 159.4, 137.9, 129.5, 129.2, 121.4, 119.6, 114.5, 112.9, 103.9, 85.3,

70.6, 62.7, 55.2, 49.9, 13.1; HRMS (ESI-MS): Calcd. for C<sub>16</sub>H<sub>19</sub>NO<sub>6</sub> (M+Na): 344.1105, Found: 344.1103; HPLC conditions: Chiralcel Lux 5u Cellulose-2 column, 220 nm, flow rate: 0.5 mL/min, *i*-PrOH/hexanes = 5/95, *t*<sub>minor</sub> = 14.27 min, *t*<sub>major</sub> = 14.95 min; 99% ee.

**Ethyl (2*S*,3*R*,4*S*)-2-(4-methoxyphenyl)-3-nitro-4-vinyltetrahydrofuran-3-carboxylate (3d)**

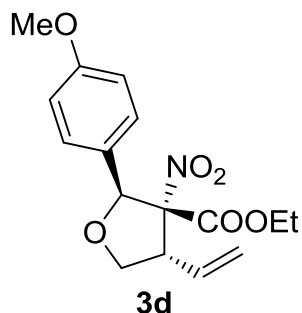

**3d** was prepared according to the general procedure. Yield: 85% (54.6 mg), d.r. = 9:1; Purification: 2:98 EtOAc : Petroleum ether; colorless oil; <sup>1</sup>H NMR (400 MHz, Chloroform-*d*) δ 7.25–7.19 (m, 2H), 6.88–6.81 (m, 2H), 5.91 (s, 1H), 5.61 (ddd, *J* = 17.2, 10.2, 7.0 Hz, 1H), 5.38–5.25 (m, 2H), 4.52–4.42 (m, 1H), 4.02–3.93 (m, 2H), 3.93–3.83 (m, 1H), 3.81–3.79 (s, 3H), 3.70–3.60 (m, 1H), 0.91 (t, *J* = 7.2 Hz, 3H); <sup>13</sup>C NMR (125 MHz, Chloroform-*d*) δ 163.5, 160.1, 129.5, 128.6, 128.4, 121.3, 113.5, 103.9, 85.3, 70.3, 62.6, 55.2, 49.8, 13.2; HRMS (ESI-MS): Calcd. for C<sub>16</sub>H<sub>19</sub>NO<sub>6</sub> (M+Na): 344.1105, Found: 344.1105; HPLC conditions: Chiralcel Lux 5u Cellulose-2 column, 220 nm, flow rate: 0.5 mL/min, *i*-PrOH/hexanes = 1/99, *t*<sub>minor</sub> = 41.74 min, *t*<sub>major</sub> = 37.95 min; 99% ee.

**Ethyl (2*S*,3*R*,4*S*)-3-nitro-2-(*p*-tolyl)-4-vinyltetrahydrofuran-3-carboxylate (3e)**

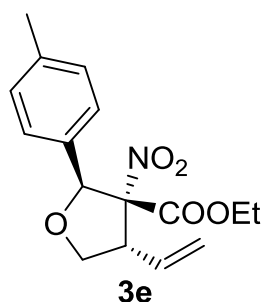

**3e** was prepared according to the general procedure. Yield: 91% (55.5 mg), d.r. = 5:1; Purification: 2:98 EtOAc : Petroleum ether; colorless oil; <sup>1</sup>H NMR (400 MHz, Chloroform-*d*) δ 7.22–7.16 (m, 2H), 7.15–7.10 (m, 2H), 5.92 (s, 1H), 5.61 (ddd, *J* = 17.2, 10.2, 6.9 Hz, 1H),

5.34–5.26 (m, 2H), 4.53–4.41 (m, 1H), 4.03–3.92 (m, 2H), 3.90–3.80 (m, 1H), 3.68–3.57 (m, 1H), 2.32 (s, 3H), 0.89 (t,  $J = 7.2$  Hz, 3H);  $^{13}\text{C}$  NMR (100 MHz, Chloroform- $d$ )  $\delta$  163.4, 138.9, 133.4, 129.5, 128.8, 127.2, 121.3, 104.0, 85.5, 70.4, 62.6, 49.8, 21.1, 13.1; HRMS (ESI-MS): Calcd. for  $\text{C}_{16}\text{H}_{19}\text{NO}_5$  ( $\text{M}+\text{Na}$ ): 328.1155, Found: 328.1156; HPLC conditions: Chiralcel Lux 5u Cellulose-2 column, 220 nm, flow rate: 0.5 mL/min,  $i$ -PrOH/hexanes = 5/95,  $t_{\text{minor}} = 11.09$  min,  $t_{\text{major}} = 9.79$  min; 99% ee.

**Ethyl (2*S*,3*R*,4*S*)-2-(3-chlorophenyl)-3-nitro-4-vinyltetrahydrofuran-3-carboxylate (3f)**

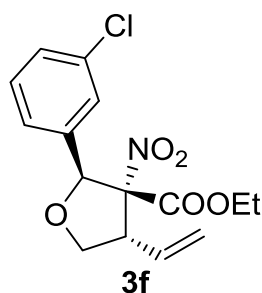

**3f** was prepared according to the general procedure. Yield 94% (61.2 mg), d.r. = 9:1; Purification: 2:98 EtOAc : Petroleum ether; colorless oil;  $^1\text{H}$  NMR (400 MHz, Chloroform- $d$ )  $\delta$  7.37–7.18 (m, 4H), 5.92 (s, 1H), 5.61 (ddd,  $J = 17.2, 10.3, 7.0$  Hz, 1H), 5.39–5.24 (m, 2H), 4.56–4.44 (m, 1H), 4.03–3.93 (m, 2H), 3.94–3.86 (m, 1H), 3.76–3.64 (m, 1H), 0.93 (t,  $J = 7.2$  Hz, 3H);  $^{13}\text{C}$  NMR (100 MHz, Chloroform- $d$ )  $\delta$  163.2, 138.4, 134.2, 129.5, 129.3, 129.1, 127.5, 125.5, 121.7, 103.6, 84.5, 70.8, 62.9, 49.9, 13.1; HRMS (ESI-MS): Calcd. for  $\text{C}_{15}\text{H}_{16}\text{ClNO}_5$  ( $\text{M}+\text{Na}$ ): 348.0609, Found: 348.0611; HPLC conditions: Chiralcel Lux 5u Cellulose-2 column, 220 nm, flow rate: 0.5 mL/min,  $i$ -PrOH/hexanes = 5/95,  $t_{\text{minor}} = 9.40$  min,  $t_{\text{major}} = 8.88$  min; 98% ee.

**Ethyl (2*S*,3*R*,4*S*)-2-(3-bromophenyl)-3-nitro-4-vinyltetrahydrofuran-3-carboxylate (3g)**

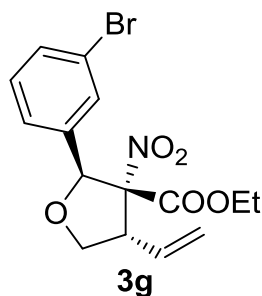

**3g** was prepared according to the general procedure. Yield 90% (66.6 mg), d.r. = 9:1;

Purification: 2:98 EtOAc : Petroleum ether; colorless oil;  $^1\text{H}$  NMR (400 MHz, Chloroform-*d*)  $\delta$  7.52–7.40 (m, 2H), 7.33–7.17 (m, 2H), 5.91 (s, 1H), 5.61 (ddd,  $J = 17.6, 10.3, 7.0$  Hz, 1H), 5.38–5.26 (m, 2H), 4.55–4.44 (m, 1H), 4.03–3.92 (m, 2H), 3.91–3.85 (m, 1H), 3.75–3.65 (m, 1H), 0.94 (t,  $J = 7.2$  Hz, 3H);  $^{13}\text{C}$  NMR (100 MHz, Chloroform-*d*)  $\delta$  163.2, 138.6, 132.1, 130.4, 129.8, 129.3, 125.9, 122.2, 121.7, 103.6, 84.4, 70.8, 62.9, 49.9, 13.2; HRMS (ESI-MS): Calcd. for  $\text{C}_{15}\text{H}_{16}\text{BrNO}_5$  ( $\text{M}+\text{Na}$ ): 392.0104, Found: 392.0106; HPLC conditions: Chiralcel Lux 5u Cellulose-2 column, 220 nm, flow rate: 0.5 mL/min, *i*-PrOH/hexanes = 5/95,  $t_{\text{minor}} = 9.75$  min,  $t_{\text{major}} = 9.21$  min; 96% ee.

**Ethyl (2*S*,3*R*,4*S*)-3-nitro-2-(4-(trifluoromethyl)phenyl)-4-vinyltetrahydrofuran-3-carboxylate (3h)**

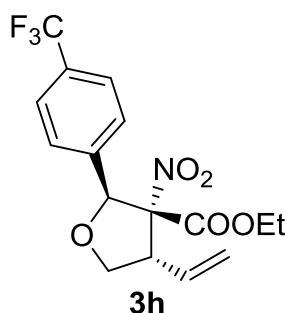

**3h** was prepared according to the general procedure. Yield 97% (69.7 mg), d.r. = 20:1; Purification: 2:98 EtOAc : Petroleum ether; colorless oil;  $^1\text{H}$  NMR (400 MHz, Chloroform-*d*)  $\delta$  7.65–7.55 (m, 2H), 7.52–7.40 (m, 2H), 6.01 (s, 1H), 5.63 (ddd,  $J = 17.3, 10.1, 7.0$  Hz, 1H), 5.39–5.19 (m, 2H), 4.61–4.41 (m, 1H), 4.05–3.91 (m, 2H), 3.92–3.77 (m, 1H), 3.70–3.51 (m, 1H), 0.83 (t,  $J = 7.2$  Hz, 3H);  $^{13}\text{C}$  NMR (100 MHz, Chloroform-*d*)  $\delta$  163.3, 140.3, 129.4, 129.4, 127.7, 125.1, 125.1, 121.8, 103.5, 84.4, 71.0, 62.9, 50.2, 13.0;  $^{19}\text{F}$  NMR (376 MHz, Chloroform-*d*)  $\delta$  -62.77; HRMS (ESI-MS): Calcd. for  $\text{C}_{16}\text{H}_{16}\text{F}_3\text{NO}_5$  ( $\text{M}+\text{Na}$ ): 382.0873, Found: 382.0872; HPLC conditions: Chiralcel Lux 5u Cellulose-2 column, 220 nm, flow rate: 0.5 mL/min, *i*-PrOH/hexanes = 5/95,  $t_{\text{minor}} = 8.53$  min,  $t_{\text{major}} = 8.23$  min; 99% ee.

**Ethyl (2*S*,3*R*,4*S*)-2-(3,4-dimethoxyphenyl)-3-nitro-4-vinyltetrahydrofuran-3-carboxylate (3i)**

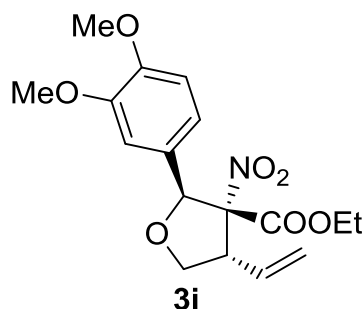

**3i** was prepared according to the general procedure. Yield 86% (60.4 mg), d.r. = 8:1; Purification: 2:10 EtOAc : Petroleum ether; white solid; <sup>1</sup>H NMR (500 MHz, Chloroform-*d*) δ 6.94–6.87 (m, 1H), 6.85–6.78 (m, 2H), 5.90 (s, 1H), 5.62 (ddd, *J* = 17.4, 10.3, 7.0 Hz, 1H), 5.39–5.25 (m, 2H), 4.52–4.44 (m, 1H), 4.03–3.92 (m, 3H), 3.87 (s, 6H), 3.70–3.60 (m, 1H), 0.90 (t, *J* = 7.2 Hz, 3H); <sup>13</sup>C NMR (125 MHz, Chloroform-*d*) δ 163.6, 149.5, 148.6, 129.6, 128.6, 121.4, 120.0, 110.6, 110.2, 103.9, 85.4, 70.4, 62.7, 55.9, 50.0, 13.3; HRMS (ESI-MS): Calcd. for C<sub>17</sub>H<sub>21</sub>NO<sub>7</sub> (M+Na): 374.1210, Found: 374.1208; HPLC conditions: Chiralcel AD-H column, 220 nm, flow rate: 1 mL/min, *i*-PrOH/hexanes = 2/98, *t*<sub>minor</sub> = 29.92 min, *t*<sub>major</sub> = 36.46 min; >99% ee.

**Ethyl (2*S*,3*R*,4*S*)-2-(3,5-dimethoxyphenyl)-3-nitro-4-vinyltetrahydrofuran-3-carboxylate (3j)**

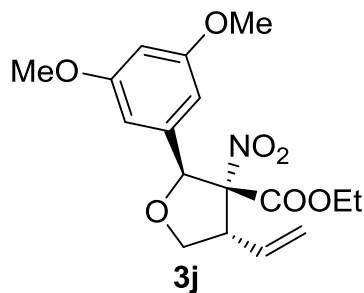

**3j** was prepared according to the general procedure. Yield 81% (56.9 mg), d.r. = 8:1; Purification: 1:10 EtOAc : Petroleum ether; colorless oil; <sup>1</sup>H NMR (500 MHz, Chloroform-*d*) δ 6.50–6.44 (m, 2H), 6.42–6.38 (m, 1H), 5.88 (s, 1H), 5.61 (ddd, *J* = 17.4, 10.2, 7.0 Hz, 1H), 5.34–5.25 (m, 2H), 4.51–4.44 (m, 1H), 4.01–3.94 (m, 2H), 3.94–3.87 (m, 1H), 3.77 (s, 6H), 3.75–3.67 (m, 1H), 0.93 (t, *J* = 7.2 Hz, 3H); <sup>13</sup>C NMR (125 MHz, Chloroform-*d*) δ 163.4, 160.6, 138.6, 129.5, 121.4, 105.3, 103.8, 100.9, 85.3, 70.6, 62.7, 55.3, 49.9, 13.2; HRMS (ESI-MS): Calcd. for C<sub>17</sub>H<sub>21</sub>NO<sub>7</sub> (M+Na): 374.1210, Found: 374.1207; HPLC conditions:



Chiralcel Lux 5u Cellulose-2 column, 220 nm, flow rate: 0.5 mL/min, *i*-PrOH/hexanes = 5/95,  $t_{\text{minor}} = 22.20$  min,  $t_{\text{major}} = 36.70$  min; 98% ee.

**Ethyl (2*S*,3*R*,4*S*)-2-(benzo[*d*][1,3]dioxol-5-yl)-3-nitro-4-vinyltetrahydrofuran-3-carboxylate (3k)**

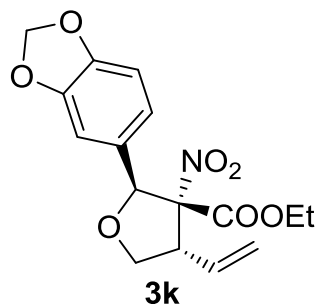

**3k** was prepared according to the general procedure. Yield 91% (61.0 mg), d.r. = 10:1; Purification: 2:98 EtOAc : Petroleum ether; colorless oil;  $^1\text{H}$  NMR (500 MHz, Chloroform-*d*)  $\delta$  6.83–6.73 (m, 3H), 5.95 (s, 2H), 5.85 (s, 1H), 5.60 (ddd,  $J = 17.2, 10.3, 7.0$  Hz, 1H), 5.38–5.26 (m, 2H), 4.49–4.42 (m, 1H), 4.01–3.87 (m, 3H), 3.82–3.70 (m, 1H), 0.98 (t,  $J = 7.2$  Hz, 3H);  $^{13}\text{C}$  NMR (125 MHz, Chloroform-*d*)  $\delta$  163.4, 148.0, 147.5, 130.1, 129.4, 121.4, 121.2, 107.9, 107.6, 103.8, 101.2, 85.2, 70.3, 62.7, 49.7, 13.3; HRMS (ESI-MS): Calcd. for  $\text{C}_{16}\text{H}_{17}\text{NO}_7$  ( $\text{M}+\text{Na}$ ): 358.0897, Found: 358.0896; HPLC conditions: Chiralcel Lux 5u Cellulose-2 column, 220 nm, flow rate: 0.5 mL/min, *i*-PrOH/hexanes = 5/95,  $t_{\text{minor}} = 20.74$  min,  $t_{\text{major}} = 19.39$  min; 97% ee.

**Ethyl (2*S*,3*R*,4*S*)-3-nitro-2-(6-nitrobenzo[*d*][1,3]dioxol-5-yl)-4-vinyltetrahydrofuran-3-carboxylate (3l)**

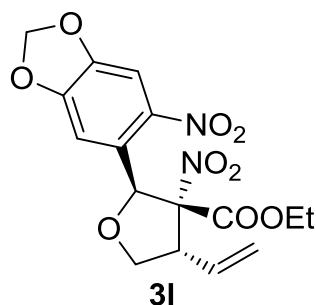

**3l** was prepared according to the general procedure. Yield 86% (65.4 mg), d.r. = 6:1; Purification: 2:98 EtOAc : Petroleum ether; colorless oil;  $^1\text{H}$  NMR (500 MHz, Chloroform-*d*)  $\delta$  7.62 (s, 1H), 7.12 (s, 1H), 6.82 (s, 1H), 6.15 (s, 2H), 5.55 (ddd,  $J = 17.0, 10.4, 6.7$  Hz, 1H),

5.41–5.24 (m, 2H), 4.51–4.33 (m, 1H), 4.07–3.88 (m, 3H), 3.80–3.65 (m, 1H), 0.96 (t,  $J = 7.2$  Hz, 3H);  $^{13}\text{C}$  NMR (125 MHz, Chloroform- $d$ )  $\delta$  163.4, 152.2, 148.1, 142.2, 129.7, 128.2, 122.3, 107.6, 105.4, 103.6, 103.3, 81.9, 69.7, 63.0, 51.6, 13.2; HRMS (ESI-MS): Calcd. for  $\text{C}_{16}\text{H}_{16}\text{N}_2\text{O}_9$  (M+Na): 403.0748, Found: 403.0753; HPLC conditions: Chiralcel OD-H column, 220 nm, flow rate: 1 mL/min,  $i$ -PrOH/hexanes = 8/92,  $t_{\text{minor}} = 20.17$  min,  $t_{\text{major}} = 15.72$  min; 98% ee.

**Ethyl (2*S*,3*R*,4*S*)-2-(naphthalen-2-yl)-3-nitro-4-vinyltetrahydrofuran-3-carboxylate (3m)**

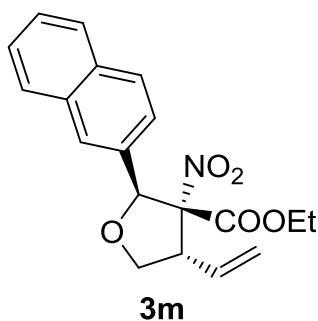

**3m** was prepared according to the general procedure. Yield 93% (63.5 mg), d.r. = 13:1; Purification: 2:98 EtOAc : Petroleum ether; colorless oil;  $^1\text{H}$  NMR (400 MHz, Chloroform- $d$ )  $\delta$  7.88–7.75 (m, 4H), 7.53–7.45 (m, 2H), 7.43–7.35 (m, 1H), 6.13 (s, 1H), 5.65 (ddd,  $J = 17.2, 10.3, 6.8$  Hz, 1H), 5.41–5.28 (m, 2H), 4.63–4.50 (m, 1H), 4.14–3.98 (m, 2H), 3.80–3.65 (m, 1H), 3.50–3.40 (m, 1H), 0.66 (t,  $J = 7.2$  Hz, 3H);  $^{13}\text{C}$  NMR (100 MHz, Chloroform- $d$ )  $\delta$  163.4, 133.7, 133.5, 132.7, 129.5, 128.0, 127.9, 127.6, 126.9, 126.6, 126.4, 124.4, 121.5, 103.9, 85.6, 70.7, 62.6, 50.0, 12.9; HRMS (ESI-MS): Calcd. for  $\text{C}_{19}\text{H}_{19}\text{NO}_5$  (M+Na): 364.1155, Found: 364.1157; HPLC conditions: Chiralcel Lux 5u Cellulose-2 column, 220 nm, flow rate: 0.5 mL/min,  $i$ -PrOH/hexanes = 5/95,  $t_{\text{minor}} = 13.80$  min,  $t_{\text{major}} = 12.26$  min; 99% ee.

**Ethyl (2*S*,3*R*,4*S*)-2-(naphthalen-1-yl)-3-nitro-4-vinyltetrahydrofuran-3-carboxylate (3n)**

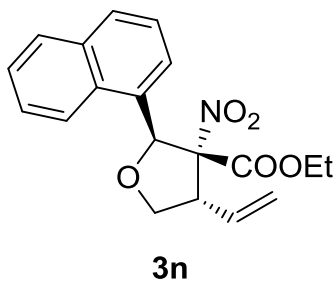

**3n** was prepared according to the general procedure. Yield 83% (58.7 mg), d.r. = 2.2:1; Purification: 2:98 EtOAc : Petroleum ether; colorless oil; Major-diastereomer:  $^1\text{H}$  NMR (400

MHz, Chloroform-*d*)  $\delta$  7.95 (d,  $J = 8.2$  Hz, 1H), 7.88–7.78 (overlapped, 2H), 7.64–7.57 (m, 1H), 7.54–7.42 (overlapped, 3H), 6.96 (s, 1H), 5.61 (ddd,  $J = 17.4, 10.3, 7.0$  Hz, 1H), 5.42–5.26 (overlapped, 2H), 4.54–4.43 (m, 2H), 4.05 (dd,  $J = 11.5, 8.6$  Hz, 1H), 3.60–3.40 (overlapped, 1H), 3.05–2.87 (m, 1H), 0.20 (t,  $J = 7.1$  Hz, 3H); Minor-diastereomer:  $^1\text{H}$  NMR (400 MHz, Chloroform-*d*)  $\delta$  8.17 (d,  $J = 8.4$  Hz, 1H), 7.88–7.78 (overlapped, 2H), 7.64–7.57 (m, 1H), 7.54–7.42 (overlapped, 3H), 6.94 (s, 1H), 6.15 (ddd,  $J = 17.4, 8.8, 7.5$  Hz, 1H), 5.42–5.26 (overlapped, 2H), 4.20–4.12 (m, 2H), 3.85–3.76 (m, 1H), 3.60–3.40 (overlapped, 1H), 3.25–3.15 (m, 1H), 0.40 (t,  $J = 7.2$  Hz, 3H);  $^{13}\text{C}$  NMR (100 MHz, Chloroform-*d*)  $\delta$  133.3, 132.6, 131.2, 130.7, 129.4, 129.3, 128.9, 128.6, 126.4, 125.7, 125.7, 125.4, 125.1, 125.0, 124.9, 123.5, 123.4, 121.6, 121.4, 104.7, 82.5, 82.0, 72.7, 69.9, 62.3, 62.2, 56.2, 51.0, 12.6, 12.2; HRMS (ESI-MS): Calcd. for  $\text{C}_{19}\text{H}_{19}\text{NO}_5$  ( $\text{M}+\text{Na}$ ): 364.1155, Found: 364.1157; HPLC conditions: Chiralcel Lux 5u Cellulose-2 column, 220 nm, flow rate: 0.5 mL/min, *i*-PrOH/hexanes = 5/95,  $t_{\text{minor}} = 10.46$  min,  $t_{\text{major}} = 10.04$  min; 97% ee.

**Ethyl (2*S*,3*R*,4*S*)-3-nitro-2-(thiophen-3-yl)-4-vinyltetrahydrofuran-3-carboxylate (3o)**

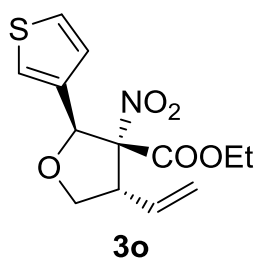

**3o** was prepared according to the general procedure. Yield 86% (51.1 mg), d.r. = 9:1; Purification: 2:98 EtOAc : Petroleum ether; colorless oil;  $^1\text{H}$  NMR (400 MHz, Chloroform-*d*)  $\delta$  7.35–7.19 (m, 2H), 7.01 (dd,  $J = 5.0, 1.4$  Hz, 1H), 6.02 (s, 1H), 5.63 (ddd,  $J = 17.4, 10.2, 7.1$  Hz, 1H), 5.42–5.23 (m, 2H), 4.55–4.40 (m, 1H), 4.06–3.84 (m, 3H), 3.83–3.65 (m, 1H), 0.97 (t,  $J = 7.2$  Hz, 3H);  $^{13}\text{C}$  NMR (100 MHz, Chloroform-*d*)  $\delta$  163.5, 137.5, 129.6, 126.2, 125.9, 124.1, 121.4, 103.2, 81.5, 70.4, 62.8, 49.7, 13.3; HRMS (ESI-APCI): Calcd. for  $\text{C}_{13}\text{H}_{15}\text{NO}_5\text{S}$  ( $\text{M}+\text{Na}$ ): 320.0563, Found: 320.0565; HPLC conditions: Chiralcel Lux 5u Cellulose-2 column, 220 nm, flow rate: 0.5 mL/min, *i*-PrOH/hexanes = 5/95,  $t_{\text{minor}} = 12.85$  min,  $t_{\text{major}} = 11.66$  min; 98% ee.

**Ethyl (2*S*,3*R*,4*S*)-3-nitro-2-((*E*)-styryl)-4-vinyltetrahydrofuran-3-carboxylate (3p)**

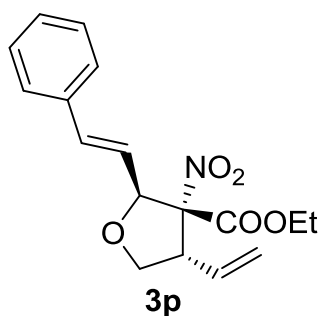

**3p** was prepared according to the general procedure. Yield 87% (55.2 mg), d.r. = 20:1; Purification: 2:98 EtOAc : Petroleum ether; colorless oil;  $^1\text{H}$  NMR (400 MHz, Chloroform-*d*)  $\delta$  7.44–7.29 (m, 5H), 6.77 (dd,  $J = 15.8, 1.3$  Hz, 1H), 6.03 (dd,  $J = 15.8, 7.0$  Hz, 1H), 5.65 (ddd,  $J = 17.4, 10.3, 7.2$  Hz, 1H), 5.50 (dd,  $J = 7.1, 1.2$  Hz, 1H), 5.41–5.26 (m, 2H), 4.47–4.34 (m, 1H), 4.22 (q,  $J = 7.2$  Hz, 2H), 3.98–3.82 (m, 2H), 1.18 (t,  $J = 7.1$  Hz, 3H);  $^{13}\text{C}$  NMR (100 MHz, Chloroform-*d*)  $\delta$  163.4, 135.5, 134.8, 129.5, 128.6, 128.4, 126.7, 122.9, 121.4, 102.6, 83.4, 70.2, 63.0, 49.2, 13.8; HRMS (ESI-MS): Calcd. for  $\text{C}_{17}\text{H}_{19}\text{NO}_5$  (M+Na): 340.1155, Found: 340.1165; HPLC conditions: Chiralcel Lux 5u Cellulose-2 column, 220 nm, flow rate: 0.5 mL/min, *i*-PrOH/hexanes = 5/95,  $t_{\text{minor}} = 12.35$  min,  $t_{\text{major}} = 11.13$  min; 99% ee.

**General Procedure for Pd-Catalyzed Asymmetric Allylic Cycloaddition of Substituted Vinylethylene Carbonates **1** with 2-Nitroacrylate **2a****

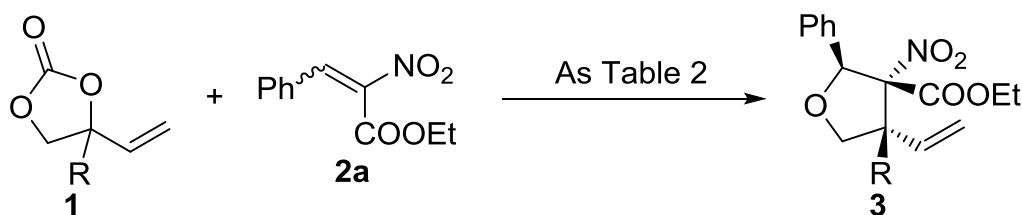

**3q**, R = Me, 78% yield, 20:1 dr, 95% ee

**3r**, R = Ph, 73% yield, 20:1 dr, 96% ee

To an oven dried screw-cap reaction tube equipped with a magnetic stir bar,  $\text{Pd}_2(\text{dba})_3 \cdot \text{CHCl}_3$  (5.2 mg, 0.005 mmol, 2.5 mol%), (*S*)-Segphos (6.1 mg, 0.01 mmol, 5 mol%), **1** (0.24 mmol) and **2a** (0.2 mmol) were added. The reaction tube was sealed with rubber-septum, then evacuated and backfilled with nitrogen (this process was repeated a total of three times). Anhydrous 1,4-dioxane (2 mL) was added sequentially via syringe. The resulting mixture was stirred at 20 °C for 20 hours. The solvent was removed *in vacuo* with the aid of a rotary

evaporator. The obtained residue was purified by flash column chromatography on silica gel to afford the corresponding products **3**. Diastereoisomer ratios (d.r.) were determined by  $^1\text{H}$  NMR analysis of the reaction mixture. The enantiomeric excesses of the products were determined by HPLC analysis using chiral stationary phases as indicated for each case.

**Ethyl (2*S*,3*R*,4*S*)-4-methyl-3-nitro-2-phenyl-4-vinyltetrahydrofuran-3-carboxylate (**3q**)**

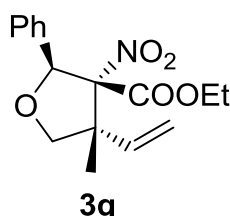

**3q** was prepared according to the general procedure. Yield: 78% (47.6 mg), d.r. = 20:1; Purification: 2:98 EtOAc : Petroleum ether; colorless oil;  $^1\text{H}$  NMR (400 MHz, Chloroform-*d*)  $\delta$  7.56–7.47 (m, 2H), 7.34–7.27 (m, 3H), 6.05 (s, 1H), 5.99 (dd,  $J = 17.3, 10.7$  Hz, 1H), 5.55–5.33 (m, 2H), 4.62 (d,  $J = 8.2$  Hz, 1H), 4.24 (d,  $J = 8.2$  Hz, 1H), 3.79–3.70 (m, 1H), 3.67–3.53 (m, 1H), 1.51 (s, 3H), 0.78 (t,  $J = 7.2$  Hz, 3H);  $^{13}\text{C}$  NMR (100 MHz, Chloroform-*d*)  $\delta$  163.2, 138.5, 136.4, 128.5, 127.9, 127.0, 118.0, 103.7, 81.9, 77.5, 62.5, 53.0, 16.3, 13.2; HRMS (ESI-MS): Calcd. for  $\text{C}_{16}\text{H}_{19}\text{NO}_5$  ( $\text{M}+\text{Na}$ ): 328.1155, Found: 328.1156; HPLC conditions: Chiralcel Lux 5u Cellulose-2 column, 220 nm, flow rate: 0.5 mL/min, *i*-PrOH/hexanes = 5/95,  $t_{\text{minor}} = 6.29$  min,  $t_{\text{major}} = 8.00$  min; 95% ee.

**Ethyl (2*S*,3*R*,4*R*)-3-nitro-2,4-diphenyl-4-vinyltetrahydrofuran-3-carboxylate (**3r**)**

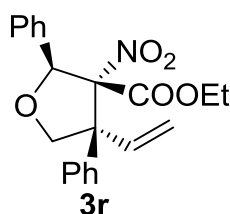

**3r** was prepared according to the general procedure. Yield: 73% (53.6 mg), d.r. = 20:1; Purification: 2:98 EtOAc : Petroleum ether; colorless oil;  $^1\text{H}$  NMR (400 MHz, Chloroform-*d*)  $\delta$  7.57–7.50 (m, 2H), 7.46–7.39 (m, 2H), 7.36–7.22 (m, 6H), 6.40 (s, 1H), 6.22 (dd,  $J = 17.1, 10.5$  Hz, 1H), 5.34 (d,  $J = 10.6$  Hz, 1H), 5.16 (d,  $J = 17.1$  Hz, 1H), 5.04 (d,  $J = 8.2$  Hz, 1H), 4.82 (d,  $J = 8.3$  Hz, 1H), 3.58–3.47 (m, 2H), 0.65 (t,  $J = 7.1$  Hz, 3H);  $^{13}\text{C}$  NMR (100 MHz, Chloroform-*d*)  $\delta$  163.5, 139.4, 138.5, 136.5, 128.5, 128.3, 128.0, 127.6, 127.2, 126.7, 118.6,

106.2, 83.8, 78.9, 62.6, 61.7, 12.9; HRMS (ESI-MS): Calcd. for C<sub>21</sub>H<sub>21</sub>NO<sub>5</sub> (M+Na): 390.1312, Found: 390.1307; HPLC conditions: Chiralcel Lux 5u Cellulose-2 column, 220 nm, flow rate: 0.5 mL/min, *i*-PrOH/hexanes = 5/95, *t*<sub>minor</sub> = 12.14 min, *t*<sub>major</sub> = 11.46 min; 96% ee.

### Scale-up Transformation

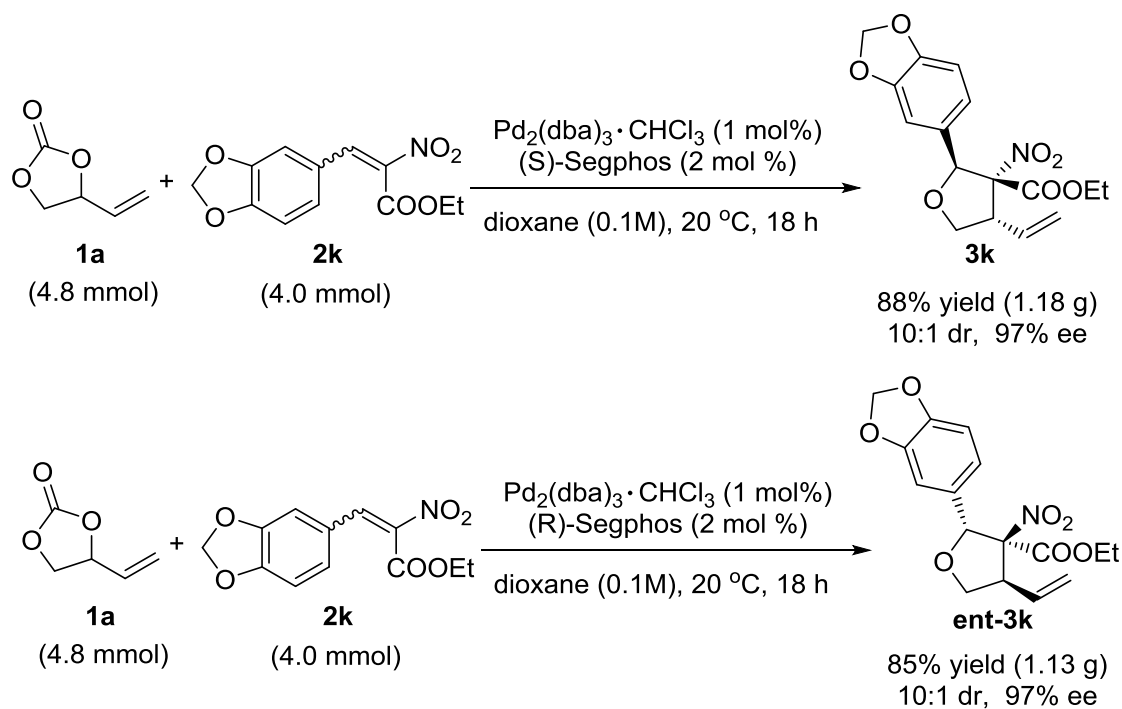

To an oven dried screw-cap reaction tube equipped with a magnetic stir bar, Pd<sub>2</sub>(dba)<sub>3</sub>·CHCl<sub>3</sub> (41.6 mg, 0.04 mmol, 1 mol%), (S)-Segphos (48.8 mg, 0.08 mmol, 2 mol%), **1a** (4.8 mmol) and **2k** (4 mmol) were added. The reaction tube was sealed with rubber-septum, then evacuated and backfilled with nitrogen (this process was repeated a total of three times). Anhydrous 1,4-dioxane (40 mL) was added sequentially via syringe. The resulting mixture was stirred at 20 °C for 18 hours. The solvent was removed *in vacuo* with the aid of a rotary evaporator. The obtained residue was purified by flash column chromatography on silica gel to afford the corresponding product **3k** in 88% yield (1.18 g) with 10:1 d.r. and 97% ee. When (R)-Segphos was used in this reaction system, the desired product **ent-3k** was provided in 85% yield (1.13 g) with 10:1 d.r. and 97% ee.

### The Elaboration of Product **3k** and **ent-3k** into Furofuran Lignans

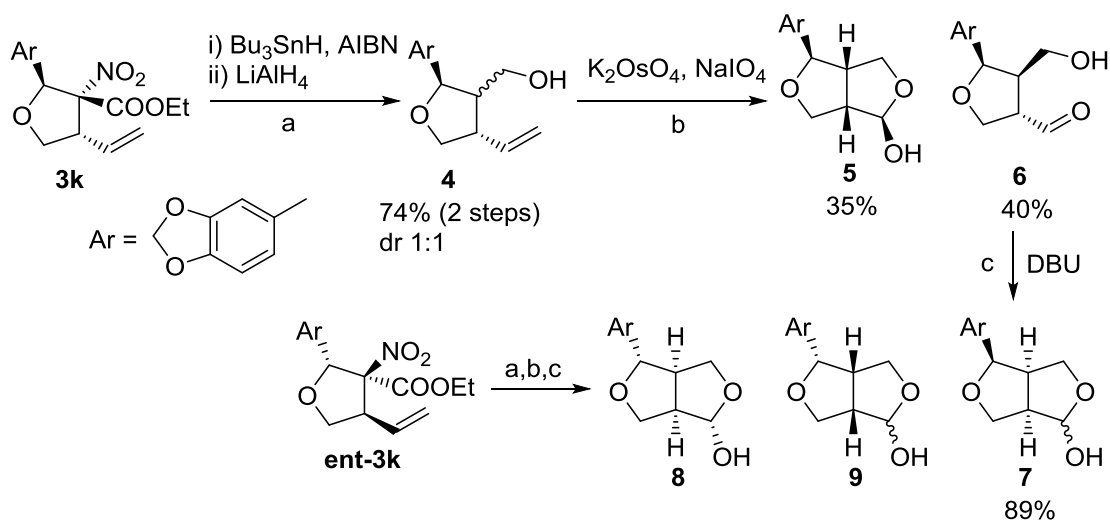

Procedure a: i) According to the literature<sup>4</sup>, to a stirred solution of the product **3k** (402 mg, 1.2 mmol) and tributyltin hydride (640  $\mu$ L, 2.4 mmol) in PhMe (12 mL), AIBN (236.8 mg, 0.7 mmol) were added at room temperature. After being stirred at 80 °C for 20 min, the reaction mixture was cooled to room temperature and 6 mL  $\text{CCl}_4$  were added. After being stirred at room temperature for 20 min, sat. KF aq. solution (50 mL) was added to the reaction mixture and the mixture was extracted with ethyl acetate. The combined organic layers were dried over anhydrous  $\text{Na}_2\text{SO}_4$ . After removal of  $\text{Na}_2\text{SO}_4$  by a filtration, the solution was concentrated under reduced pressure to get the crude oil.

ii) According to the literature<sup>5</sup>,  $\text{LiAlH}_4$  (3.6 mmol, 3 equiv.) was carefully added to a stirred solution of the above-mentioned crude oil in THF (20 mL) at 0 °C. After being stirred for 75 minutes at room temperature, the reaction mixture was diluted at 0 °C by the careful addition of saturated aqueous  $\text{NH}_4\text{Cl}$  solution. The phases were then separated, the aqueous layer was extracted with ethyl acetate, and the combined organic phases were dried over anhydrous  $\text{Na}_2\text{SO}_4$ . After removal of  $\text{Na}_2\text{SO}_4$  by a filtration, the solution was concentrated at reduced pressure. Purification by chromatography (petroleum ether/ethyl acetate, 10/2) provided the compound **4** (220 mg, d.r. = 1:1, 74% (2 steps)) as a colorless oil.

Procedure b: According to the literature<sup>6</sup>, in a two-neck round-bottom flask equipped with a magnetic stir bar and glass stoppers, compound **4** (129 mg, 0.52 mmol, 1 equiv.) was dissolved in  $t$ BuOH/ $\text{H}_2\text{O}$ /THF (v/v = 1:1:1, 24 mL). To this solution,  $\text{K}_2\text{OsO}_4 \cdot 2\text{H}_2\text{O}$  (10 mg, 0.026 mmol, 5 mol%), and 4-methyl morpholine N-oxide (NMO) (183 mg, 1.56 mmol, 3

equiv.) were sequentially added. The resulting mixture was stirred at 35 °C for 40 h. The reaction mixture was quenched with saturated aqueous Na<sub>2</sub>SO<sub>3</sub> (16 mL) and stirred at room temperature for 1h. Then, the aqueous phase was extracted with EtOAc (3 × 10 mL). The organic layers combined and washed with aqueous KOH (1 M, 2 × 16 mL), dried over Na<sub>2</sub>SO<sub>4</sub>, and concentrated under reduced pressure. The obtained crude was then dissolved in acetone/H<sub>2</sub>O (v/v = 3:1, 16 mL), and NaIO<sub>4</sub> (334 mg, 1.56 mmol, 3 equiv.) was added. The reaction mixture was stirred at room temperature for 1 h and subsequently quenched by the addition of brine (20 mL). The obtained mixture was extracted with EtOAc, the organic layers dried over Na<sub>2</sub>SO<sub>4</sub> and after removal of Na<sub>2</sub>SO<sub>4</sub> by a filtration, the solution was concentrated under reduced pressure. Purification by a short column chromatography on silica (petroleum ether /ethyl acetate 10/3) afforded the hemiacetal product **5** [(-)-samin] (colorless needles, 45 mg, 35% yield) and aldehyde **6** (52 mg, 40% yield). When **ent-3k** was used in this reaction system, the enantiomer product hemiacetal product **8** [(+)-samin] (colorless needles) and aldehyde **ent-6** were provided with the same results.

Procedure c: According to the literature<sup>7</sup>, the aldehyde **6** was dissolved in toluene (5 mL), 1,8-Diazabicyclo[5.4.0]undec-7-ene (DBU) (2 equiv.) was added at room temperature. The reaction mixture was stirred at room temperature for 3 h, removed the solvent under reduced pressure. Purification by a short column chromatography on silica (petroleum ether /ethyl acetate 10/3) afforded hemiacetal product **7** (46 mg, 89% yield). When aldehyde **ent-6** was used in this reaction system, the enantiomer product hemiacetal product **9** was provided with the same results.

**((2R,4S)-2-(benzo[d][1,3]dioxol-5-yl)-4-vinyltetrahydrofuran-3-yl)methanol (4)**

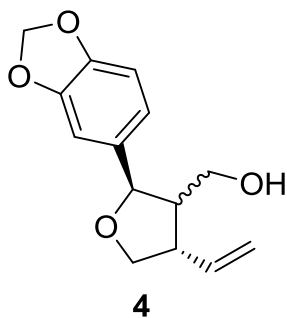

<sup>1</sup>H NMR (500 MHz, Chloroform-*d*): First-diastereomer : δ 6.86–6.78 (overlapped, 1H), 6.78–



6.71 (overlapped, 3H), 5.96–5.92 (overlapped, 2H), 5.92–5.86 (overlapped, 1H), 5.13–5.04 (m, 2H), 4.66 (d,  $J = 7.5$  Hz, 1H), 4.20 (dd,  $J = 8.6, 6.7$  Hz, 1H), 3.80 (dd,  $J = 8.5, 5.5$  Hz, 1H), 3.74–3.67 (m, 1H), 3.67–3.56 (overlapped, 1H), 3.15–3.04 (m, 1H), 2.35–2.25 (m, 1H), 1.96 (overlapped, 1H); Second-diastereomer :  $\delta$  6.86–6.78 (overlapped, 1H), 6.78–6.71 (overlapped, 3H), 5.96–5.92 (overlapped, 2H), 5.75 (ddd,  $J = 18.0, 9.5, 8.0$  Hz, 1H), 5.22–5.14 (m, 3H), 4.26 (t,  $J = 8.5$  Hz, 1H), 3.67–3.56 (overlapped, 1H), 3.36 (dd,  $J = 11.5, 5.5$  Hz, 1H), 3.30–3.20 (m, 1H), 2.74 (p,  $J = 8.5$  Hz, 1H), 2.43–2.38 (m, 1H), 1.96 (overlapped, 1H);  $^{13}\text{C}$  NMR (125 MHz, Chloroform-*d*)  $\delta$  147.7, 146.8, 137.3, 136.3, 135.4, 133.5, 119.3, 119.2, 117.3, 116.8, 108.0, 107.9, 106.8, 106.2, 100.9, 100.8, 82.4, 82.0, 72.6, 72.4, 61.6, 60.6, 53.6, 51.5, 45.9, 45.6; HRMS (ESI-MS): Calcd. for  $\text{C}_{14}\text{H}_{16}\text{O}_4$  ( $\text{M}+\text{Na}$ ): 271.0941, Found: 271.0943.

**(3a*S*,4*R*,6a*S*)-4-(benzo[*d*][1,3]dioxol-5-yl)tetrahydro-1*H*,3*H*-furo[3,4-*c*]furan-1-ol** (5)

**[(-)-samin]**

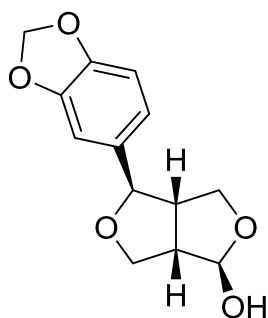

**(-)-samin**

$^1\text{H}$  NMR (500 MHz, Chloroform-*d*)  $\delta$  6.86 (d,  $J = 1.6$  Hz, 1H), 6.83–6.74 (m, 2H), 5.95 (s, 2H), 5.38 (s, 1H), 4.46–4.31 (m, 2H), 4.17 (dd,  $J = 9.1, 6.0$  Hz, 1H), 3.91 (dd,  $J = 9.1, 1.4$  Hz, 1H), 3.57 (dd,  $J = 9.2, 7.4$  Hz, 1H), 3.07 (q,  $J = 8.9$  Hz, 1H), 2.95–2.82 (m, 1H), 1.69 (s, 1H);  $^{13}\text{C}$  NMR (125 MHz, Chloroform-*d*)  $\delta$  147.9, 147.2, 134.5, 119.6, 108.1, 106.5, 102.2, 101.0, 86.8, 71.2, 69.3, 53.6, 52.7; HRMS (ESI-MS): Calcd. for  $\text{C}_{13}\text{H}_{14}\text{O}_5$  ( $\text{M}+\text{Na}$ ): 273.0733, Found: 273.0736.

**(3a*R*,4*R*,6a*R*)-4-(benzo[*d*][1,3]dioxol-5-yl)tetrahydro-1*H*,3*H*-furo[3,4-*c*]furan-1-ol** (7)

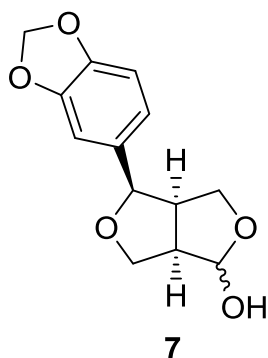

$^1\text{H}$  NMR (500 MHz, Chloroform-*d*)  $\delta$  6.85–6.81 (m, 1H), 6.80–6.70 (m, 2H), 5.94 (s, 2H), 5.38 (s, 1H), 4.81 (d,  $J = 5.8$  Hz, 1H), 4.04 (dd,  $J = 9.5, 2.7$  Hz, 1H), 3.95–3.84 (m, 1H), 3.81 (dd,  $J = 9.4, 7.6$  Hz, 1H), 3.51 (dd,  $J = 9.3, 3.2$  Hz, 1H), 3.17–3.10 (m, 1H), 3.00–2.90 (m, 1H);  $^{13}\text{C}$  NMR (125 MHz, Chloroform-*d*)  $\delta$  147.5, 146.5, 132.4, 119.1, 108.0, 106.6, 104.2, 100.8, 83.4, 70.8, 67.6, 52.0, 47.3; HRMS (ESI-MS): Calcd. for  $\text{C}_{13}\text{H}_{14}\text{O}_5$  ( $\text{M}+\text{Na}$ ): 273.0733, Found: 273.0731.

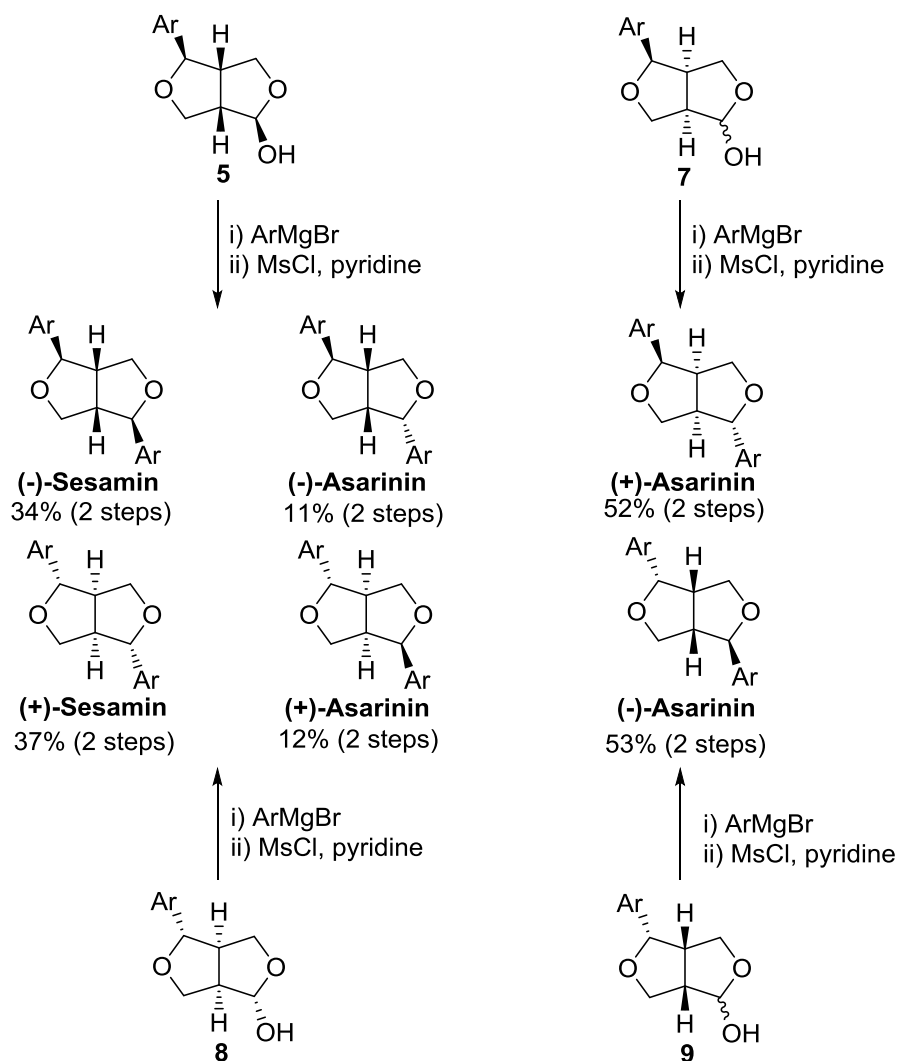

General procedure: According to the literature<sup>8</sup>, the compound **5** (50 mg, 0.2 mmol) was dissolved in THF (5 mL) under nitrogen, then the freshly prepared 3,4-methylenedioxyphenylmagnesium bromide (3 equiv., 1 mol/mL in THF) was added dropwise, the mixture was stirred at 40 °C overnight. The reaction mixture was quenched at 0 °C by the careful addition of saturated aqueous NH<sub>4</sub>Cl solution. The phases were then separated, the aqueous layer was extracted with ethyl acetate, and the combined organic phases were dried and concentrated at reduced pressure to provide the crude diol.

According to the literature<sup>9</sup>, to a solution of crude diol in CH<sub>2</sub>Cl<sub>2</sub> (0.4 mL) and pyridine (0.2 mL) at 0 °C was added MsCl (80 μL, 1.03 mmol) and the reaction warmed to room temperature and stirred for 1 day. The mixture was pipetted onto 1 N HCl (5 mL) and diluted with CH<sub>2</sub>Cl<sub>2</sub> (8 mL). The organic layer was separated and the aqueous layer extracted with CH<sub>2</sub>Cl<sub>2</sub> (3 × 10 mL). The combined organic layers were washed with 1 N HCl (10 mL) and

brine (15 mL), dried with MgSO<sub>4</sub>, and concentrated in vacuo and purification by a short column chromatography on silica (petroleum ether/ethyl acetate, 10/1) afforded desired natural product (-)-Sesamin (white solid) and(-)-Asarinin (white solid) respectively.

**(1*R*,3*aS*,4*R*,6*aS*)-1,4-bis(benzo[*d*][1,3]dioxol-5-yl)tetrahydro-1*H*,3*H*-furo[3,4-*c*]furan**

**(-)-Sesamin**

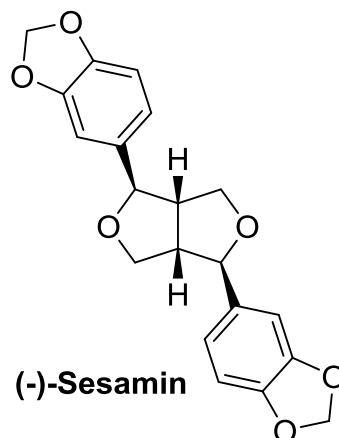

According to the above procedure, (-)-Sesamin was afforded (24.0 mg) (yield 34% in 2 steps) as a white solid; m.p. = 120-121 °C,  $[\alpha]_D^{25} = -63.24$  ( $c = 0.740$ , CH<sub>2</sub>Cl<sub>2</sub>) {lit.<sup>10</sup> m.p. = 123-124.5 °C,  $[\alpha]_D^{25} = -64.24$  ( $c = 1.08$ , CHCl<sub>3</sub>)}; <sup>1</sup>H NMR (500 MHz, Chloroform-*d*)  $\delta$  6.87–6.83(m, 2H), 6.82–6.75 (m, 4H), 5.94 (s, 4H), 4.71 (d,  $J = 4.4$  Hz, 2H), 4.30–4.16 (m, 2H), 3.86 (dd,  $J = 9.2, 3.5$  Hz, 2H), 3.13–2.99 (m, 2H); <sup>13</sup>C NMR (125 MHz, Chloroform-*d*)  $\delta$  147.9, 147.0, 135.0, 119.3, 108.1, 106.4, 101.0, 85.7, 71.6, 54.2; HRMS (ESI-MS): Calcd. for C<sub>20</sub>H<sub>18</sub>O<sub>6</sub> (M+Na): 377.0996, Found: 377.0999.

**(1*R*,3*aS*,4*S*,6*aS*)-1,4-bis(benzo[*d*][1,3]dioxol-5-yl)tetrahydro-1*H*,3*H*-furo[3,4-*c*]furan**

**(-)-Asarinin**

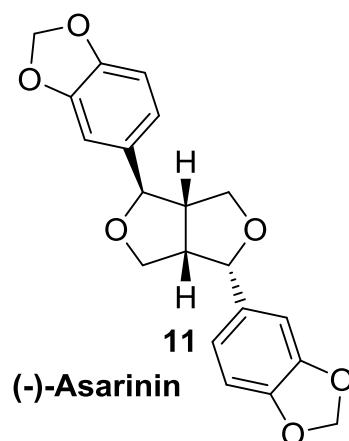

According to the above procedure, (-)-Asarinin was afforded (7.8 mg) (yield 11% in 2 steps) as a white solid; m.p. = 123-124 °C,  $[\alpha]_D^{25} = -70.00$  ( $c = 0.200$ ,  $\text{CH}_2\text{Cl}_2$ ) {lit.<sup>11</sup> m.p. = 122-123 °C,  $[\alpha]_D^{26} = -71.90$  ( $c = 0.19$ ,  $\text{CHCl}_3$ )};  $^1\text{H}$  NMR (400 MHz, Chloroform-*d*)  $\delta$  6.90–6.85 (m, 2H), 6.84–6.75 (m, 4H), 5.96 (s, 2H), 5.95 (s, 2H), 4.83 (d,  $J = 5.3$  Hz, 1H), 4.39 (d,  $J = 7.1$  Hz, 1H), 4.10 (d,  $J = 9.4$  Hz, 1H), 3.99–3.77 (m, 2H), 3.40–3.21 (m, 2H), 2.95–2.75 (m, 1H);  $^{13}\text{C}$  NMR (125MHz, Chloroform-*d*)  $\delta$  147.9, 147.6, 147.1, 146.5, 135.0, 132.2, 119.5, 118.6, 108.1, 106.5, 106.3, 101.0, 100.9, 87.6, 82.0, 70.8, 69.6, 54.6, 52.5, 50.1; HRMS (ESI-MS): Calcd. for  $\text{C}_{20}\text{H}_{18}\text{O}_6$  ( $\text{M}+\text{Na}$ ): 377.0996, Found: 377.0996.

**(1*S*,3*aR*,4*S*,6*aR*)-1,4-bis(benzo[*d*][1,3]dioxol-5-yl)tetrahydro-1*H*,3*H*-furo[3,4-*c*]furan**

**(+)-Sesamin**

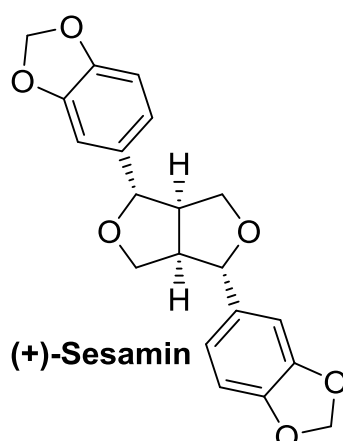

According to the above procedures, compound **7** was used as starting material, (+)-Sesamin was afforded (26.2 mg) (yield 37% in 2 steps) as a white solid; m.p. = 120-121 °C  $[\alpha]_D^{25} =$

+60.54 ( $c = 0.740$ ,  $\text{CH}_2\text{Cl}_2$ ) {lit.<sup>12</sup> m.p. = 122 °C,  $[\alpha]^{20.4}_{\text{D}} = +61.5$  ( $c = 0.58$ ,  $\text{CH}_2\text{Cl}_2$ )};  $^1\text{H}$  NMR (500 MHz, Chloroform- $d$ )  $\delta$  6.87–6.83(m, 2H), 6.82–6.75 (m, 4H), 5.94 (s, 4H), 4.71 (d,  $J = 4.5$  Hz, 2H), 4.30–4.16 (m, 2H), 3.86 (dd,  $J = 9.0, 3.5$  Hz, 2H), 3.13–2.99 (m, 2H);  $^{13}\text{C}$  NMR (125 MHz, Chloroform- $d$ )  $\delta$  147.9, 147.0, 135.0, 119.3, 108.1, 106.4, 101.0, 85.7, 71.6, 54.2; HRMS (ESI-MS): Calcd. for  $\text{C}_{20}\text{H}_{18}\text{O}_6$  (M+Na): 377.0996, Found: 377.0994.

**(1*R*,3*aR*,4*S*,6*aR*)-1,4-bis(benzo[*d*][1,3]dioxol-5-yl)tetrahydro-1*H*,3*H*-furo[3,4-*c*]furan**

**(+)-Asarinin**

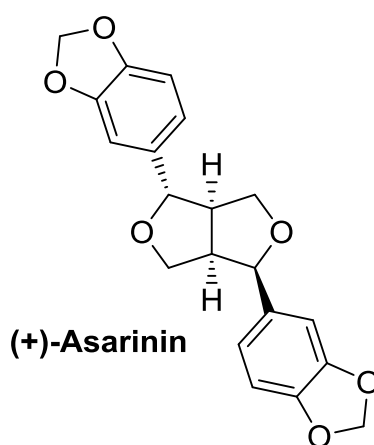

According to the above procedure, compound **7** was used as starting material, (+)-Asarinin was afforded (8.5 mg) (yield 12% in 2 steps ) as a white solid; m.p. = 120-121 °C  $[\alpha]^{25}_{\text{D}} = +61$  ( $c = 0.160$ ,  $\text{CH}_2\text{Cl}_2$ ) {lit.<sup>13</sup> m.p. = 123 °C,  $[\alpha]^{25}_{\text{D}} = +77.8$  ( $c = 0.45$ ,  $\text{CHCl}_3$ )};  $^1\text{H}$  NMR (400 MHz, Chloroform- $d$ )  $\delta$  6.90–6.85 (m, 2H), 6.8–6.75 (m, 4H), 5.96 (s, 2H), 5.95 (s, 2H), 4.83 (d,  $J = 5.3$  Hz, 1H), 4.39 (d,  $J = 7.1$  Hz, 1H), 4.10 (d,  $J = 9.4$  Hz, 1H), 3.99–3.77 (m, 2H), 3.40–3.21 (m, 2H), 2.95–2.75 (m, 1H);  $^{13}\text{C}$  NMR (125 MHz, Chloroform- $d$ )  $\delta$  147.9, 147.6, 147.1, 146.5, 135.0, 132.2, 119.5, 118.6, 108.1, 106.5, 106.3, 101.0, 100.9, 87.6, 82.0, 70.8, 69.6, 54.6, 52.5, 50.1; HRMS (ESI-MS): Calcd. for  $\text{C}_{20}\text{H}_{18}\text{O}_6$  (M+Na): 377.0996, Found: 377.0993.

**(1*R*,3*aR*,4*S*,6*aR*)-1,4-bis(benzo[*d*][1,3]dioxol-5-yl)tetrahydro-1*H*,3*H*-furo[3,4-*c*]furan**

**(+)-Asarinin**

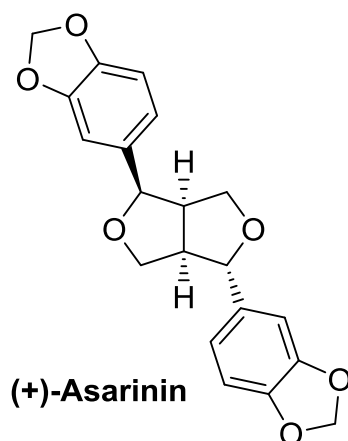

According to the above procedures, compound **8** was used as starting material, (+)-Asarinin was afforded (36.8 mg) (yield 52% in 2 steps) as a white solid; m.p. = 122-123 °C,  $[\alpha]^{25}_{\text{D}} = +90$  ( $c = 0.240$ ,  $\text{CH}_2\text{Cl}_2$ ) {lit.<sup>13</sup> m.p. = 123 °C,  $[\alpha]^{25}_{\text{D}} = +77.8$  ( $c = 0.45$ ,  $\text{CHCl}_3$ )}; <sup>1</sup>H NMR (400 MHz, Chloroform-*d*)  $\delta$  6.90–6.85 (m, 2H), 6.84–6.75 (m, 4H), 5.96 (s, 2H), 5.95 (s, 2H), 4.83 (d,  $J = 5.3$  Hz, 1H), 4.39 (d,  $J = 7.1$  Hz, 1H), 4.10 (d,  $J = 9.4$  Hz, 1H), 3.99–3.77 (m, 2H), 3.40–3.21 (m, 2H), 2.95–2.75 (m, 1H); <sup>13</sup>C NMR (125MHz, Chloroform-*d*)  $\delta$  147.9, 147.6, 147.1, 146.5, 135.0, 132.2, 119.5, 118.6, 108.1, 106.5, 106.3, 101.0, 100.9, 87.6, 82.0, 70.8, 69.6, 54.6, 52.5, 50.1; HRMS (ESI-MS): Calcd. for  $\text{C}_{20}\text{H}_{18}\text{O}_6$  (M+Na): 377.0996, Found: 377.0999.

**(1*R*,3*aS*,4*S*,6*aS*)-1,4-bis(benzo[*d*][1,3]dioxol-5-yl)tetrahydro-1*H*,3*H*-furo[3,4-*c*]furan**

**(-)-Asarinin**

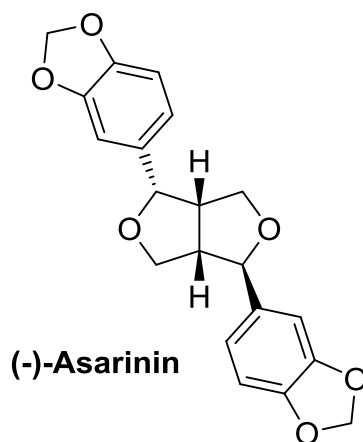

According to the above procedures, compound **9** was used as starting material, (-)-Asarinin was afforded (41.46 mg) (yield 53% in 2 steps) as a white solid; m.p. = 122-123 °C [ $\alpha$ ]<sup>25</sup><sub>D</sub> = -82 (*c* = 0.200, CH<sub>2</sub>Cl<sub>2</sub>) {lit.<sup>11</sup> m.p. = 122-123 °C, [ $\alpha$ ]<sup>26</sup><sub>D</sub> = -71.9 (*c* = 0.19, CHCl<sub>3</sub>)}. <sup>1</sup>H NMR (400 MHz, Chloroform-*d*)  $\delta$  6.90–6.85 (m, 2H), 6.84–6.75 (m, 4H), 5.96 (s, 2H), 5.95 (s, 2H), 4.83 (d, *J* = 5.3 Hz, 1H), 4.39 (d, *J* = 7.1 Hz, 1H), 4.10 (d, *J* = 9.4 Hz, 1H), 3.99–3.77 (m, 2H), 3.40–3.21 (m, 2H), 2.95–2.75 (m, 1H); <sup>13</sup>C NMR (125 MHz, Chloroform-*d*)  $\delta$  147.9, 147.6, 147.1, 146.5, 135.0, 132.2, 119.5, 118.6, 108.1, 106.5, 106.3, 101.0, 100.9, 87.6, 82.0, 70.8, 69.6, 54.6, 52.5, 50.1; HRMS (ESI-MS): Calcd. for C<sub>20</sub>H<sub>18</sub>O<sub>6</sub> (M+Na): 377.0996, Found: 377.0998.

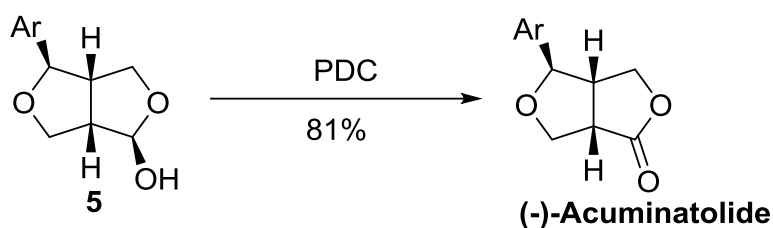

**(3a*S*,4*R*,6a*S*)-4-(benzo[*d*][1,3]dioxol-5-yl)tetrahydro-1*H*,3*H*-furo[3,4-*c*]furan-1-one**

**(-)-Acuminatolide**

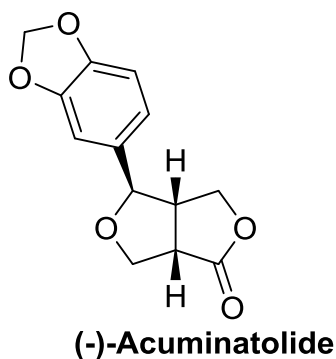

According to the literature<sup>14</sup>, to a solution of compound **5** (0.32 mmol) in dry CH<sub>2</sub>Cl<sub>2</sub> was added pyridinium dichromate (PDC) (4 equiv., 481 mg), AcOH (1 equiv., 20  $\mu$ L), and 4Å molecular sieves (500 mg). The resulting suspension was stirred for 6 h at room temperature, then filtrated through a plug of silica gel and the filtrate was evaporated in vacuo to give a yellow solid and purification by a short column chromatography on silica (petroleum ether/ethyl acetate, 10/2) afforded (-)-Acuminatolide as a white solid in 81% yield (64.3 mg);



mp 118–119 °C; <sup>1</sup>H NMR (500 MHz, Chloroform-*d*) δ 6.87–6.83 (m, 1H), 6.82–6.75 (m, 2H), 5.97 (s, 2H), 4.61 (d, *J* = 6.8 Hz, 1H), 4.49 (dd, *J* = 9.8, 6.9 Hz, 1H), 4.39–4.28 (m, 2H), 4.19 (dd, *J* = 9.3, 3.8 Hz, 1H), 3.44 (td, *J* = 8.9, 3.8 Hz, 1H), 3.15–3.05 (m, 1H); <sup>13</sup>C NMR (125 MHz, Chloroform-*d*) δ 178.0, 148.2, 147.7, 132.7, 119.6, 108.3, 106.3, 101.2, 86.0, 70.0, 69.7, 48.3, 45.9; HRMS (ESI-MS): Calcd. for C<sub>13</sub>H<sub>12</sub>O<sub>5</sub> (M+Na): 271.0577, Found: 271.0579.

### X-rays crystallography of **3i** (CCDC2015920) and (-)-Acuminatolide (CCDC2015921)

Single crystal of **3i** and (-)-Acuminatolide were obtained from THF /n-Hexane solvent at room temperature. Diffraction data were collected on Bruker SMART Apex-III CMOS-Based X-ray diffractometer with Cu-Kα. Radiation ( $\lambda = 1.54178$ ). The empirical absorption correction was applied by using the SADABS program. The structure was solved using direct method, and refined by full matrix least-squares on F<sup>2</sup> (G.M Sheldrick, SHELXTL2014, program of crystal structure refinement, University of Göttingen, Germany).

**Table S1. Crystal Data and Structure Refinement for 3i**

|                                 |                                                                                                              |
|---------------------------------|--------------------------------------------------------------------------------------------------------------|
| Identification code             | <b>3i</b>                                                                                                    |
| Empirical formula               | C <sub>17</sub> H <sub>21</sub> N O <sub>7</sub>                                                             |
| Formula weight                  | 351.35                                                                                                       |
| Temperature                     | 296(2) K                                                                                                     |
| Wavelength                      | 1.54178 Å                                                                                                    |
| Crystal system, space group     | Orthorhombic, P2(1)2(1)2(1)                                                                                  |
| Unit cell dimensions            | a = 6.921(6) Å    alpha = 90 deg.<br>b = 10.91(3) Å    beta = 90 deg.<br>c = 24.068(19) Å    gamma = 90 deg. |
| Volume                          | 1817(5) Å <sup>3</sup>                                                                                       |
| Z, Calculated density           | 4, 1.285 Mg/m <sup>3</sup>                                                                                   |
| Absorption coefficient          | 0.846 mm <sup>-1</sup>                                                                                       |
| F(000)                          | 744                                                                                                          |
| Crystal size                    | 0.180 x 0.160 x 0.120 mm                                                                                     |
| Theta range for data collection | 3.673 to 65.128 deg.                                                                                         |
| Limiting indices                | -7<=h<=8, -12<=k<=12, -28<=l<=28                                                                             |

|                                   |                                             |
|-----------------------------------|---------------------------------------------|
| Reflections collected / unique    | 21728 / 3094 [R(int) = 0.0442]              |
| Completeness to theta = 65.128    | 99.7 %                                      |
| Refinement method                 | Full-matrix least-squares on F <sup>2</sup> |
| Data / restraints / parameters    | 3094 / 0 / 230                              |
| Goodness-of-fit on F <sup>2</sup> | 1.020                                       |
| Final R indices [I>2sigma(I)]     | R1 = 0.0378, wR2 = 0.1043                   |
| R indices (all data)              | R1 = 0.0452, wR2 = 0.1131                   |
| Absolute structure parameter      | 0.04(8)                                     |
| Extinction coefficient            | 0.0051(9)                                   |
| Largest diff. peak and hole       | 0.149 and -0.094 e.Å <sup>-3</sup>          |

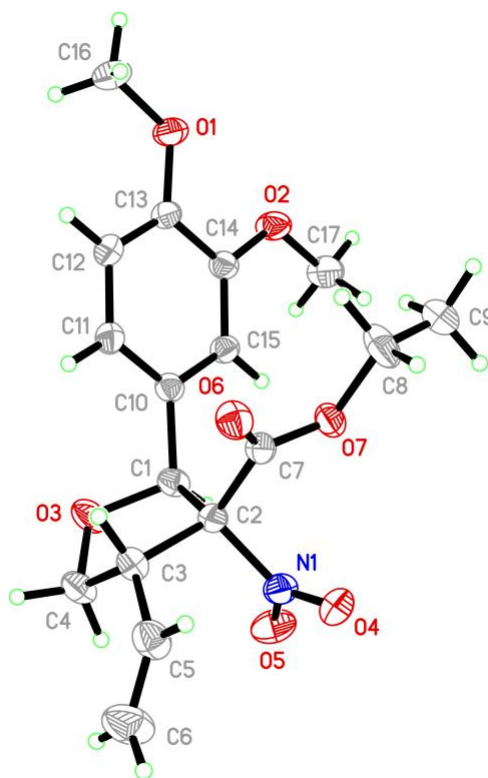

Figure S1: Molecular structure of **3i**

**Table S2. Crystal Data and Structure Refinement for (-)-Acuminatolide**

|                     |                                                |
|---------------------|------------------------------------------------|
| Identification code | <b>(-)-Acuminatolide</b>                       |
| Empirical formula   | C <sub>13</sub> H <sub>12</sub> O <sub>5</sub> |
| Formula weight      | 248.23                                         |

|                                   |                                                                                                                |
|-----------------------------------|----------------------------------------------------------------------------------------------------------------|
| Temperature                       | 298(2) K                                                                                                       |
| Wavelength                        | 1.54178 Å                                                                                                      |
| Crystal system, space group       | Orthorhombic, P2(1)2(1)2(1)                                                                                    |
| Unit cell dimensions              | a = 6.6885(3) Å    alpha = 90 deg.<br>b = 7.1093(3) Å    beta = 90 deg.<br>c = 24.1880(9) Å    gamma = 90 deg. |
| Volume                            | 1150.15(8) Å <sup>3</sup>                                                                                      |
| Z, Calculated density             | 4, 1.434 Mg/m <sup>3</sup>                                                                                     |
| Absorption coefficient            | 0.938 mm <sup>-1</sup>                                                                                         |
| F(000)                            | 520                                                                                                            |
| Crystal size                      | 0.180 x 0.160 x 0.150 mm                                                                                       |
| Theta range for data collection   | 3.655 to 68.391 deg.                                                                                           |
| Limiting indices                  | -8<=h<=8, -8<=k<=8, -29<=l<=29                                                                                 |
| Reflections collected / unique    | 12764 / 2095 [R(int) = 0.1044]                                                                                 |
| Completeness to theta = 67.679    | 99.1 %                                                                                                         |
| Refinement method                 | Full-matrix least-squares on F <sup>2</sup>                                                                    |
| Data / restraints / parameters    | 2095 / 0 / 163                                                                                                 |
| Goodness-of-fit on F <sup>2</sup> | 1.038                                                                                                          |
| Final R indices [I>2sigma(I)]     | R1 = 0.0329, wR2 = 0.0805                                                                                      |
| R indices (all data)              | R1 = 0.0687, wR2 = 0.0898                                                                                      |
| Absolute structure parameter      | 0.03(9)                                                                                                        |
| Extinction coefficient            | n/a                                                                                                            |
| Largest diff. peak and hole       | 0.250 and -0.251 e.Å <sup>-3</sup>                                                                             |

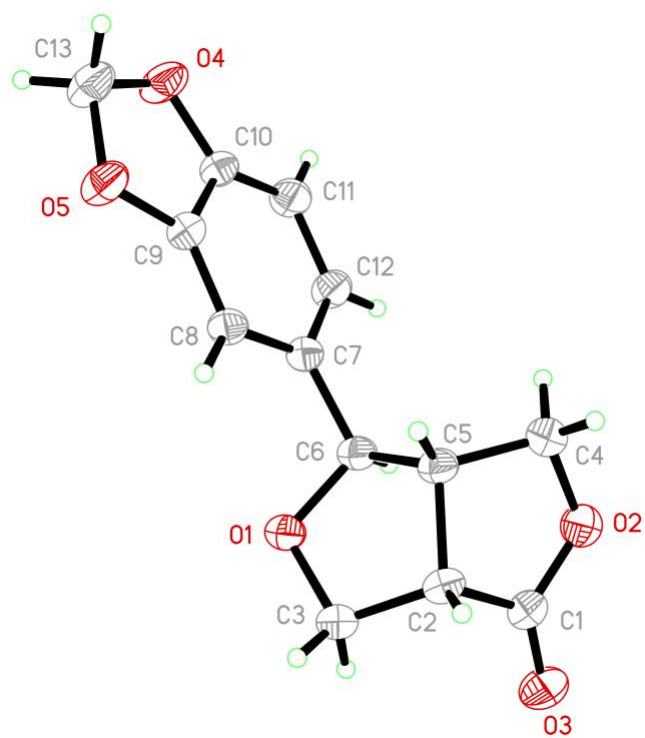

Figure S2: Molecular structure of (-)-Acuminatolide

## References:

- 1 A. Khan, R. Zheng, Y. Kan, J. Ye, J. Xing and Y. J. Zhang, *Angew. Chem. Int. Ed.*, 2014, **53**, 6557.
- 2 D. M. Hodgson, M. A. Stent and F. X. Wilson, *Synthesis*, 2002, 1445.
- 3 S. Nakamura, H. Sugimoto and T. Ohwada, *J. Am. Chem. Soc.*, 2007, **129**, 1724.
- 4 Y. Wei, L. Q. Lu, T. R. Li, B. Feng, Q. Wang, W. J. Xiao and H. Alper, *Angew. Chem. Int. Ed.*, 2016, **128**, 2240.
- 5 C. Schnabel and M. Hiersemann, *Org. Lett.*, 2009, **11**, 2555.
- 6 S. Singha, E. Serrano, S. Mondal, C. G. Daniliuc and F. Glorius, *Nat. Catal.*, 2020, **3**, 48.
- 7 T. Akindele, S. P. Marsden and J. G. Cumming, *Tetrahedron Lett.*, 2005, **46**, 7235.
- 8 S. Takano, T. Ohkawa, S. I. Tamori, S. Satoh and K. Ogasawara, *J. Chem. Soc. Chem. Commun.*, 1988, **3**, 189.
- 9 R. C. Brown, C. J. Bataille, G. Bruton, J. D. Hinks and N. A. Swain, *J. Org. Chem.*, 2001, **66**, 6719.
- 10 H. Ina, A. Asai, H. Iida and T. Ushida, *Planta Med.*, 1987, **53**, 228.
- 11 K. Samizu and K. Ogasawara, *Chem. Lett.*, 1995, 543.
- 12 S. M. Seo, H. J. Lee, O. K. Lee, H. J. Jo, H. Y. Kang, D. H. Choi and M. Khan, *Chem. Nat. Compd.*, 2008, **44**, 419.
- 13 C. L. Lin, C. L. Kao, W. J. Li, H. T. Li and C. Y. Chen, *Chem. Nat. Compd.*, 2018, **54**, 762.
- 14 A. P. Marchand, J. Zajicek and G. N. Lewis, *Can. J. Chem.*, 1997, **75**, 840.

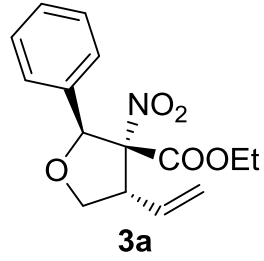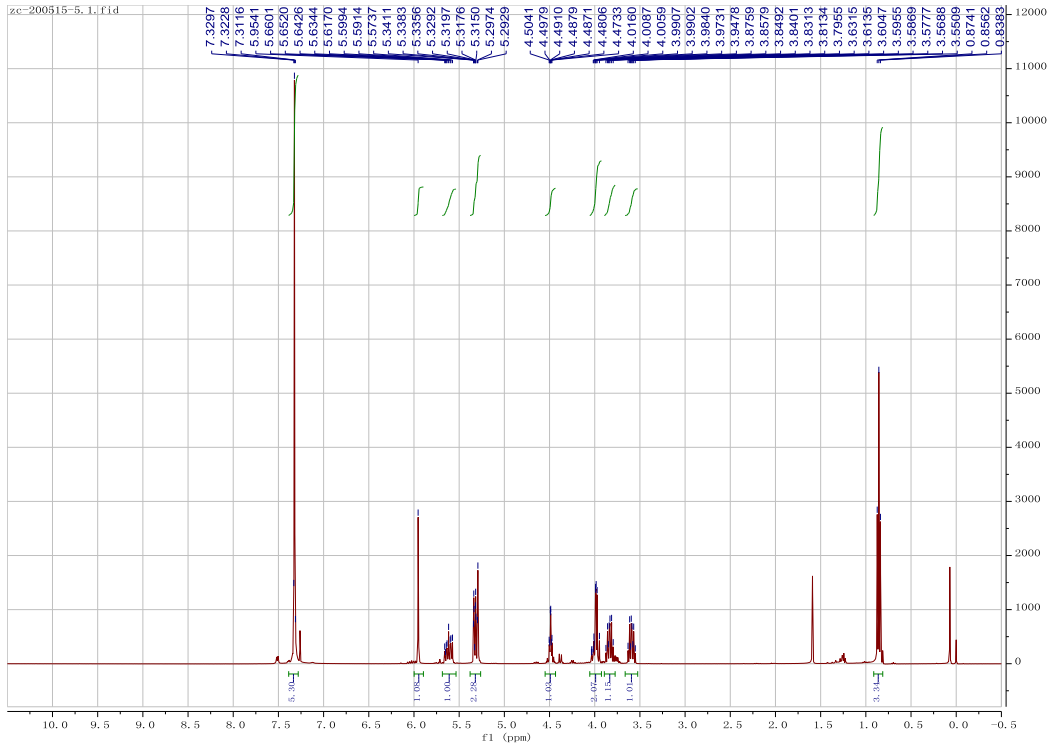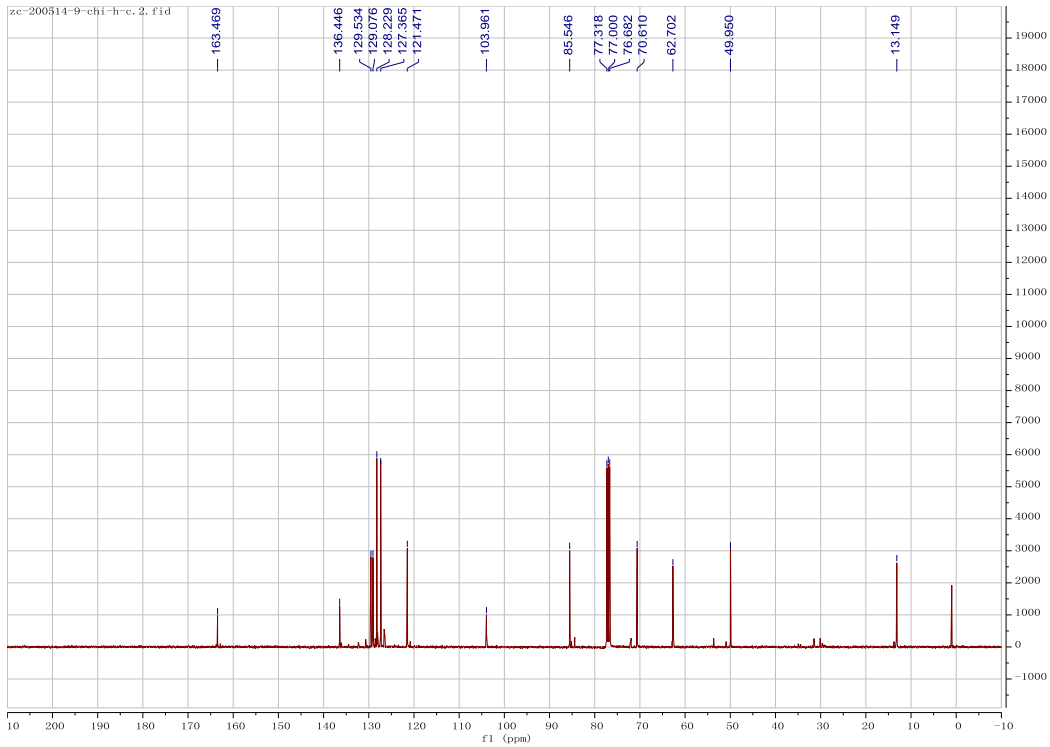

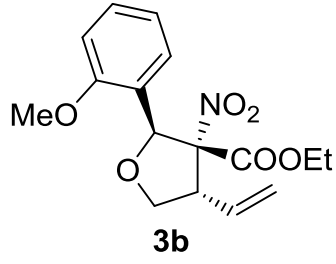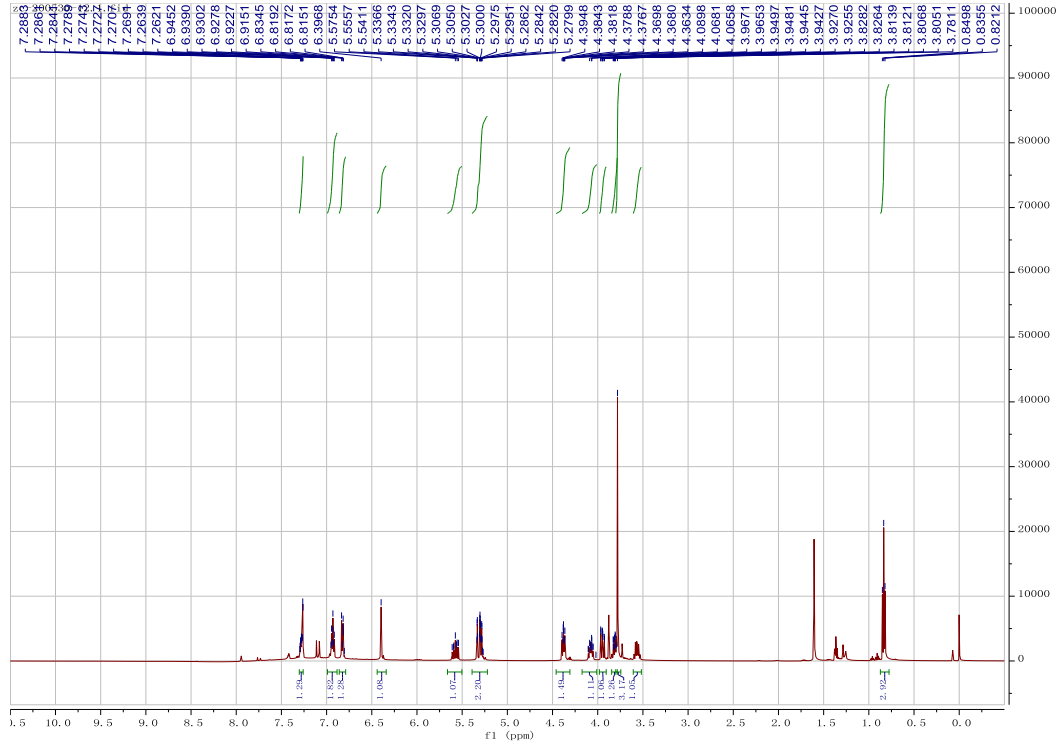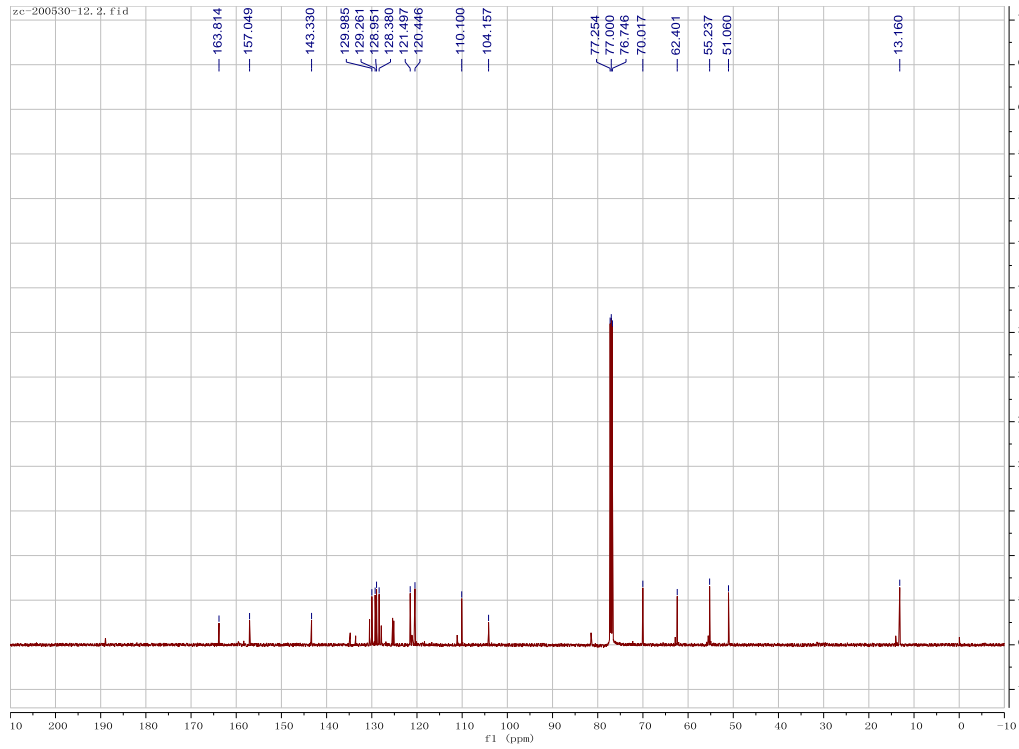

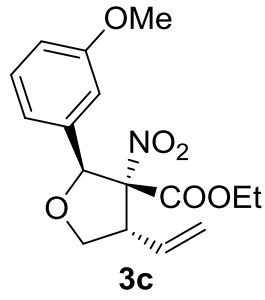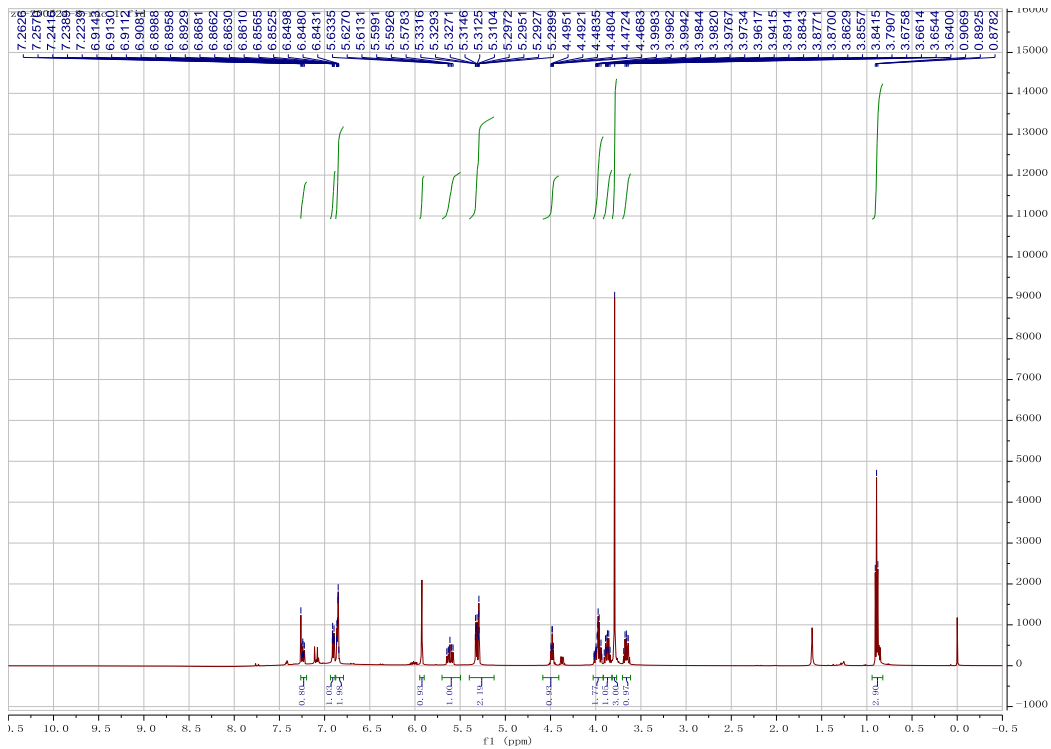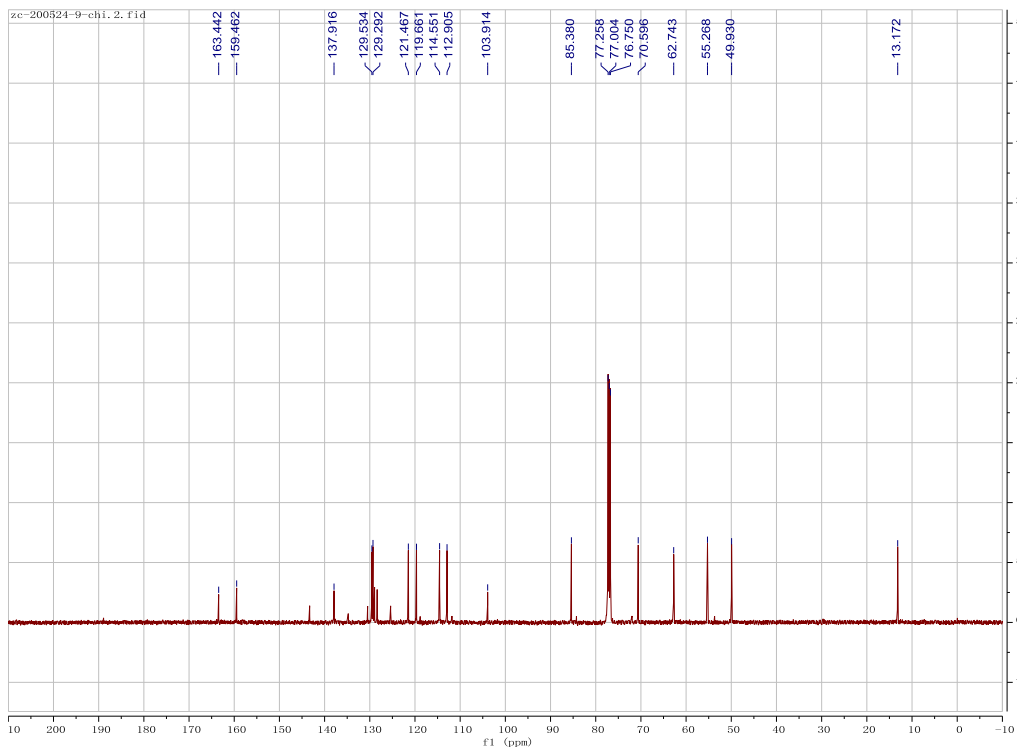



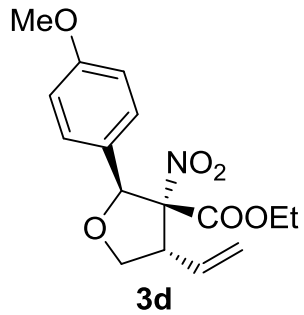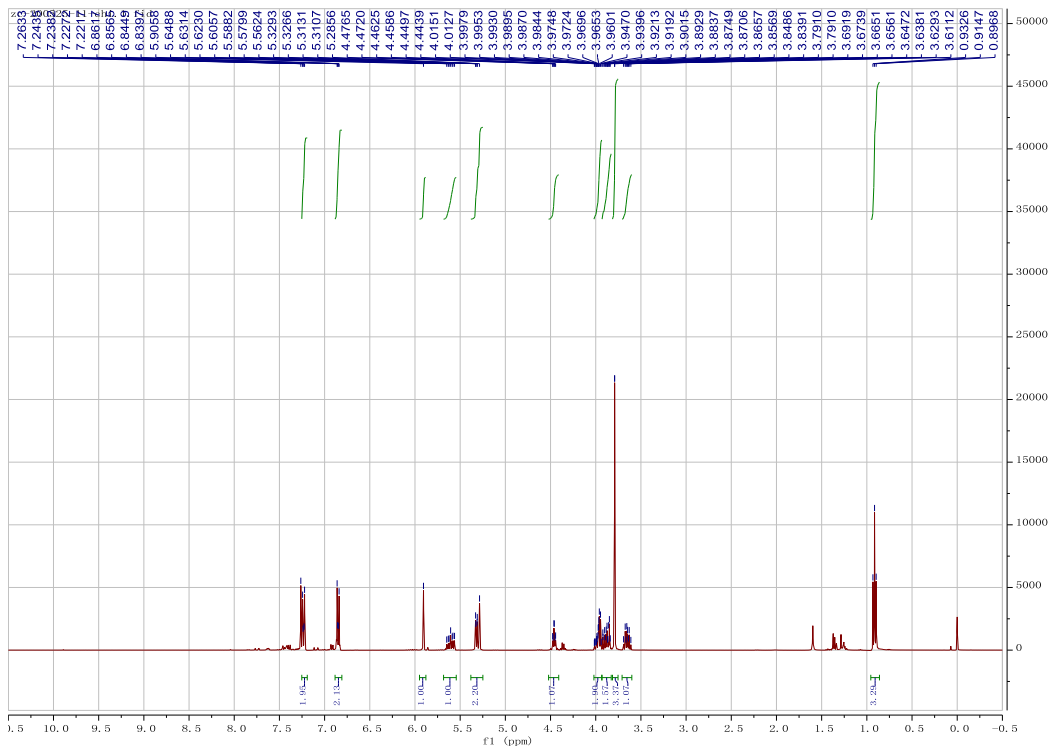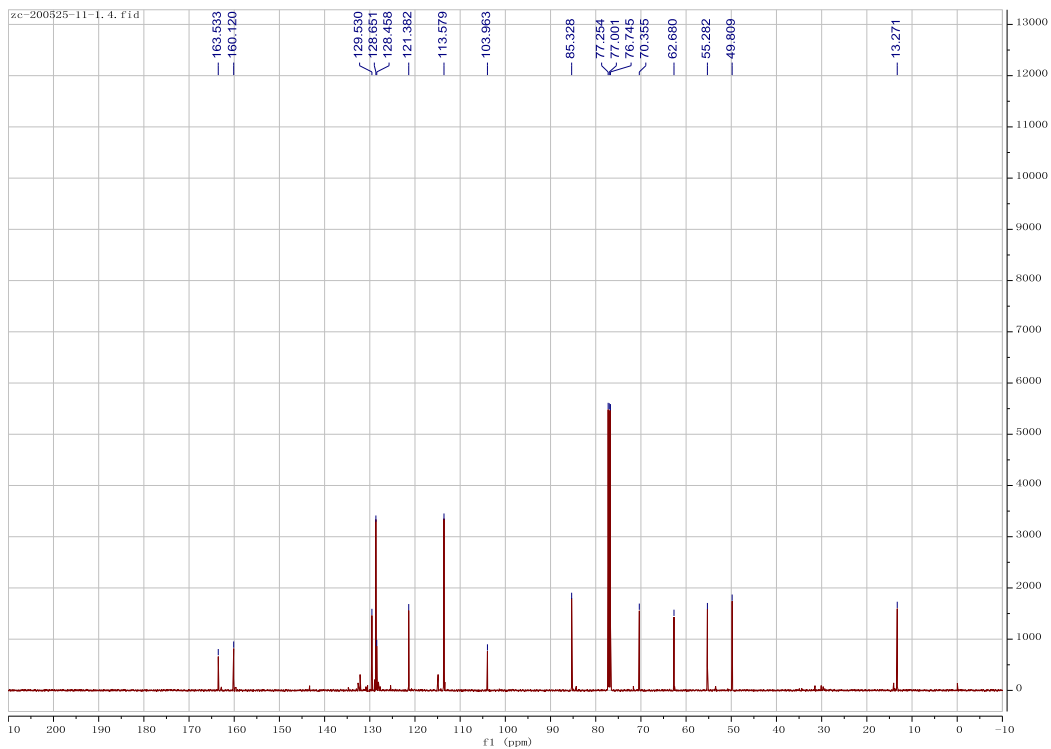

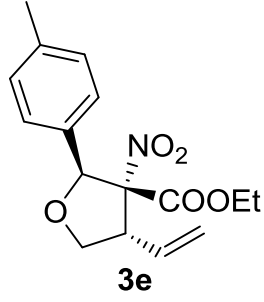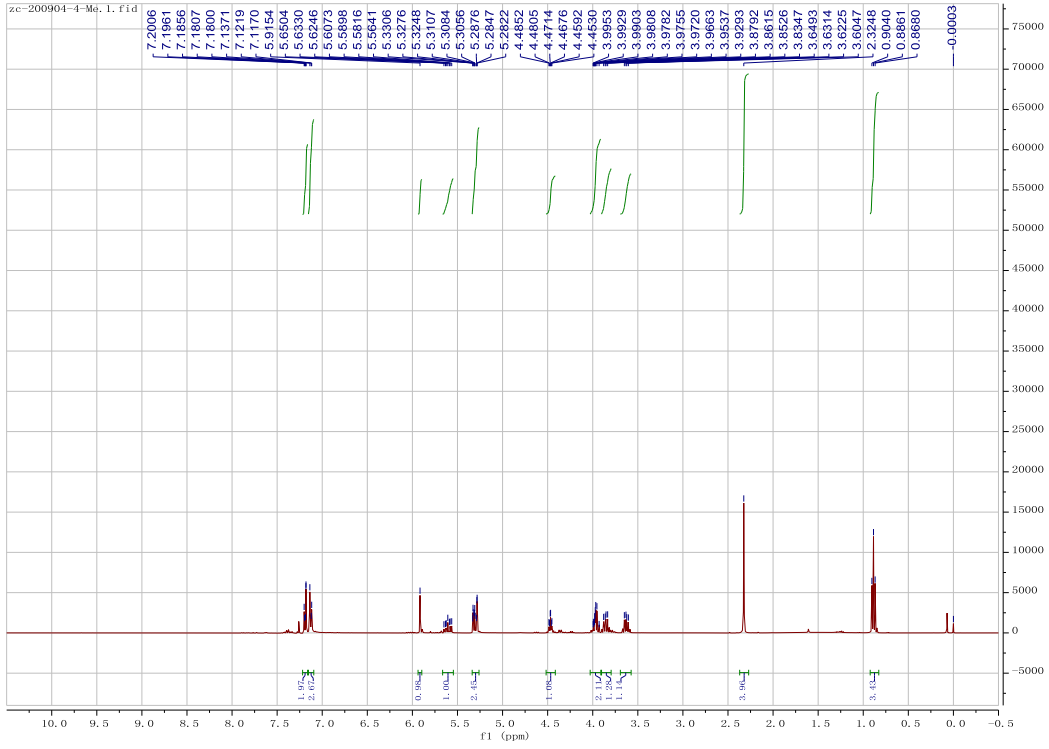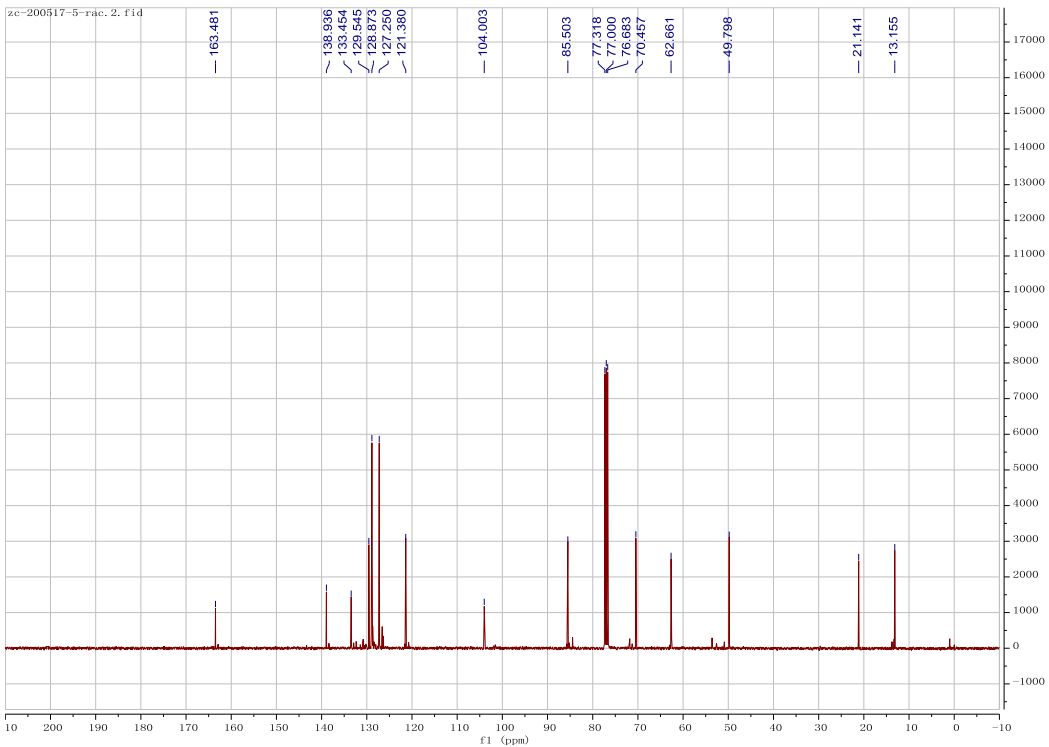

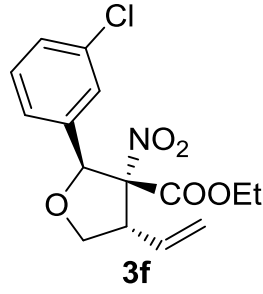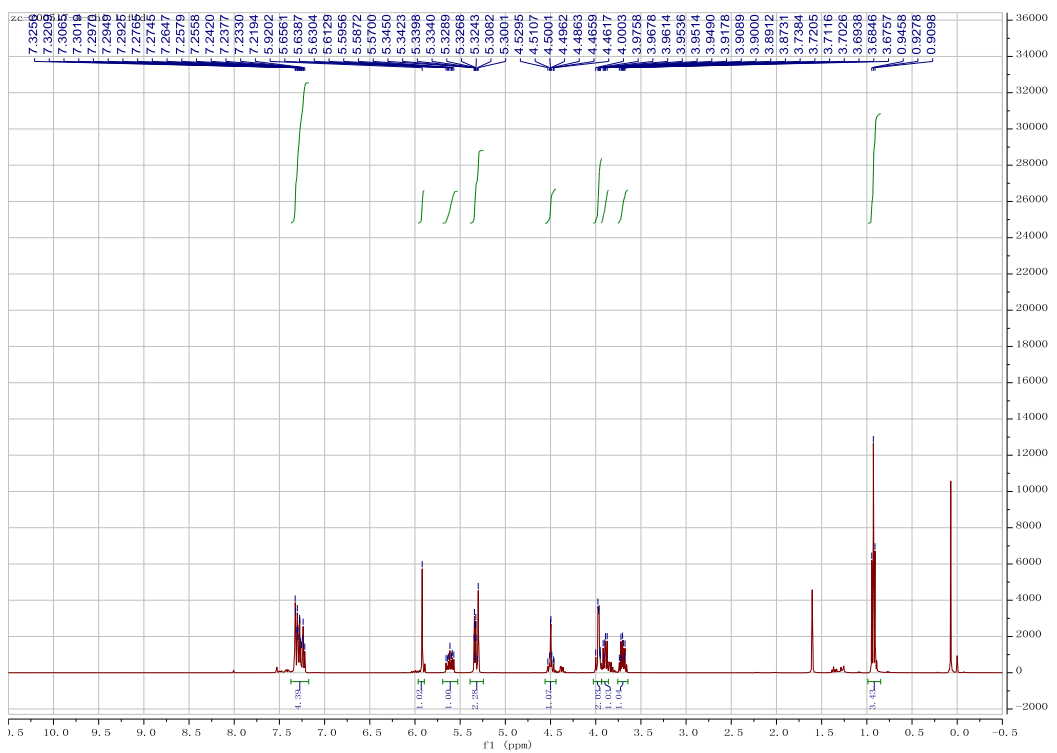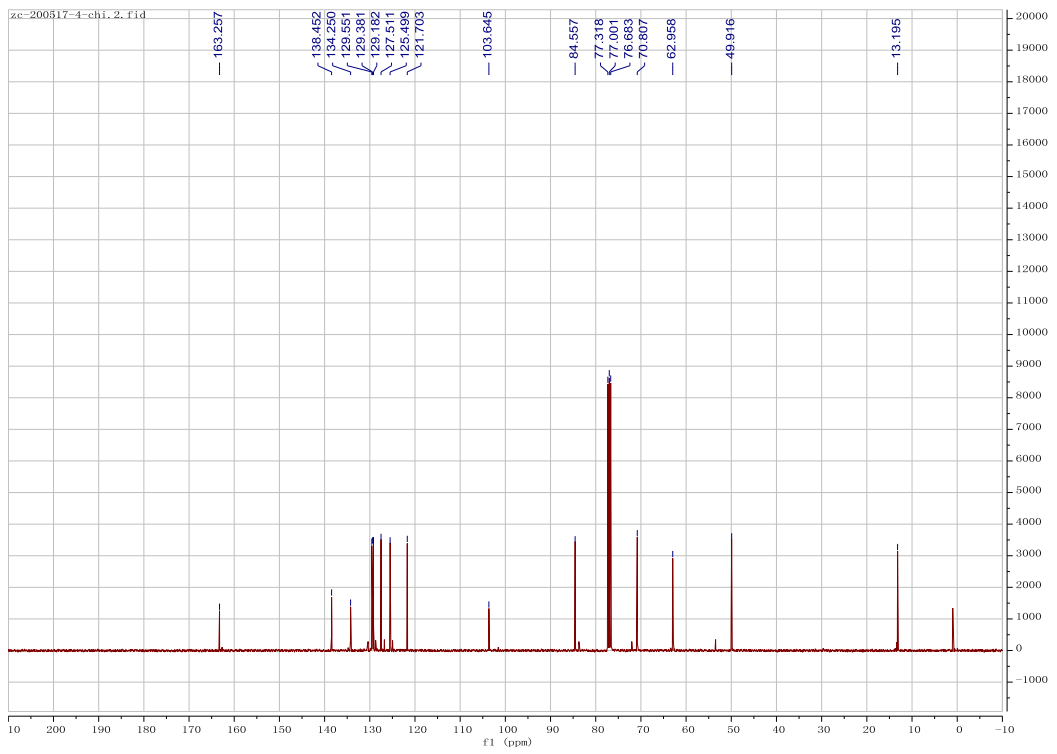

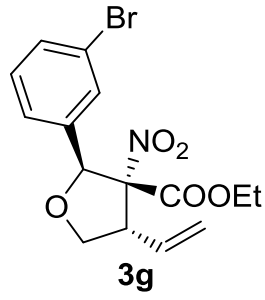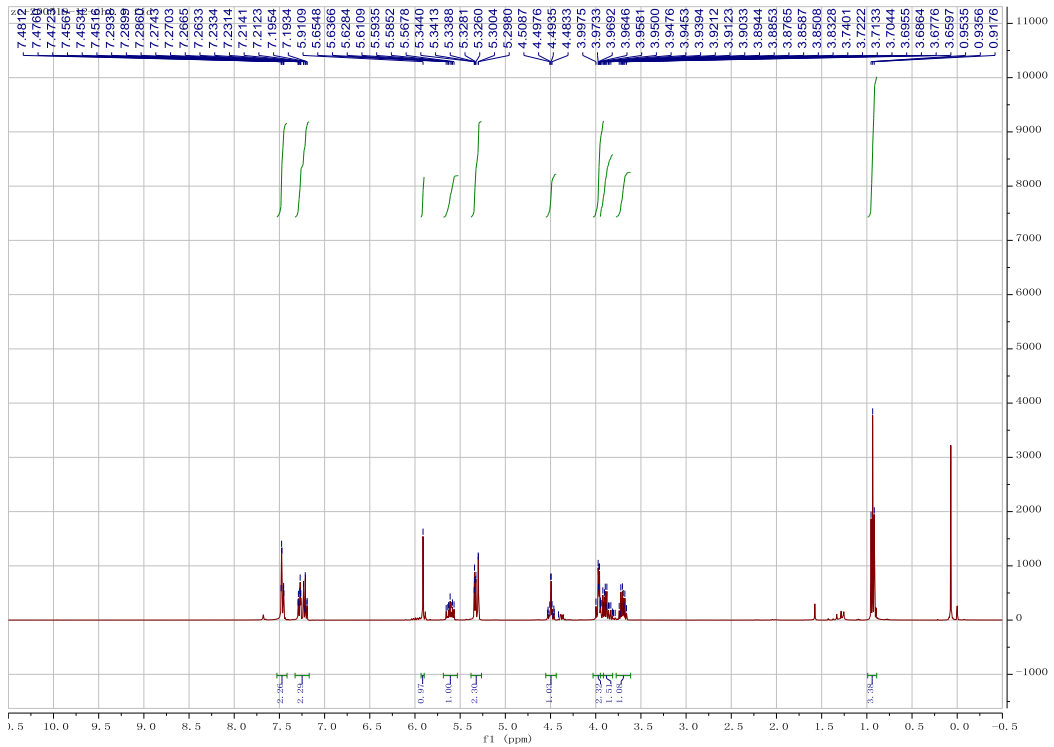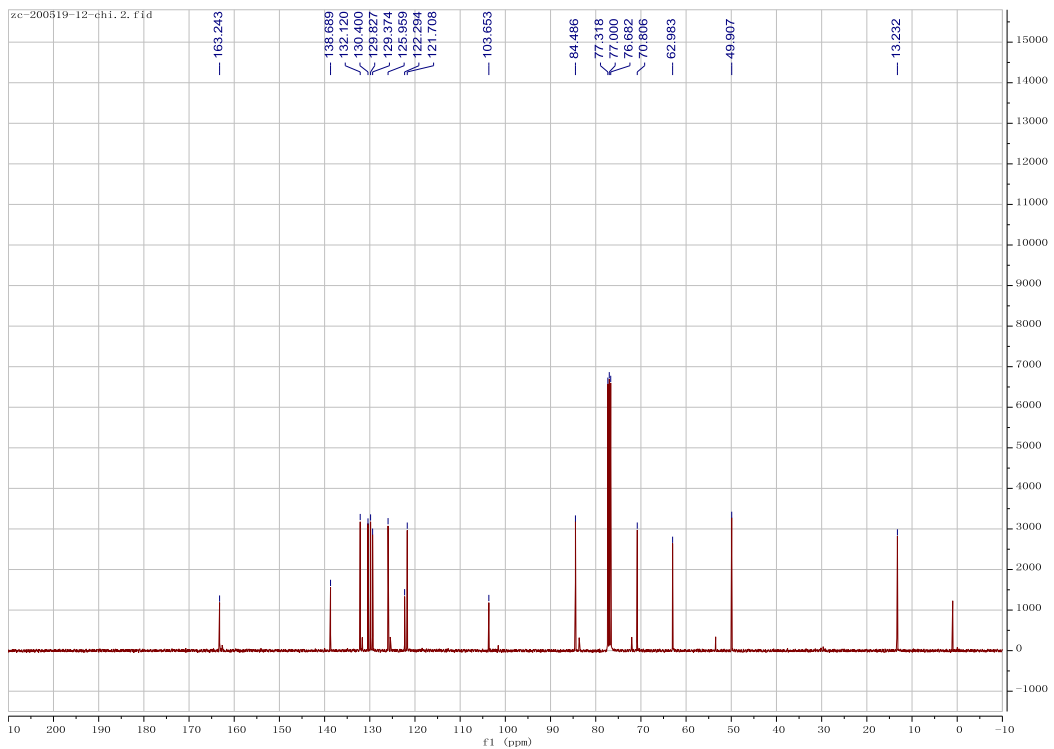

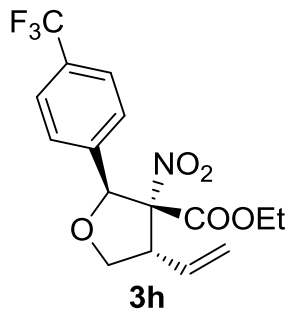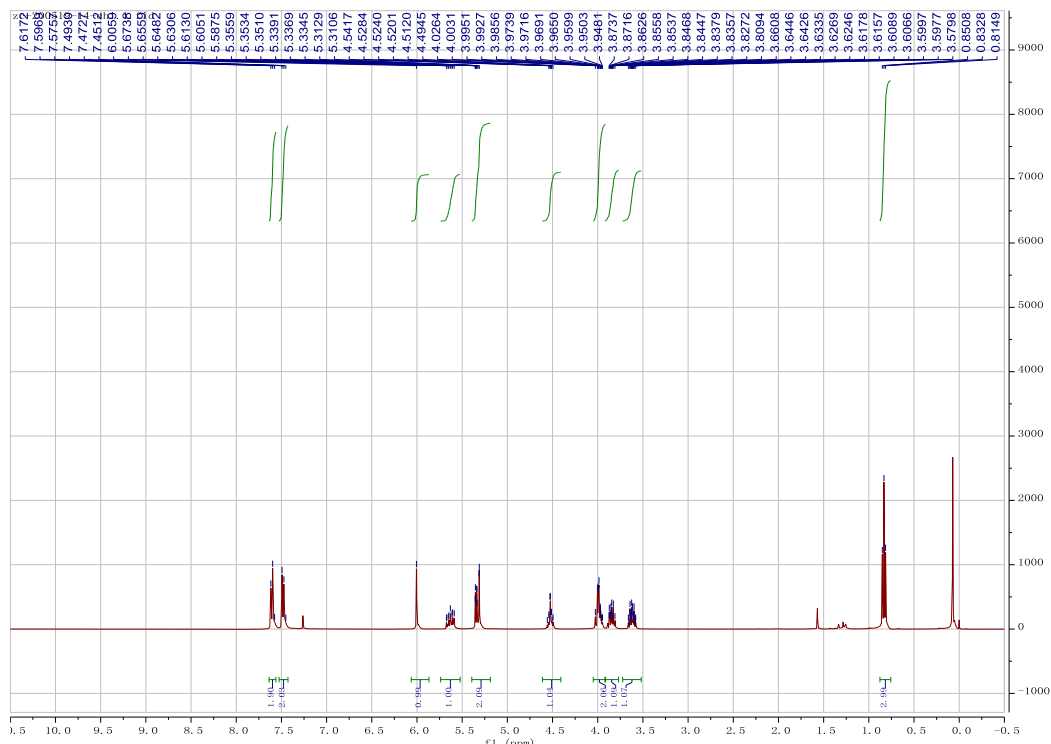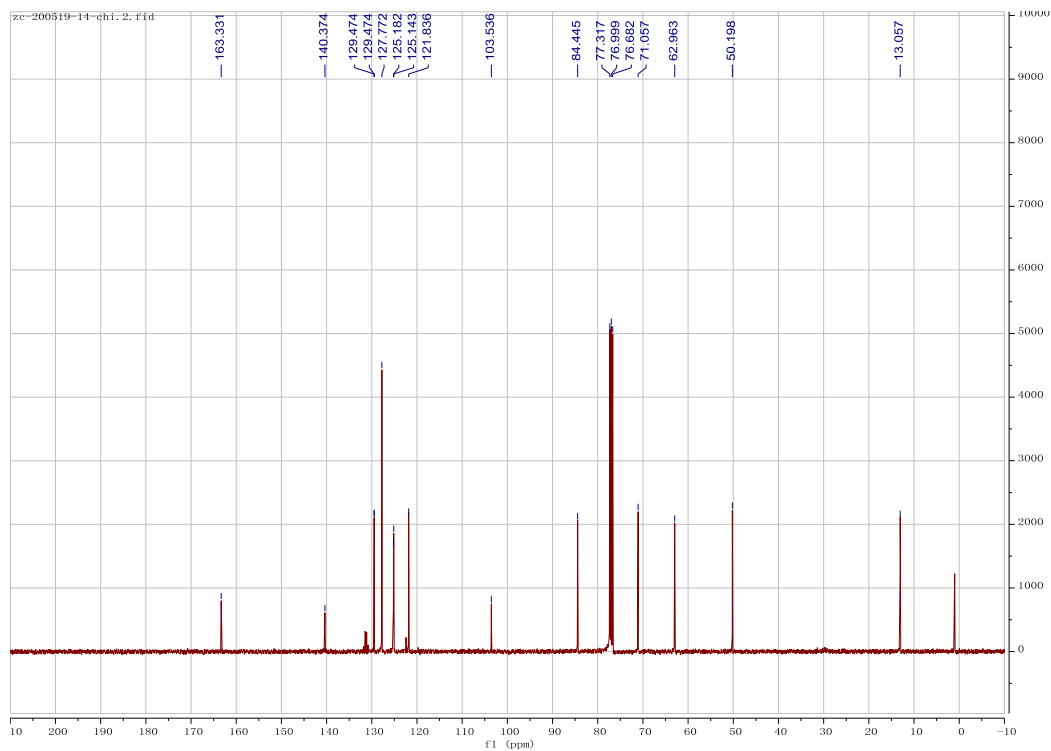

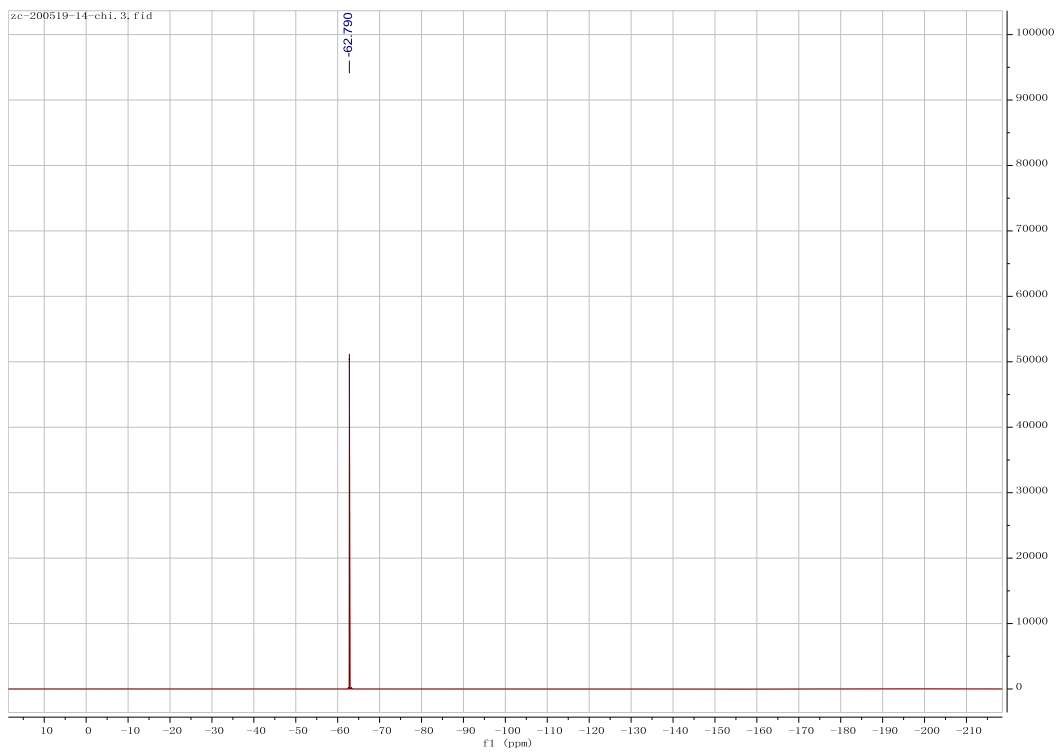

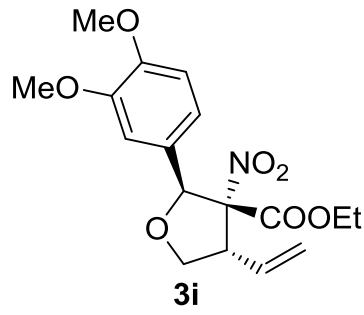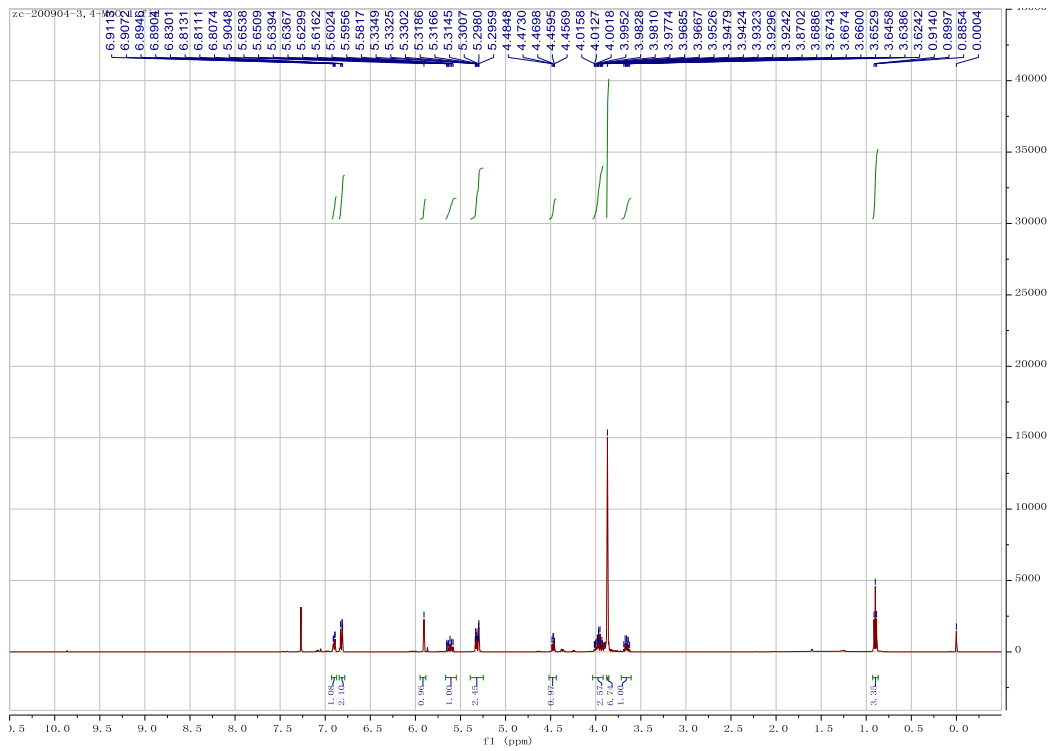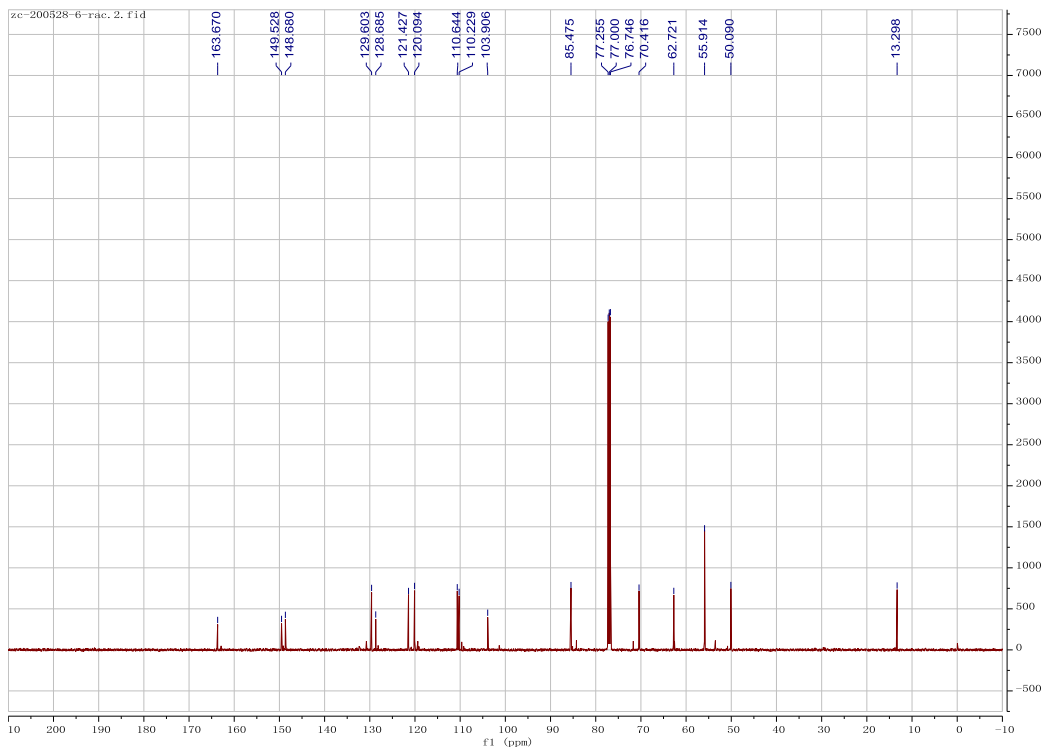

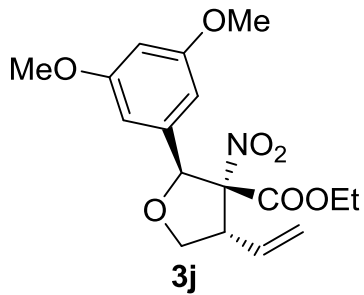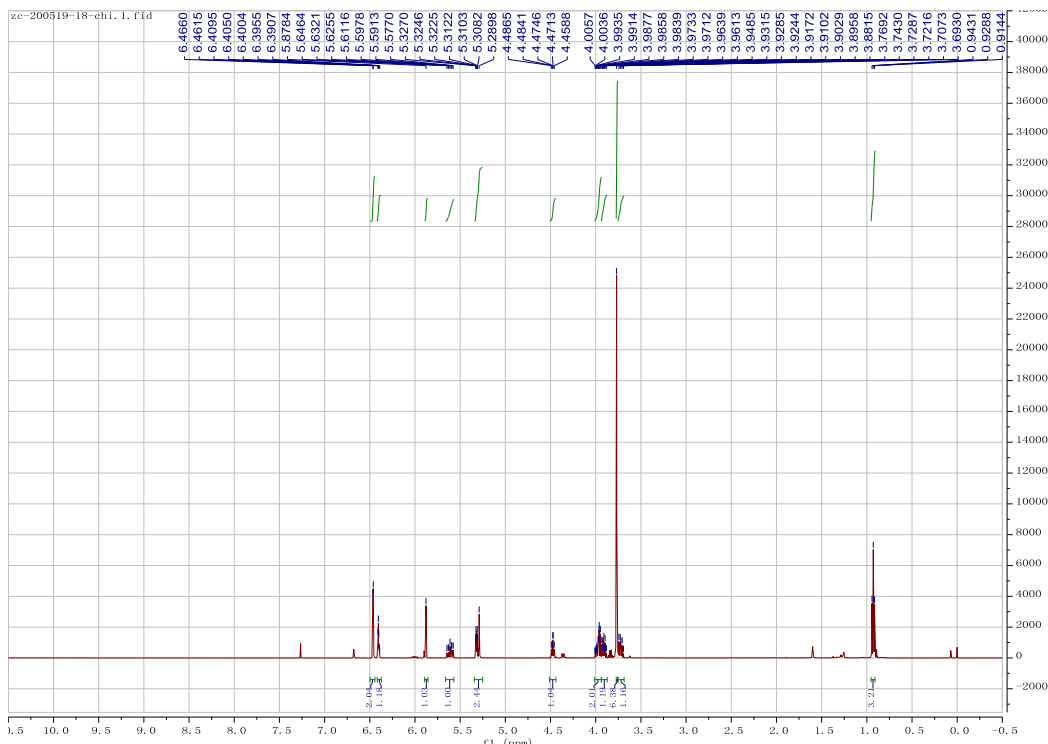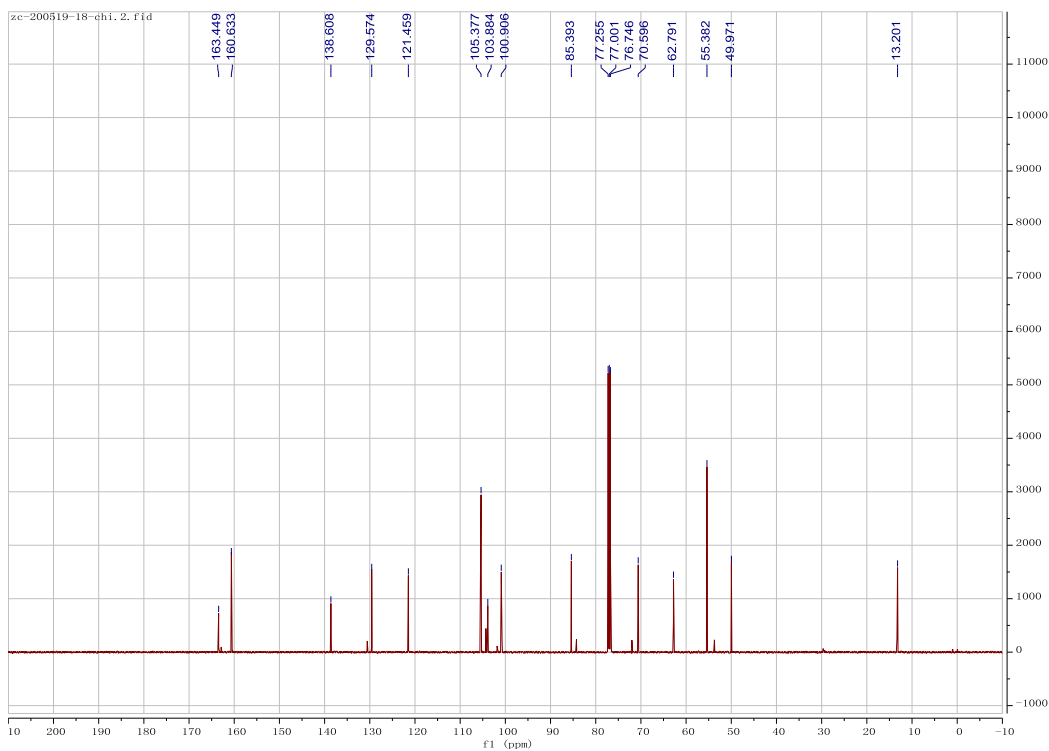



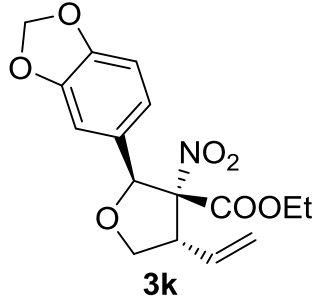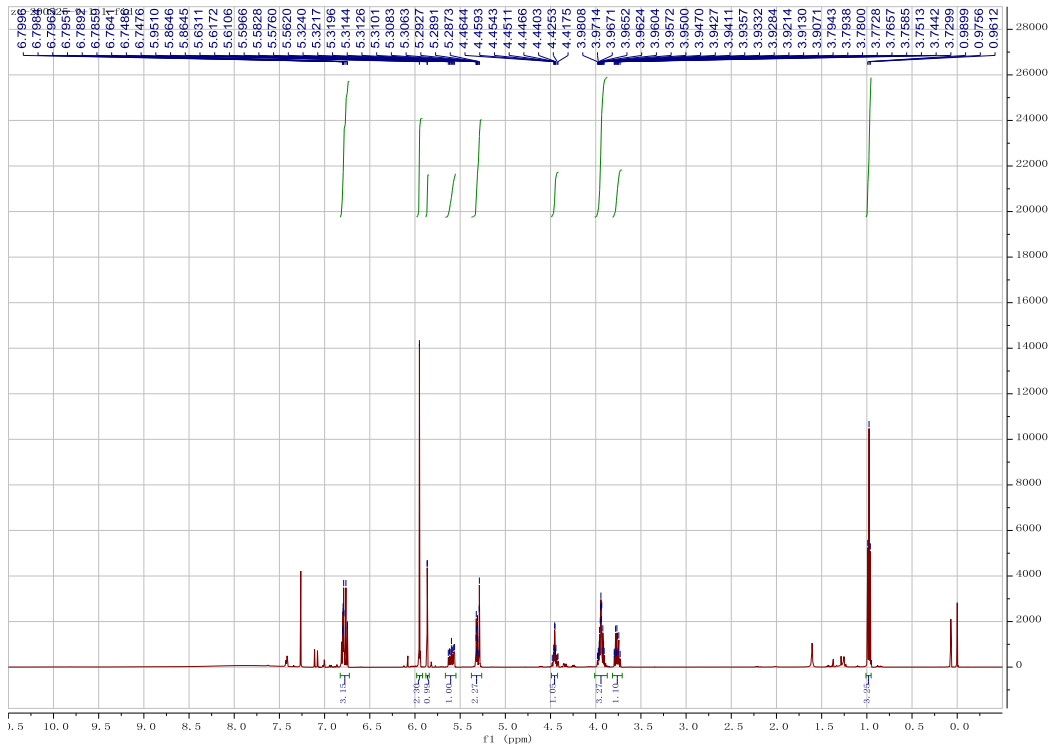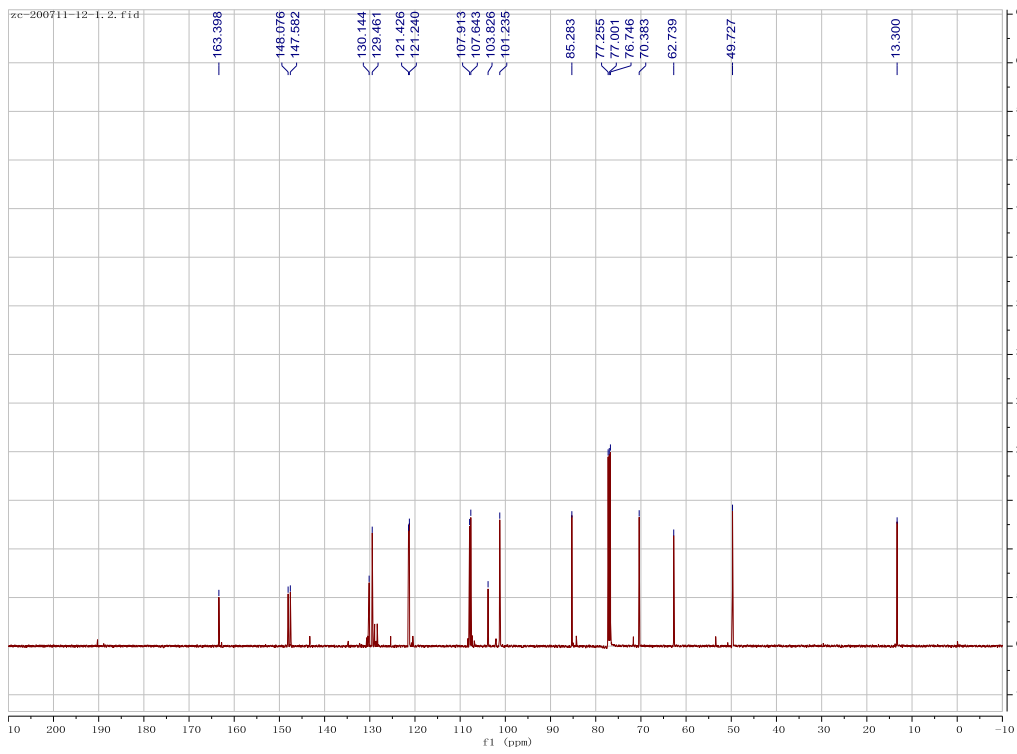

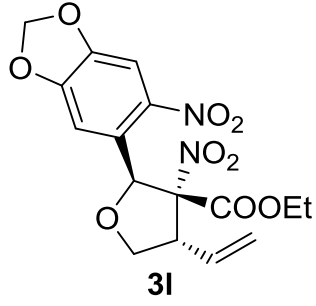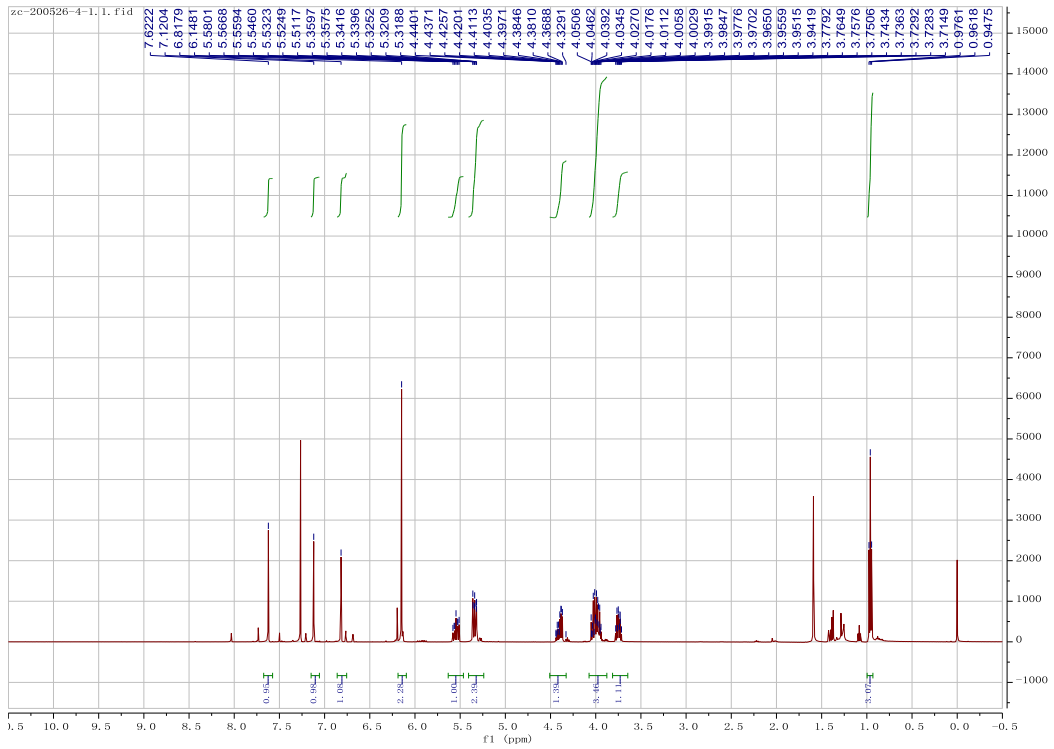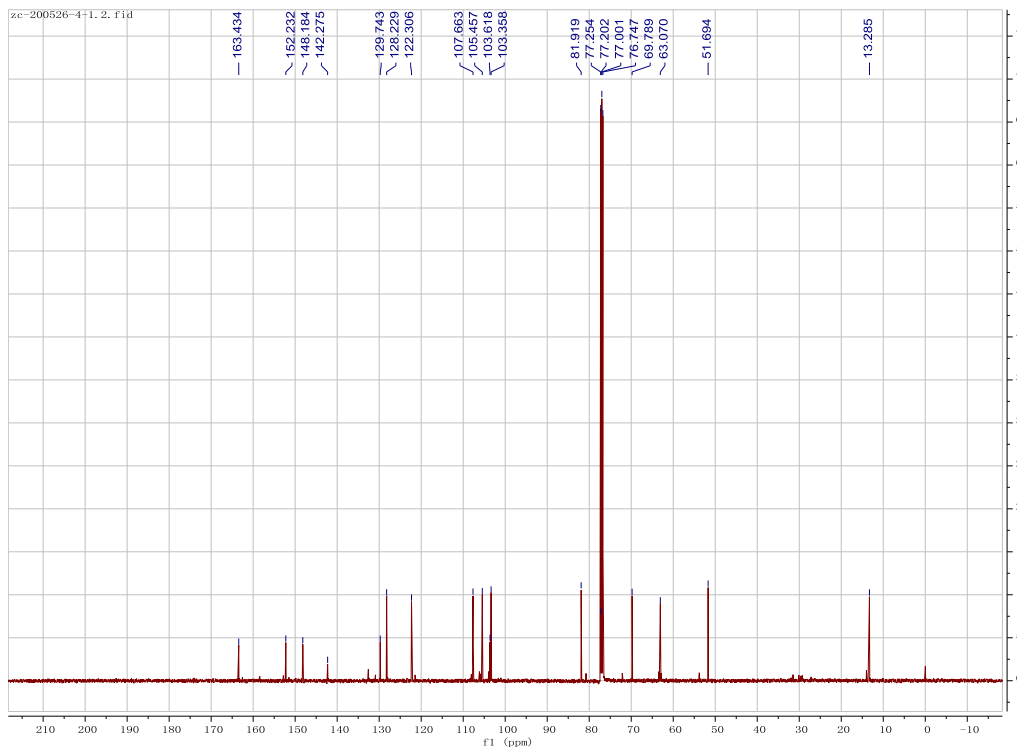

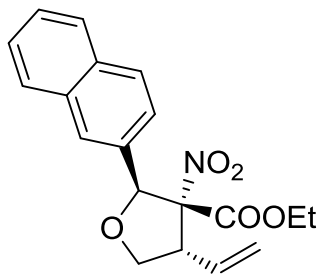

**3m**

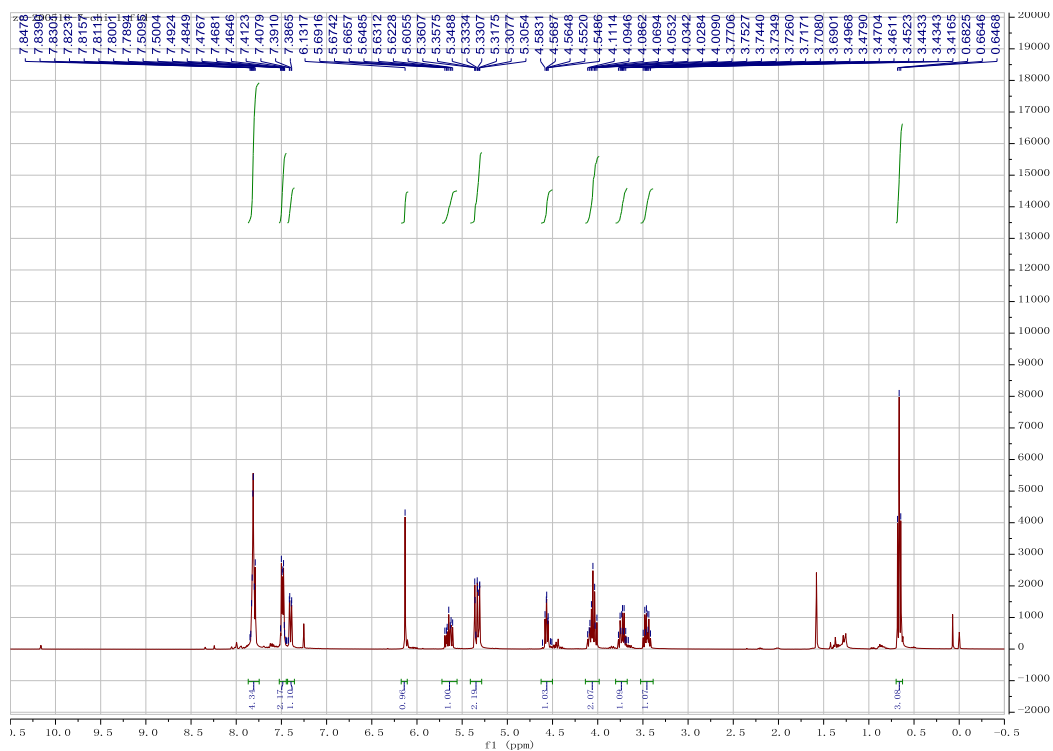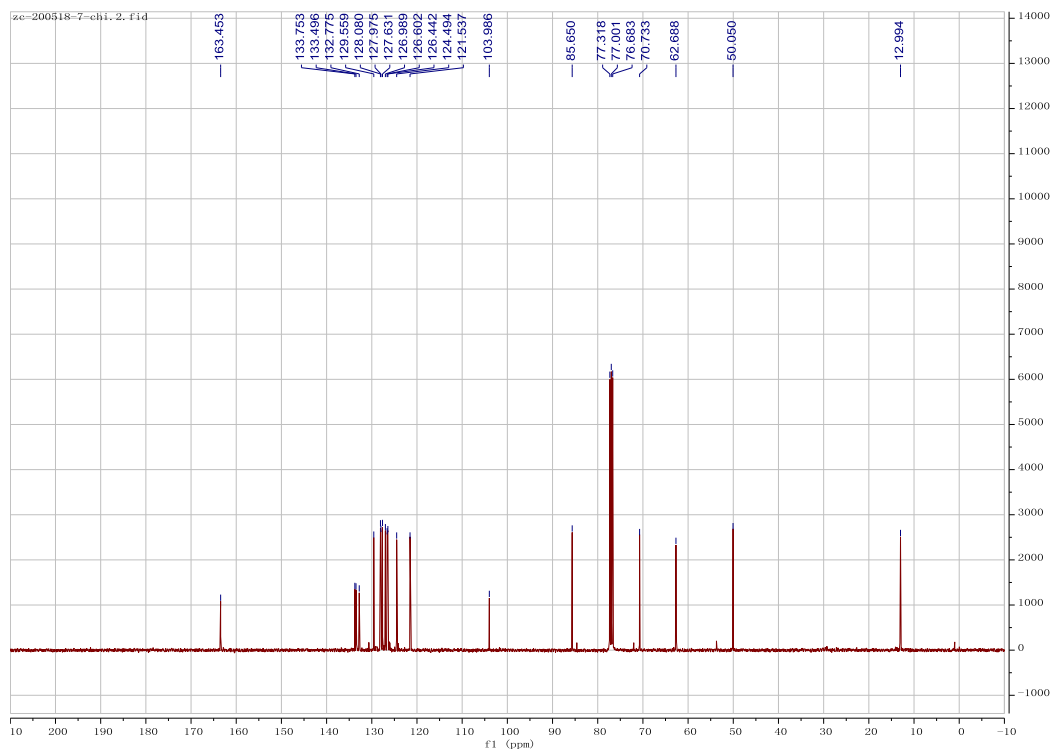

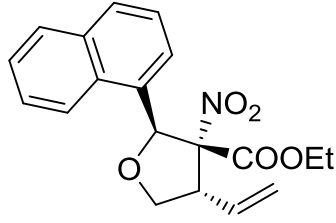

**3n**

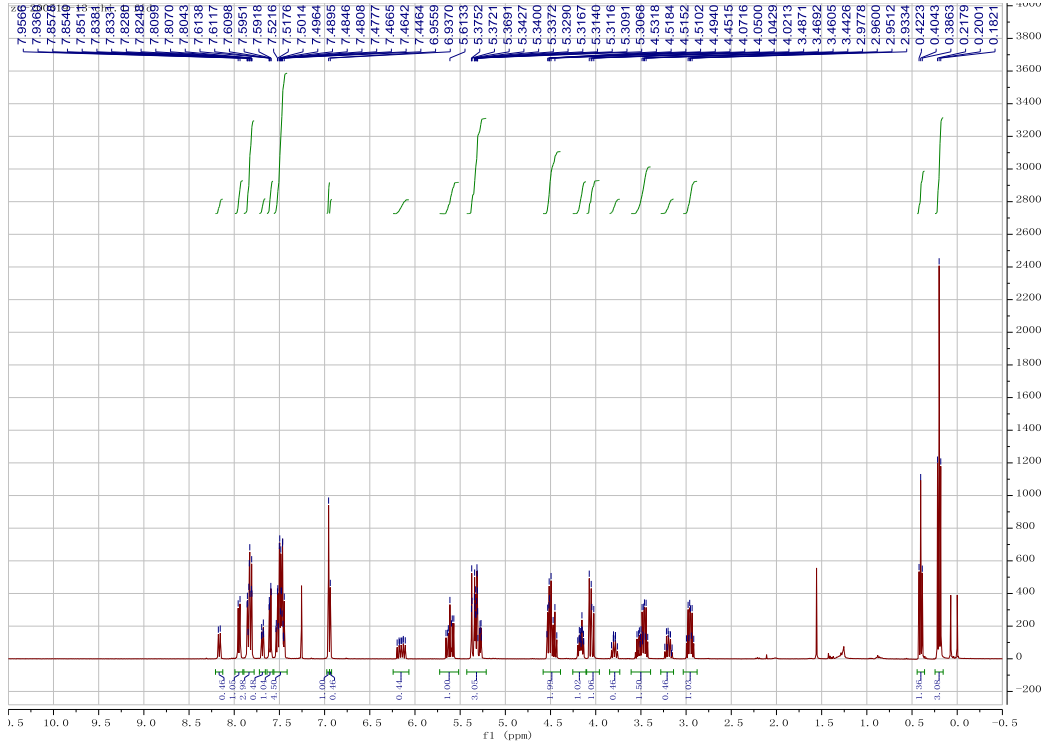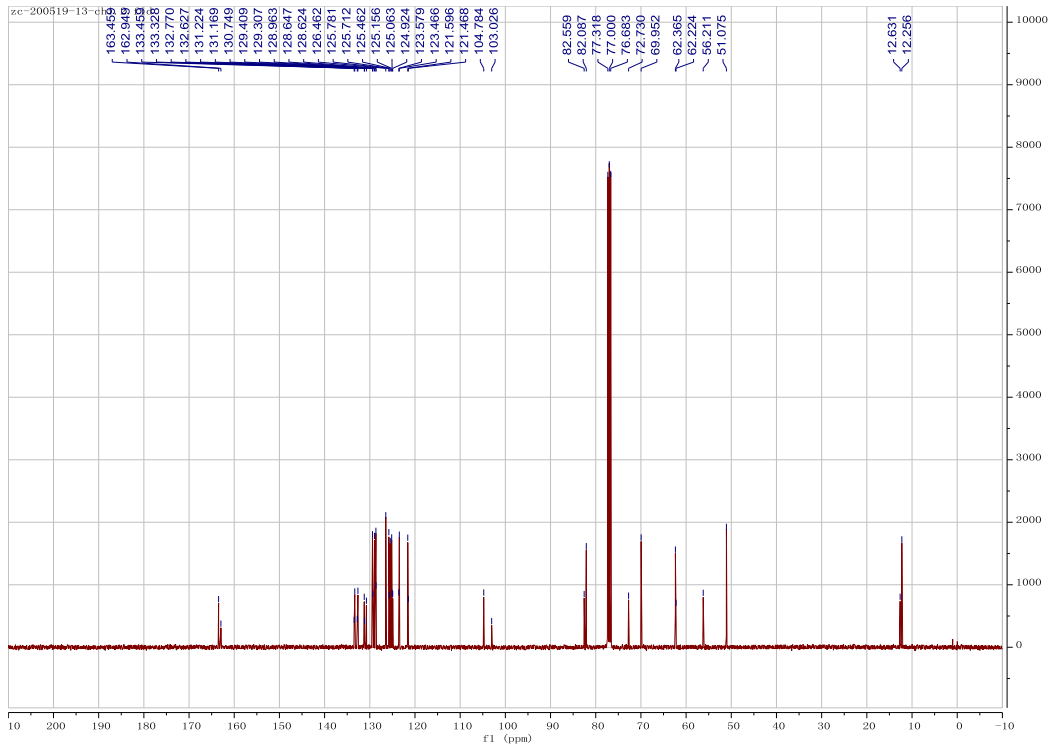

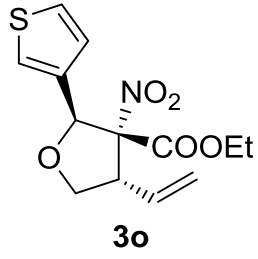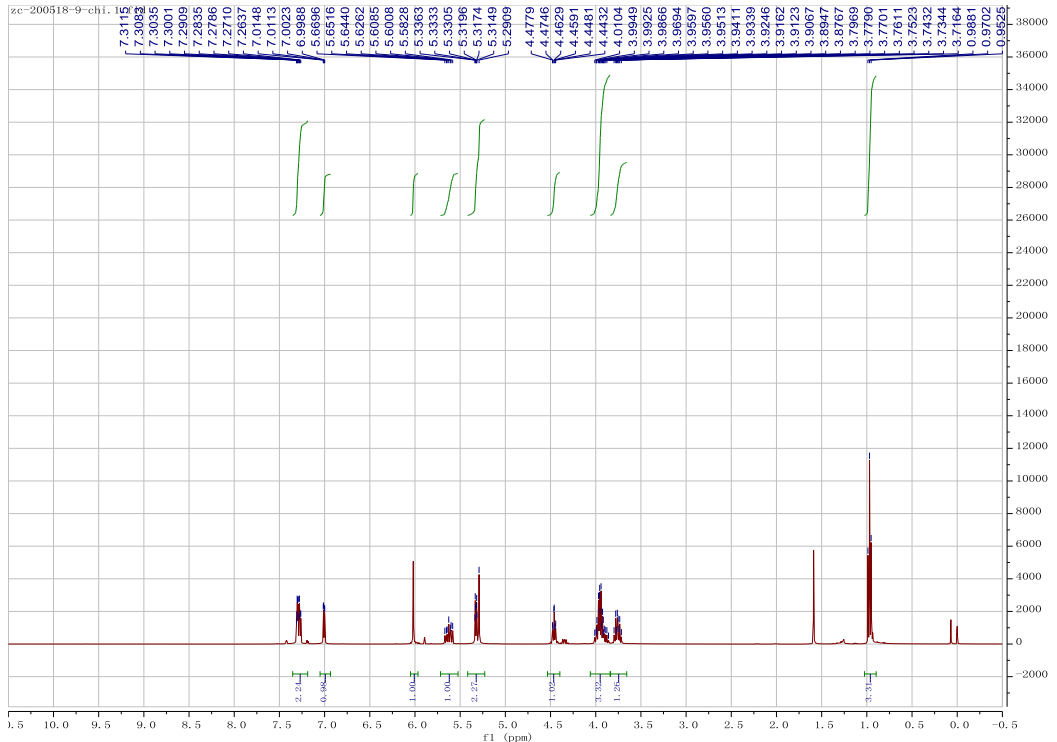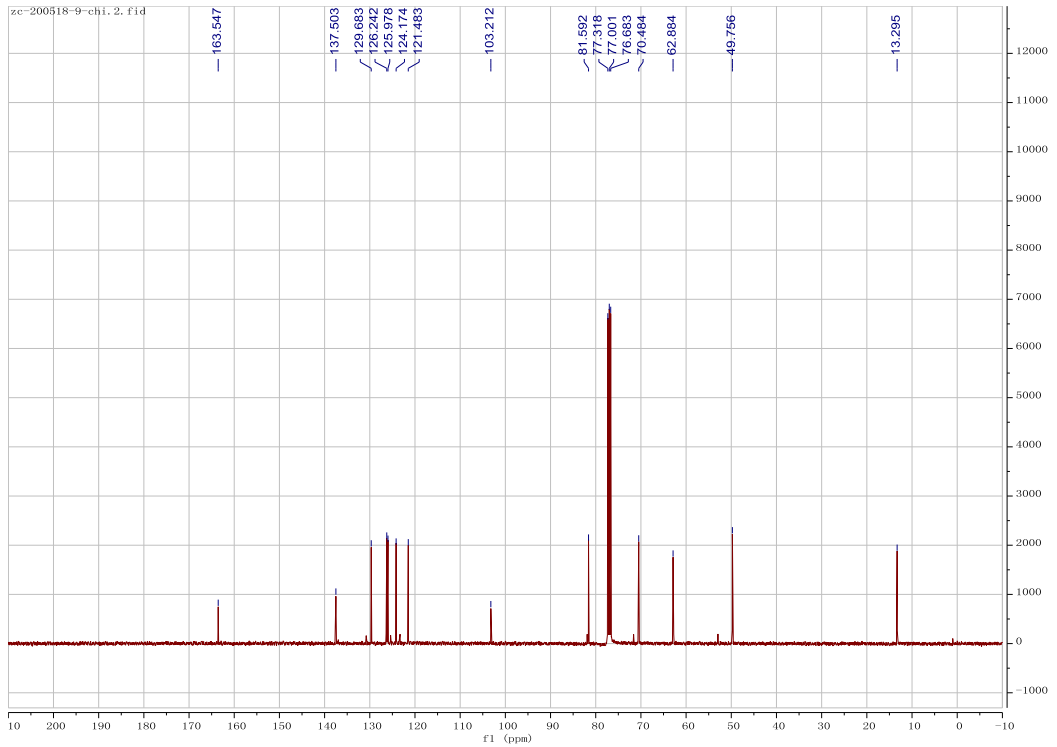

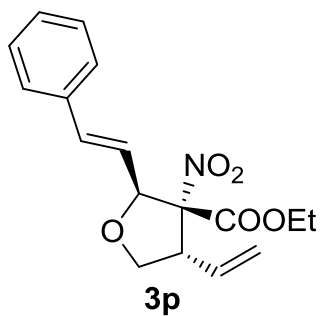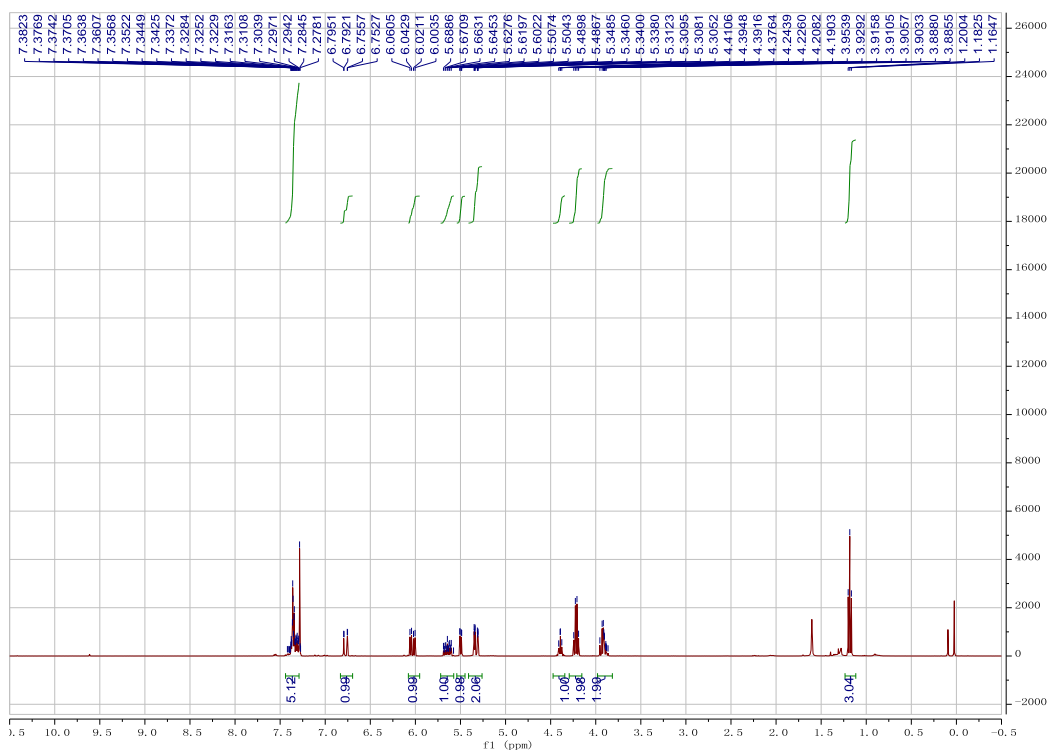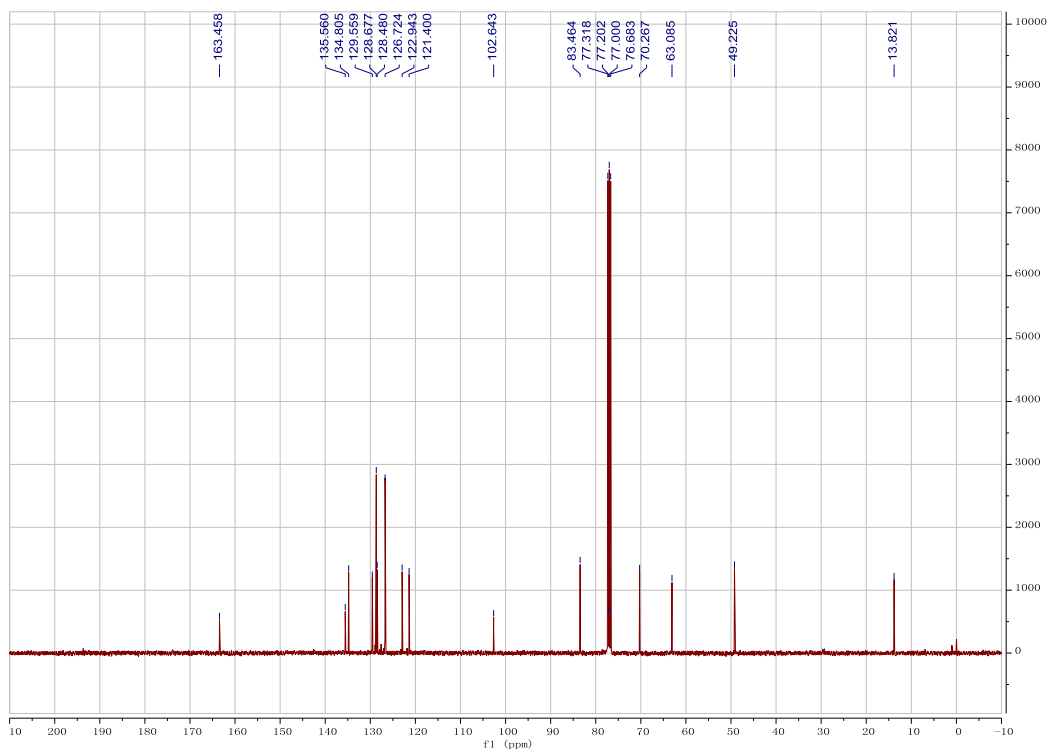

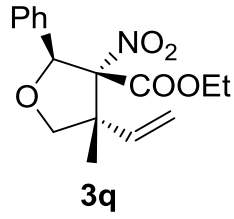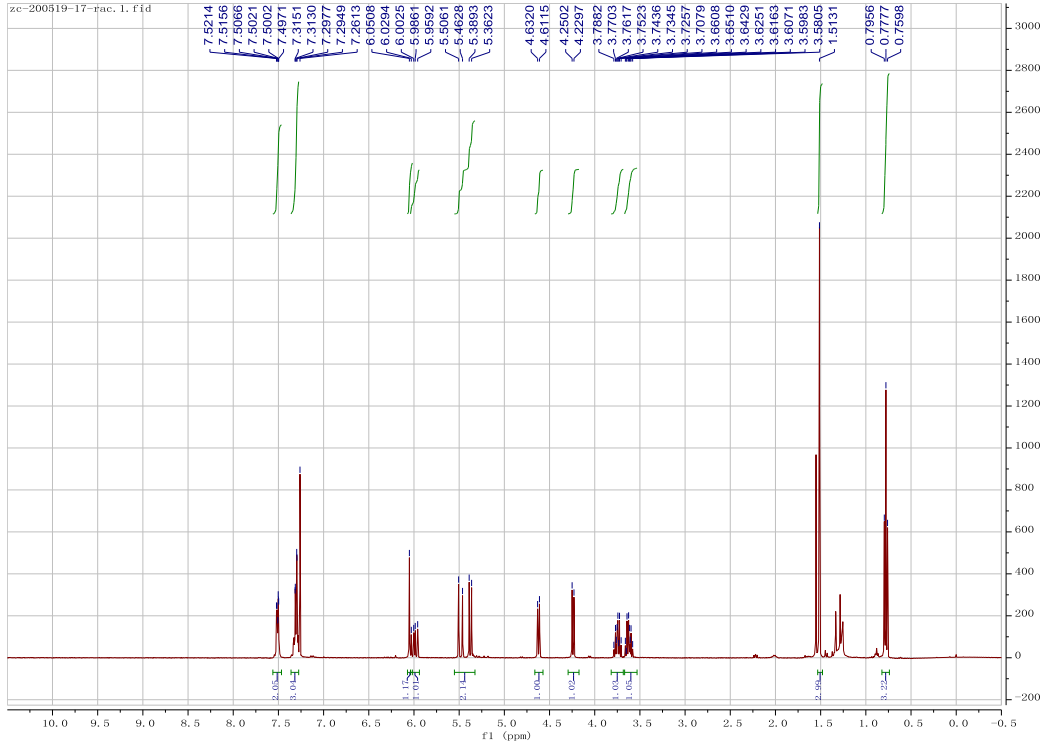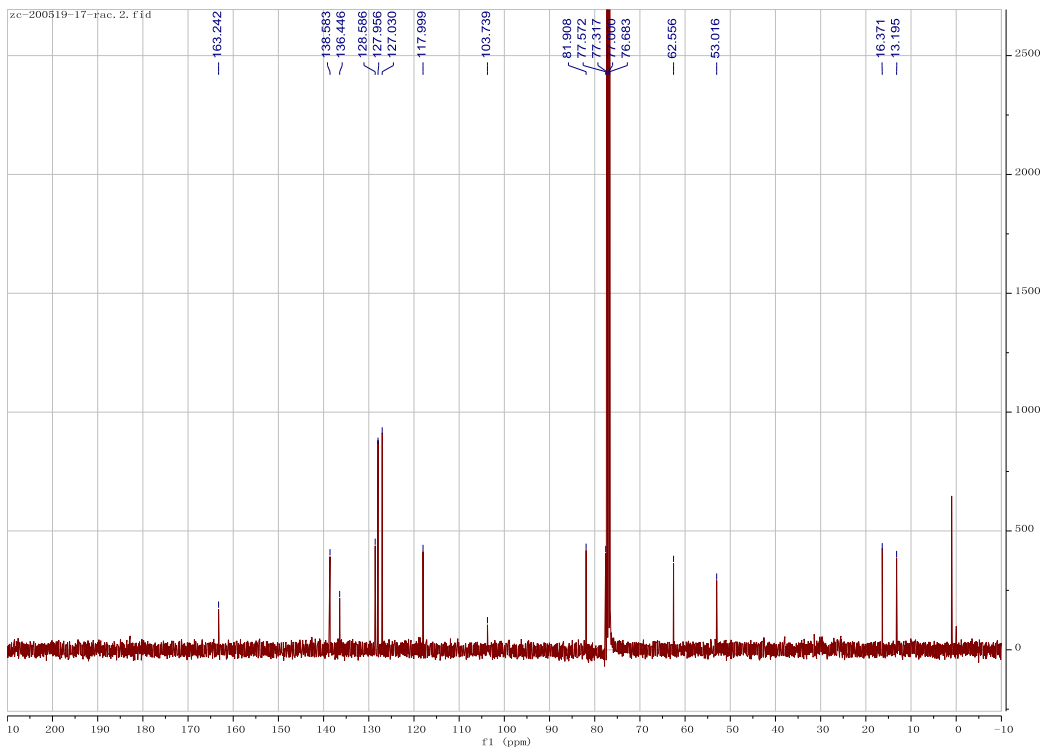

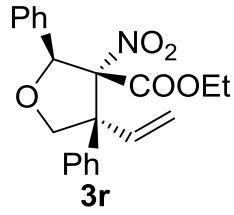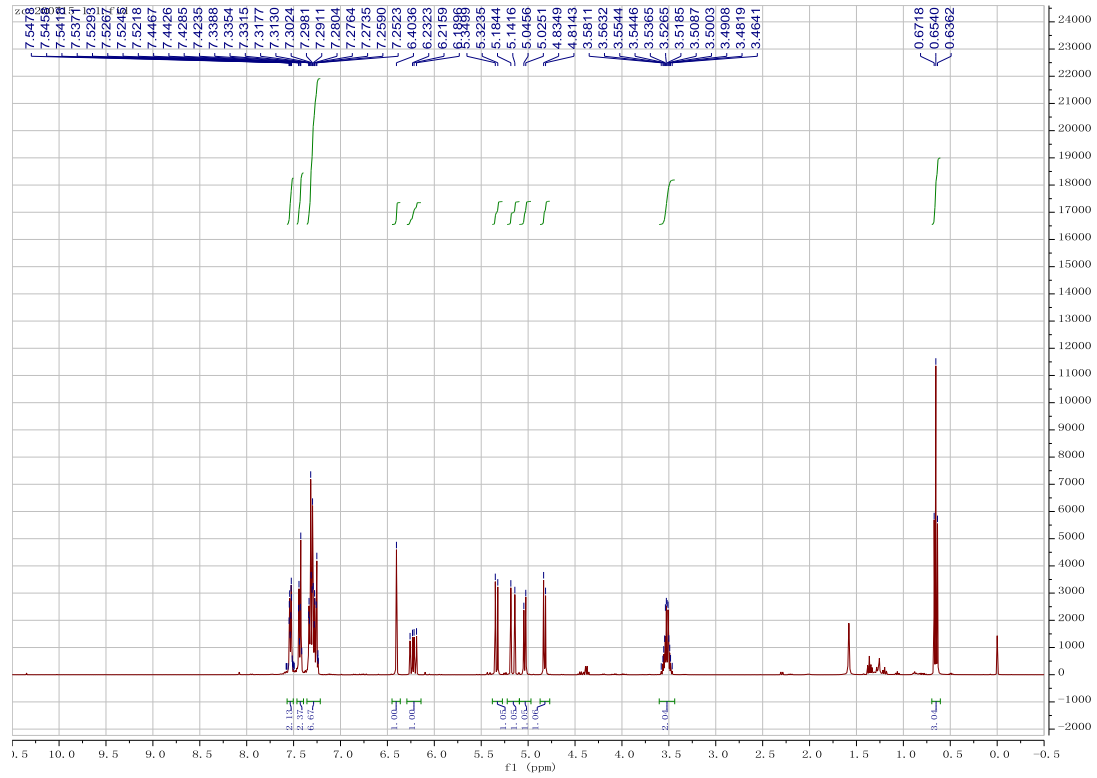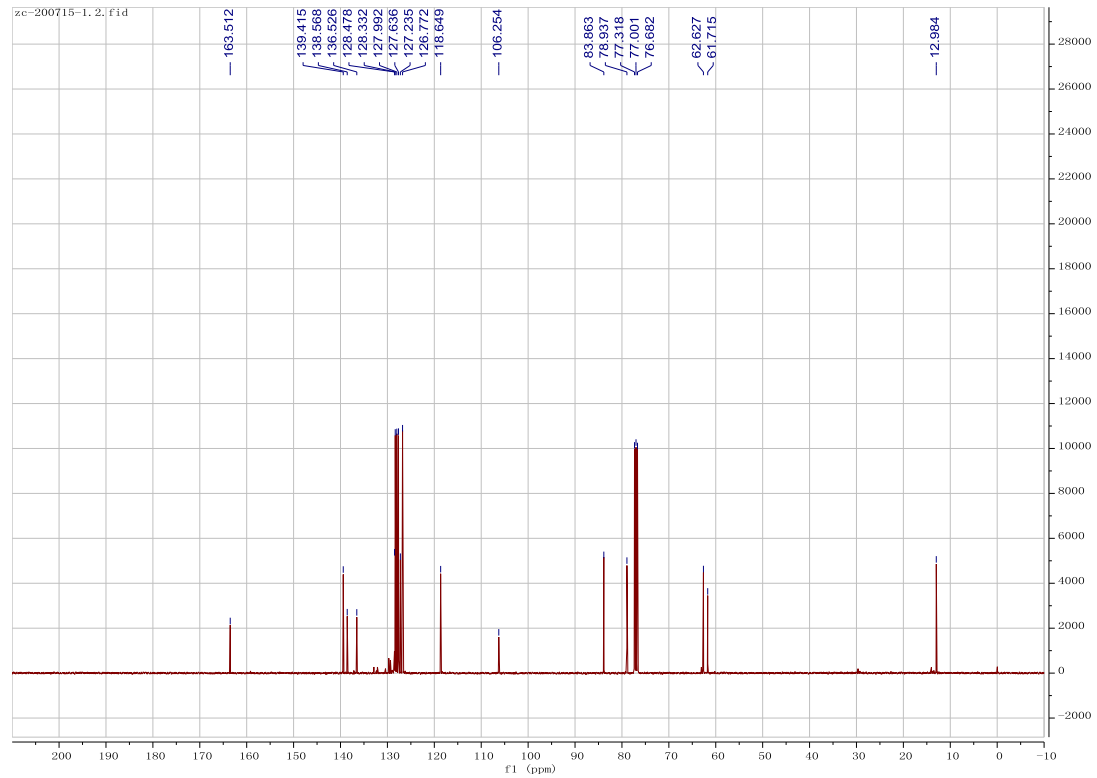



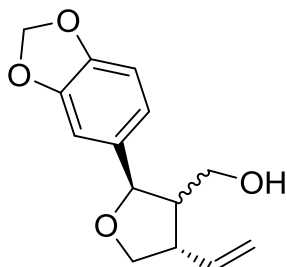

4

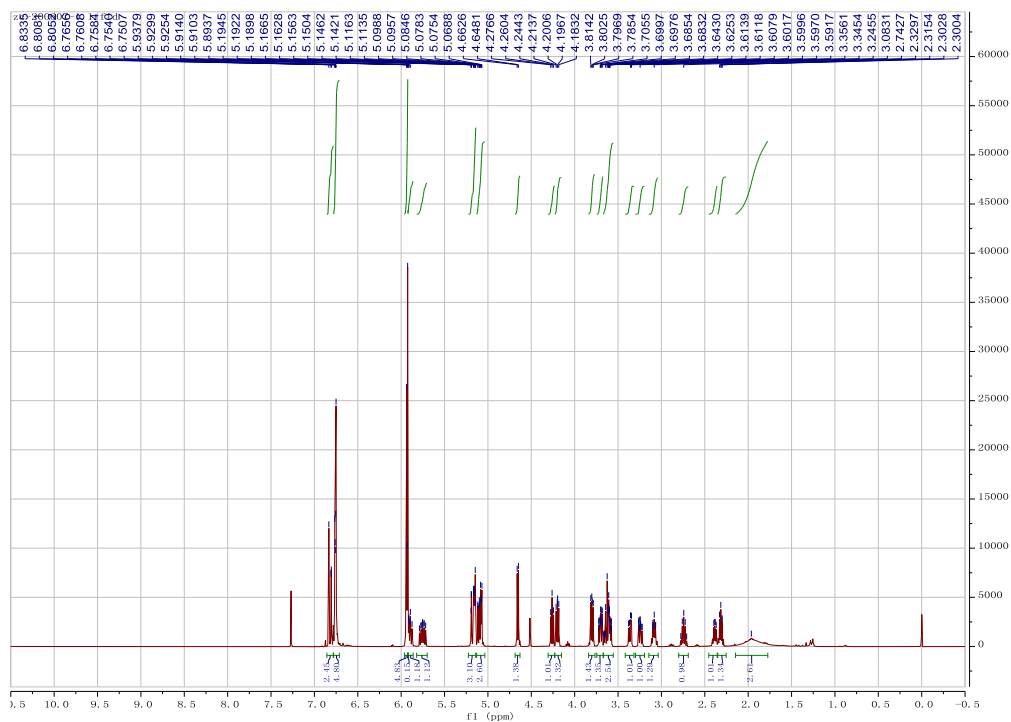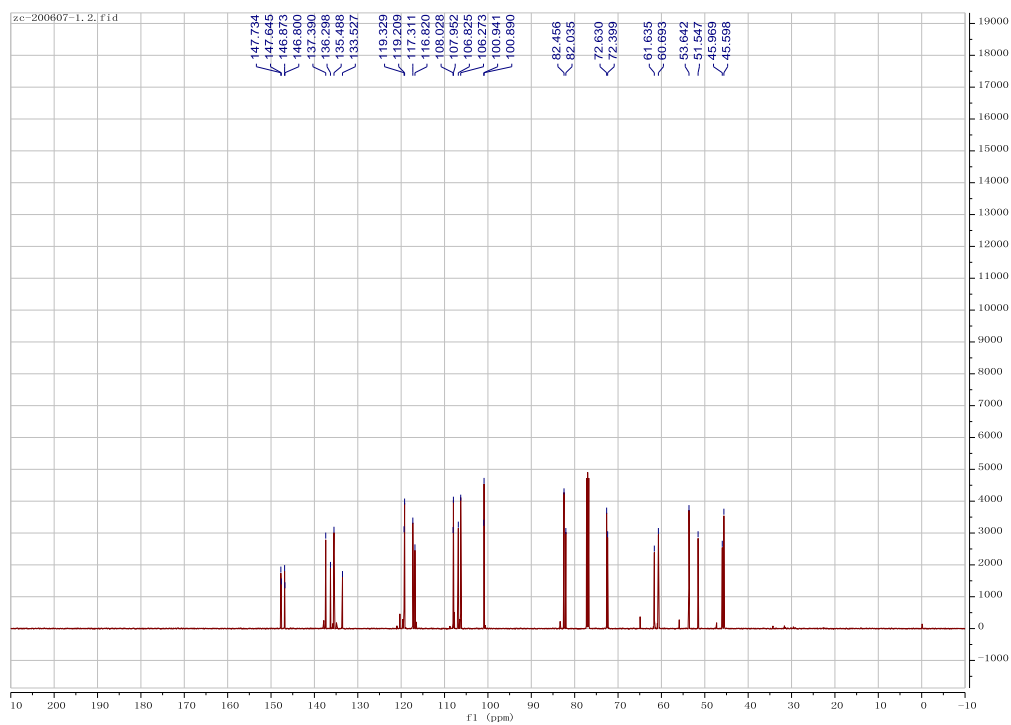

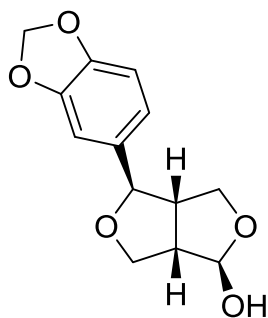

**(-)-samin**

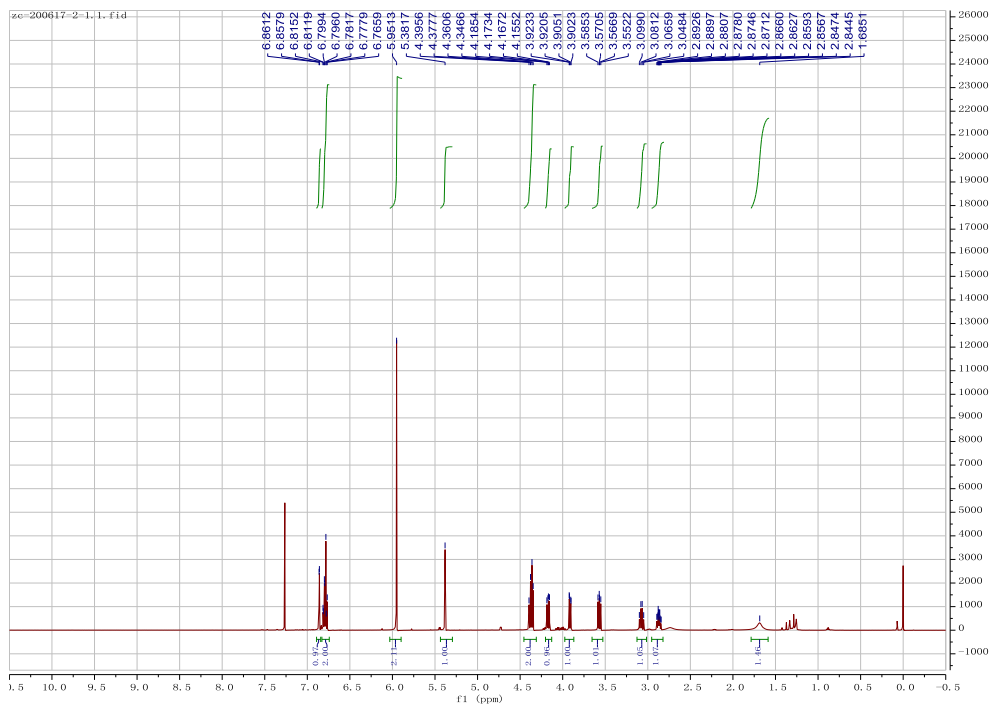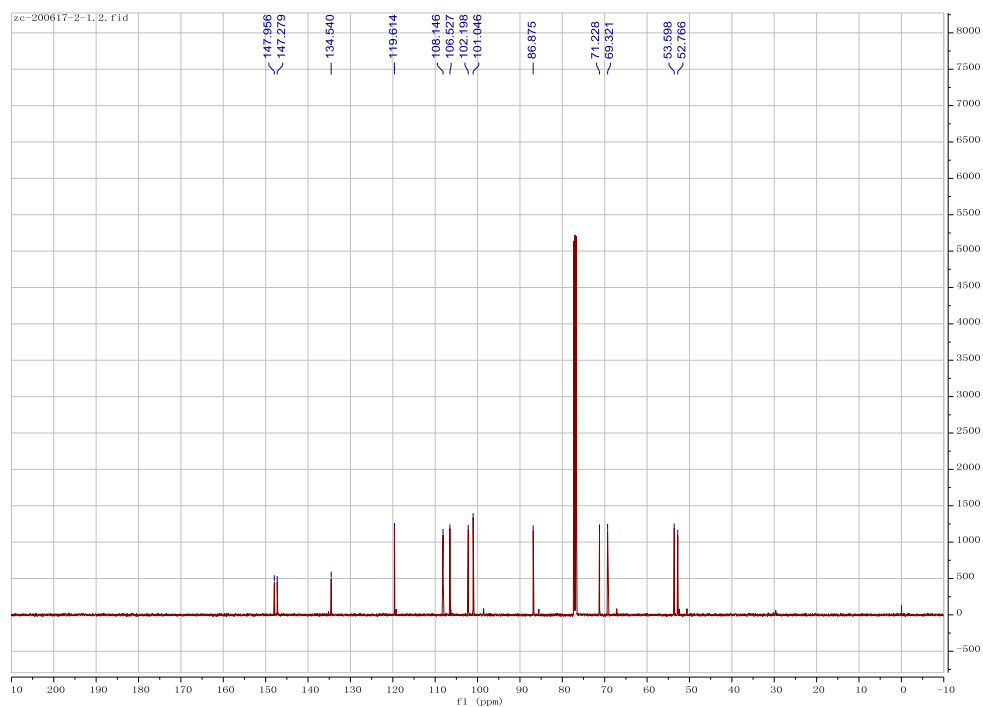

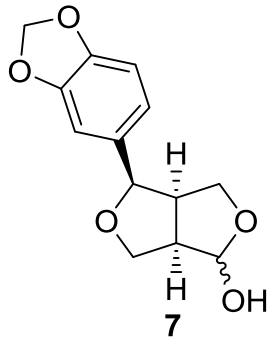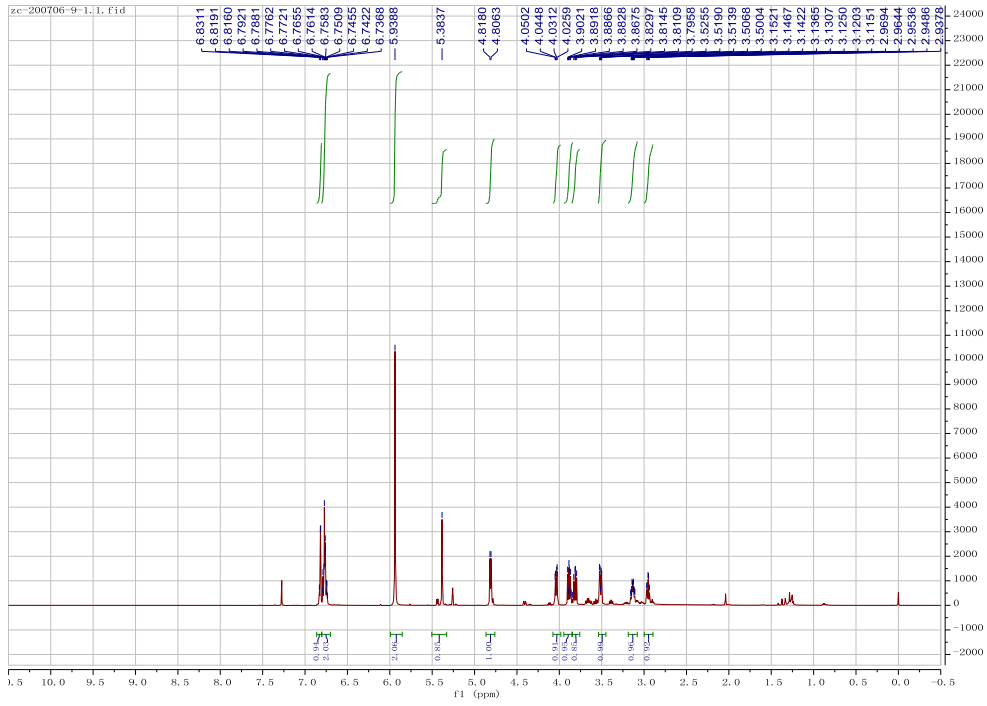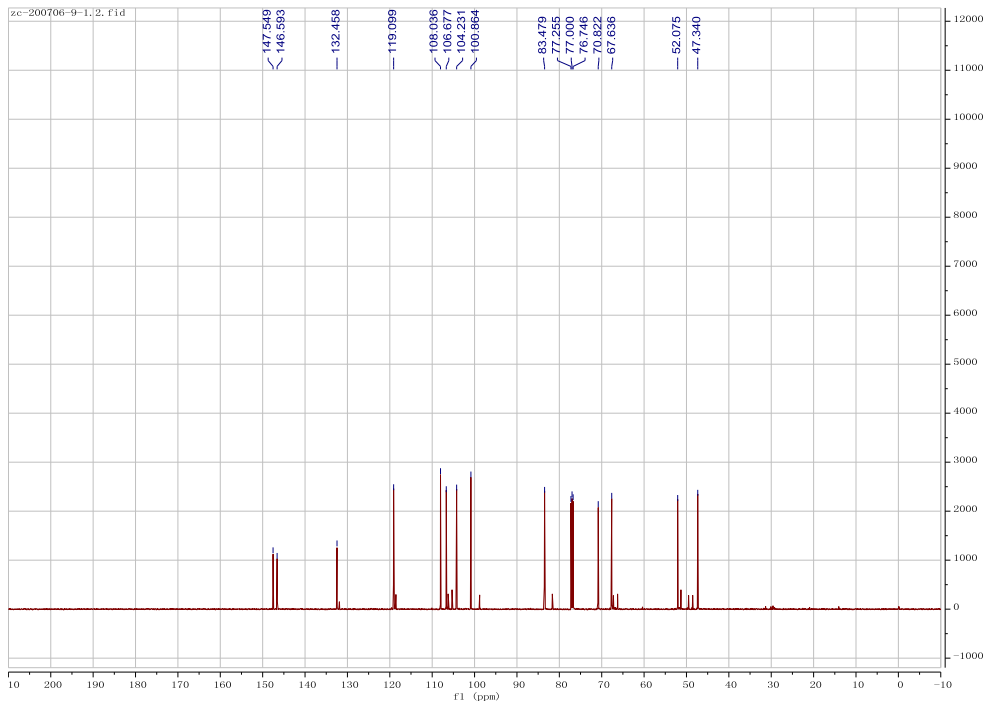

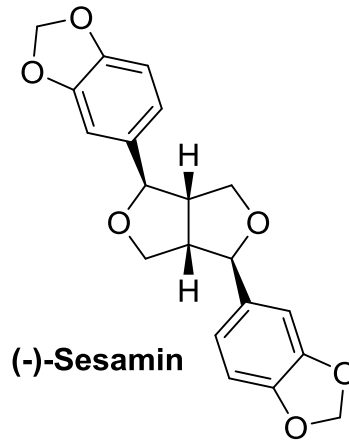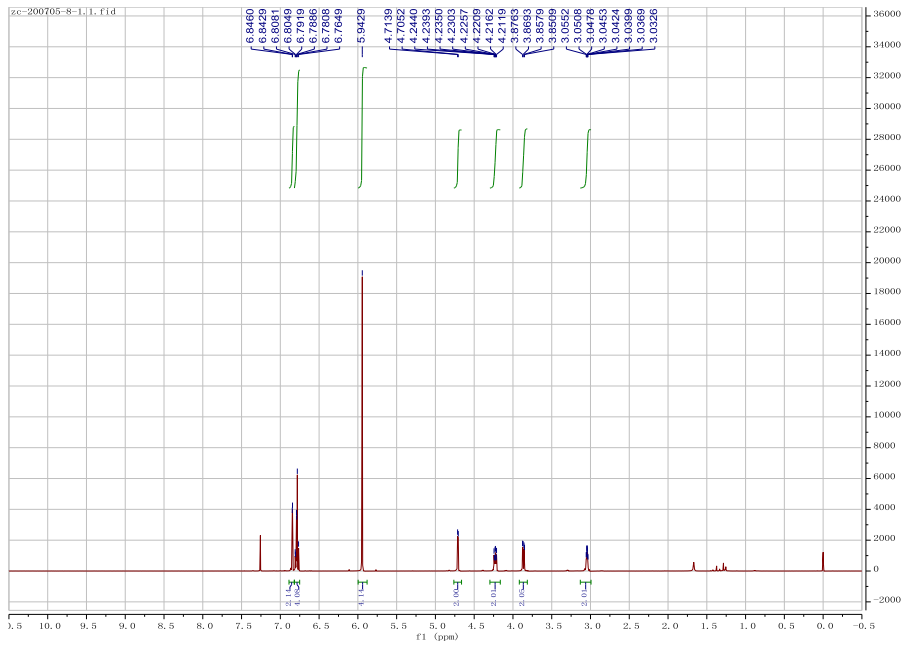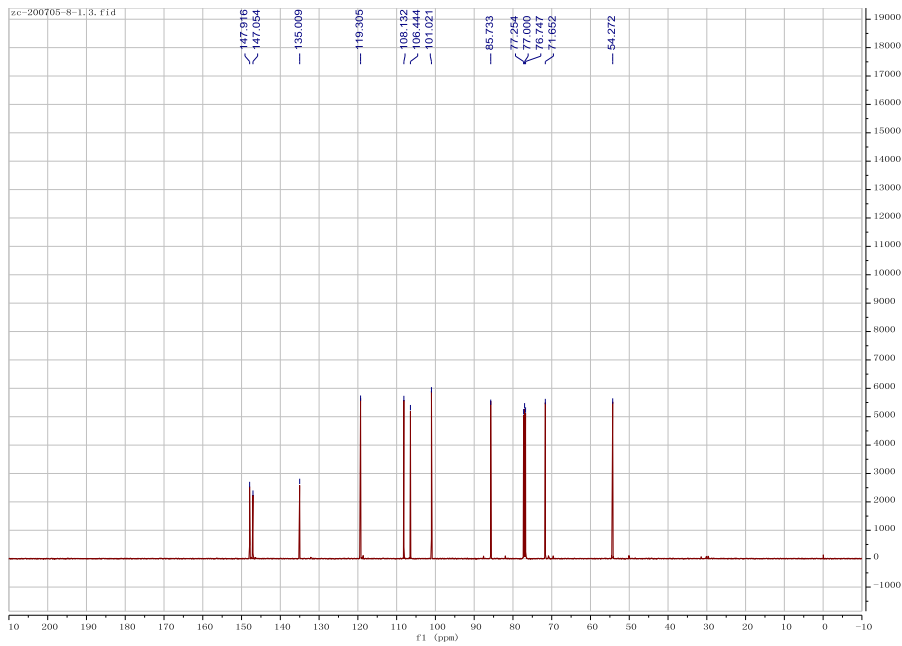

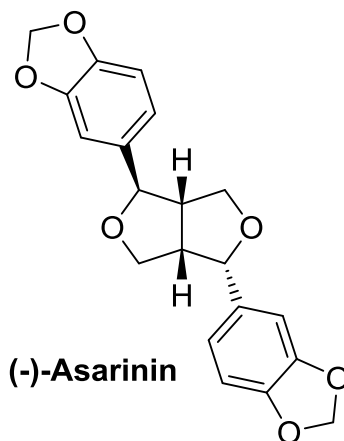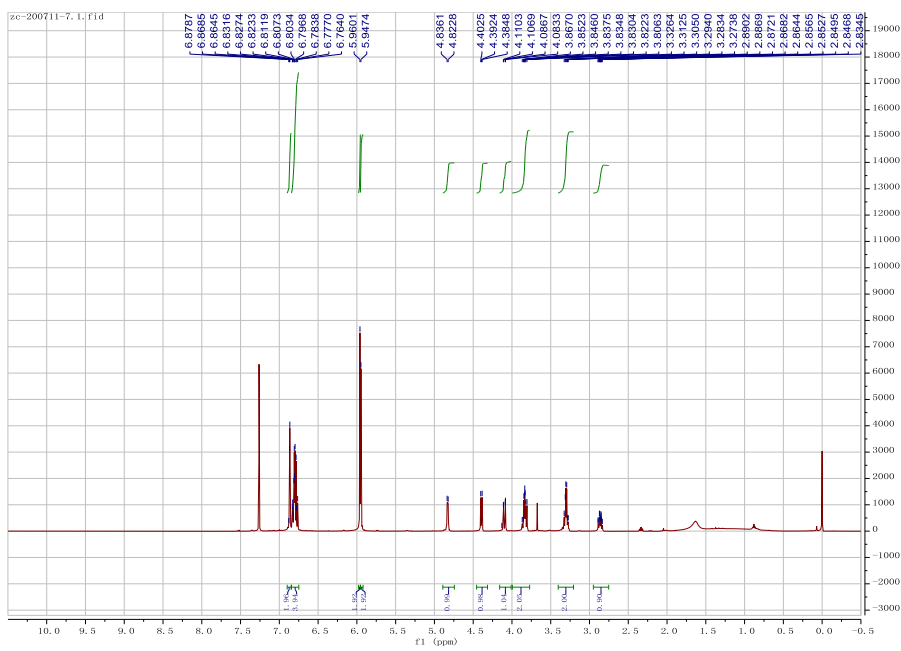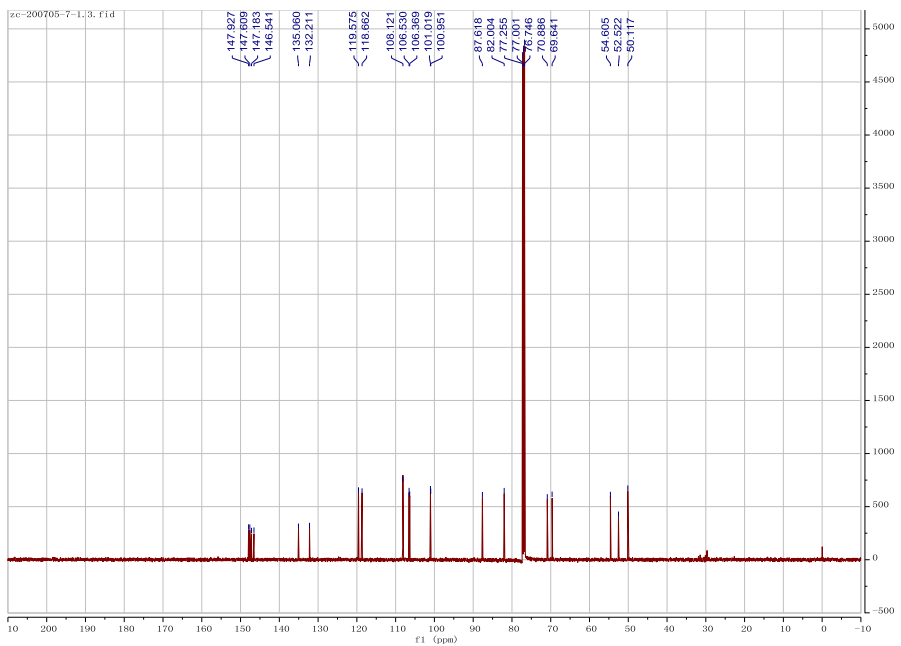

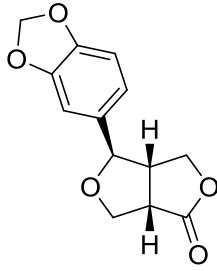

**(-)-Acuminatolide**

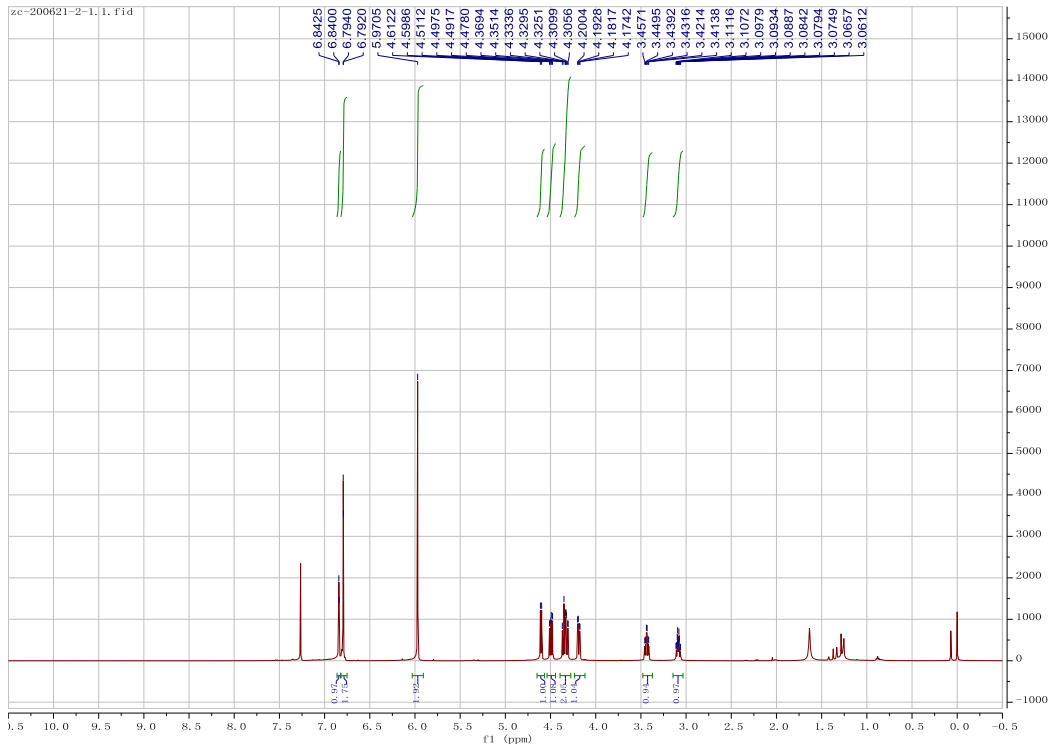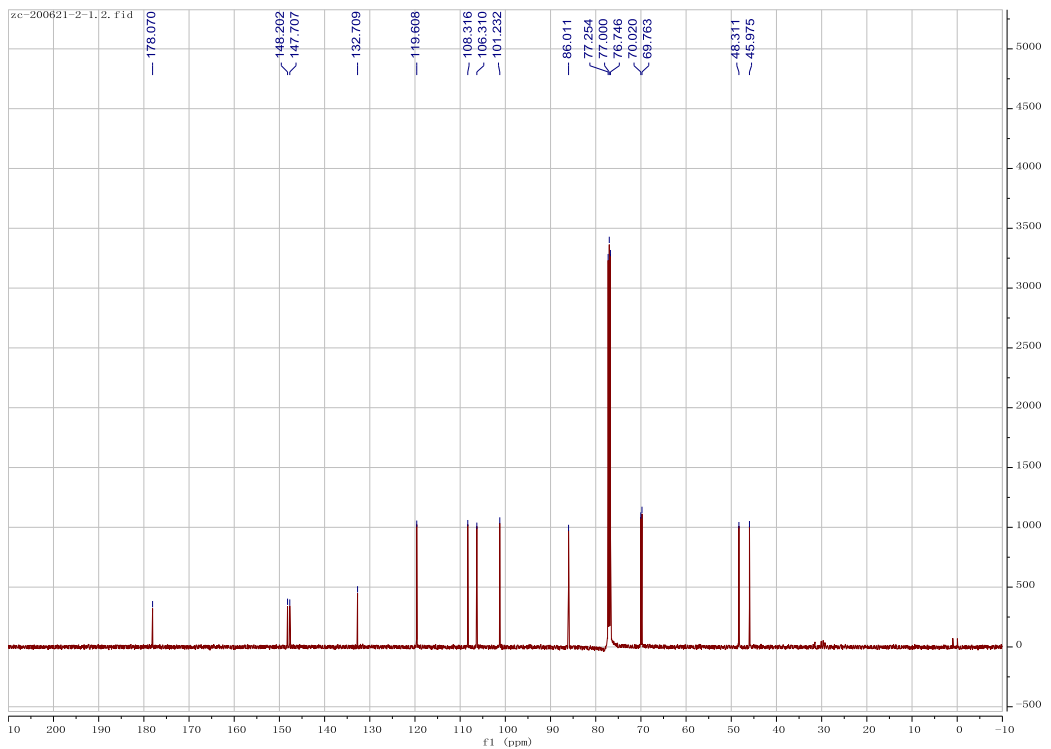

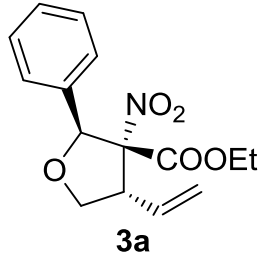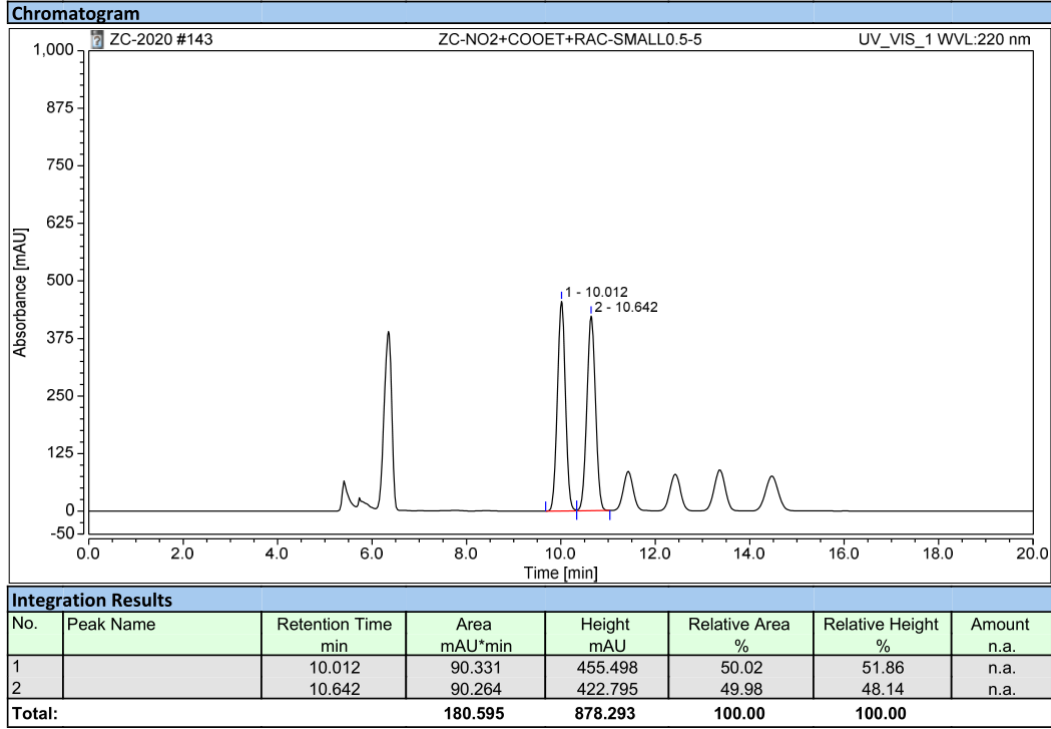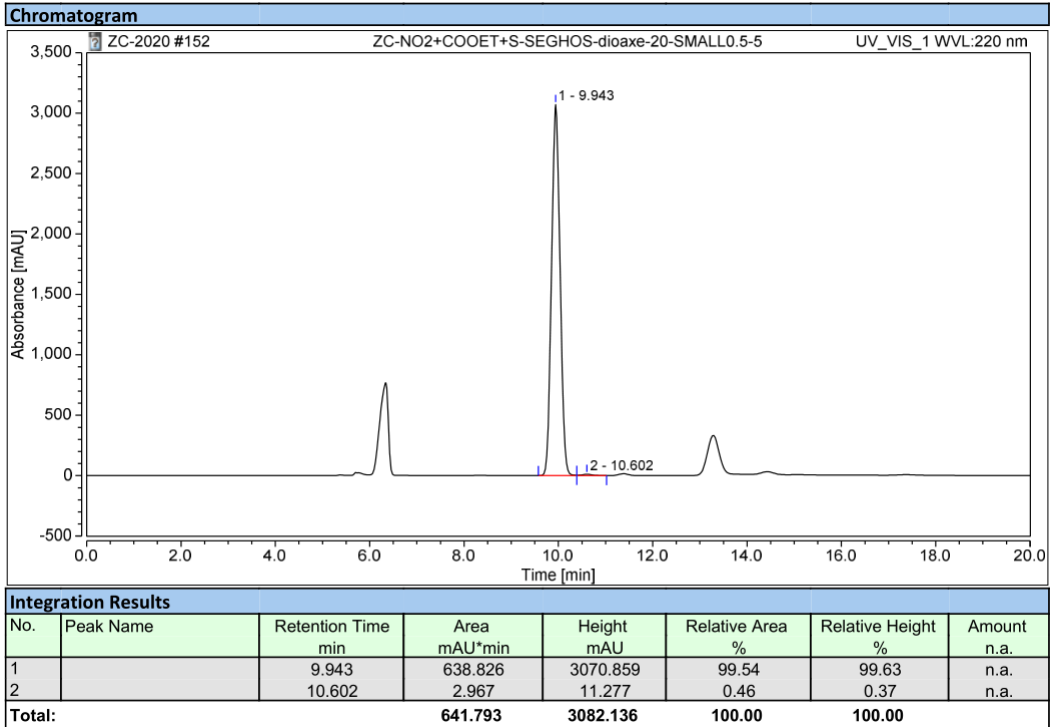

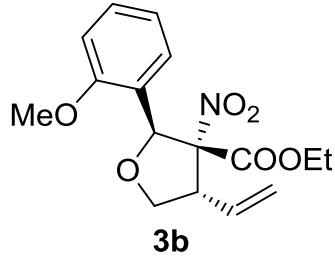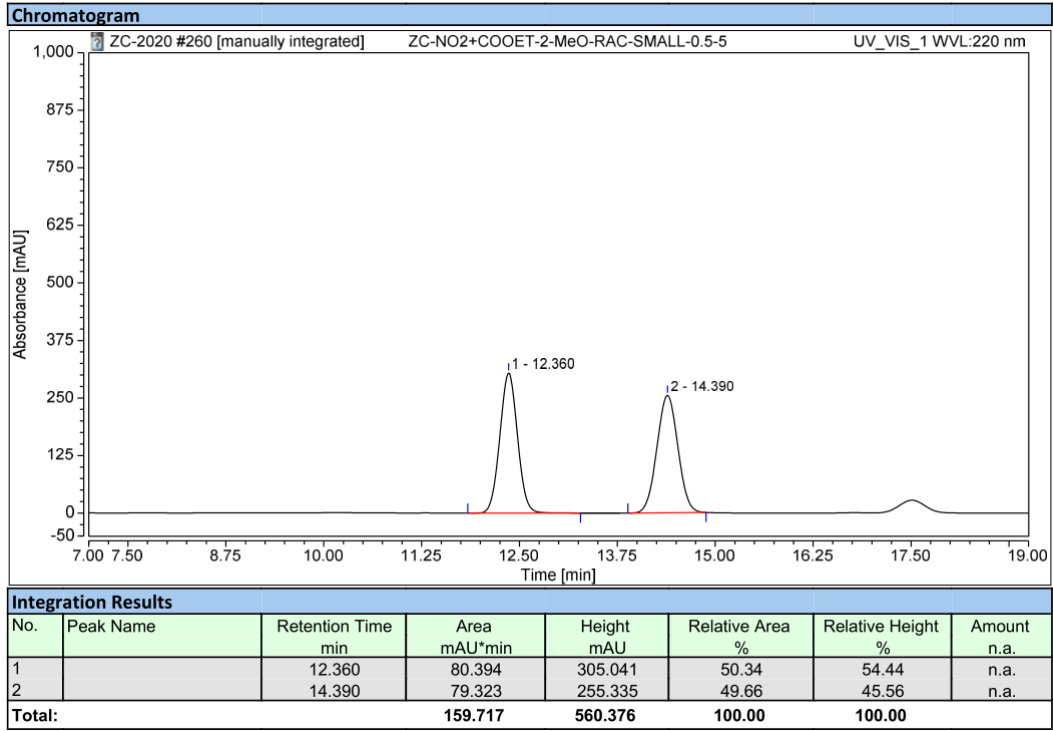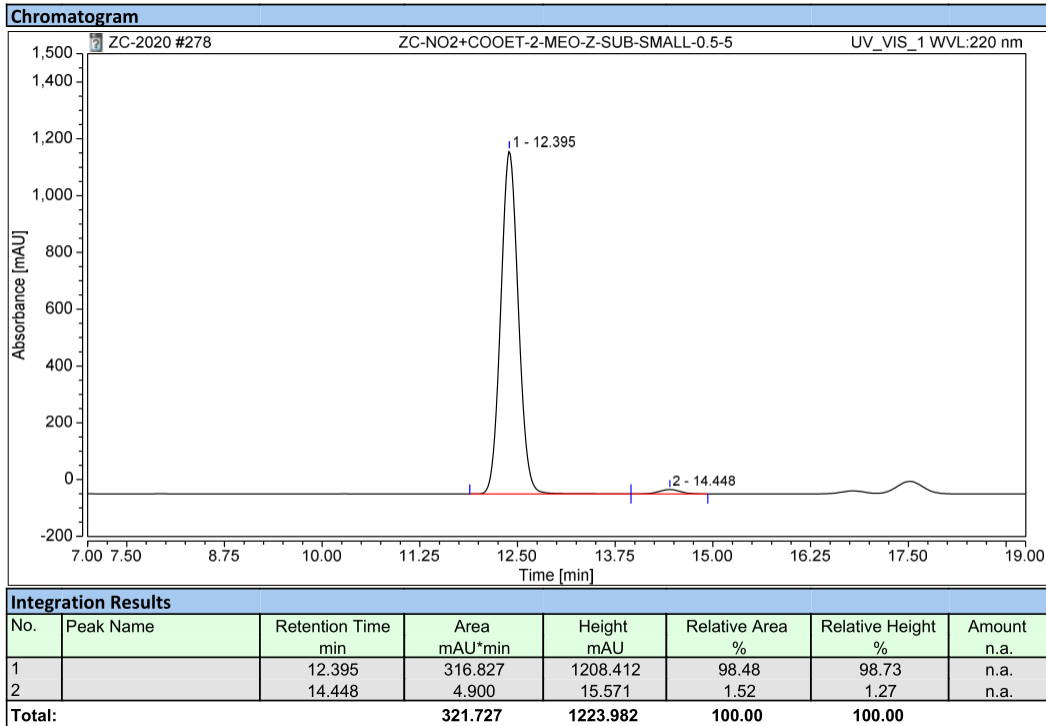



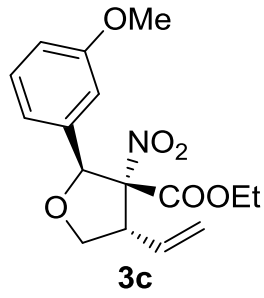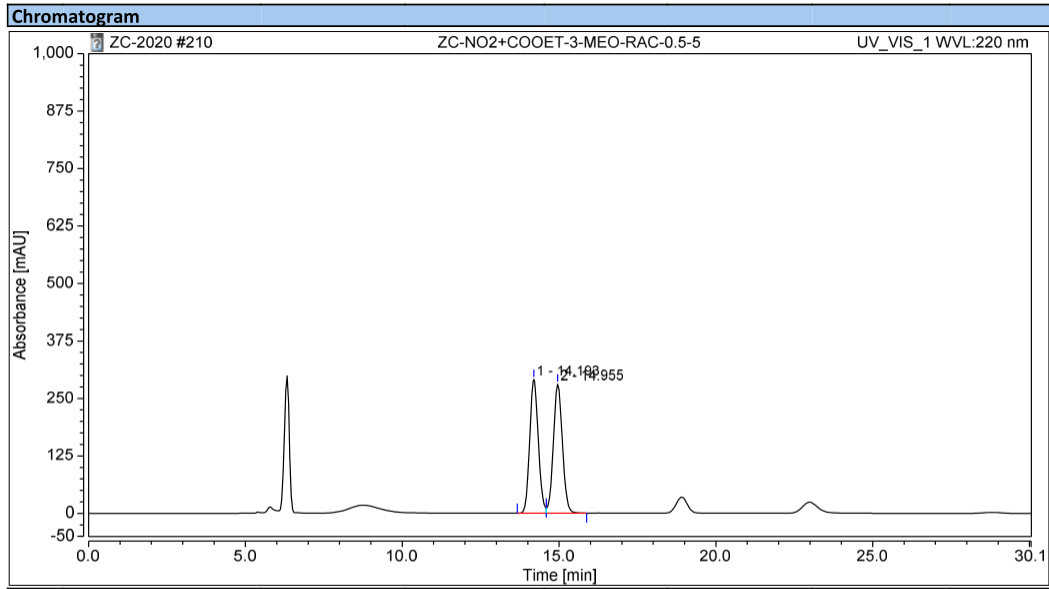

**Integration Results**

| No.           | Peak Name | Retention Time<br>min | Area<br>mAU*min | Height<br>mAU  | Relative Area<br>% | Relative Height<br>% | Amount<br>n.a. |
|---------------|-----------|-----------------------|-----------------|----------------|--------------------|----------------------|----------------|
| 1             |           | 14.193                | 92.412          | 290.976        | 49.61              | 50.88                | n.a.           |
| 2             |           | 14.955                | 93.849          | 280.889        | 50.39              | 49.12                | n.a.           |
| <b>Total:</b> |           |                       | <b>186.261</b>  | <b>571.865</b> | <b>100.00</b>      | <b>100.00</b>        |                |

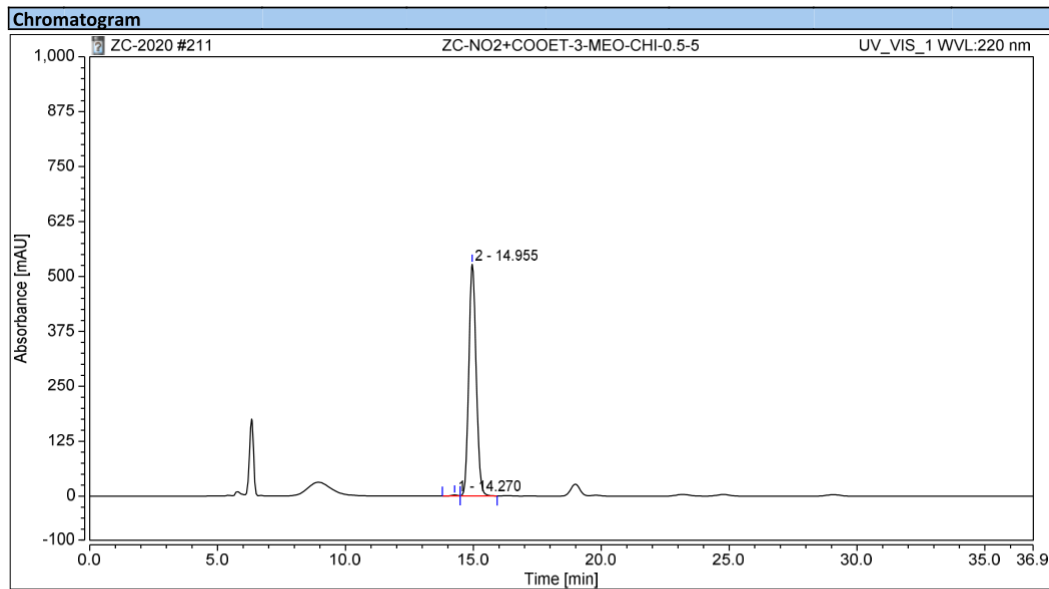

**Integration Results**

| No.           | Peak Name | Retention Time<br>min | Area<br>mAU*min | Height<br>mAU  | Relative Area<br>% | Relative Height<br>% | Amount<br>n.a. |
|---------------|-----------|-----------------------|-----------------|----------------|--------------------|----------------------|----------------|
| 1             |           | 14.270                | 0.760           | 2.507          | 0.43               | 0.47                 | n.a.           |
| 2             |           | 14.955                | 175.519         | 527.315        | 99.57              | 99.53                | n.a.           |
| <b>Total:</b> |           |                       | <b>176.279</b>  | <b>529.822</b> | <b>100.00</b>      | <b>100.00</b>        |                |

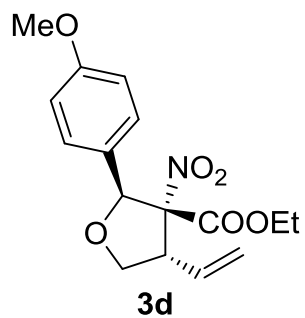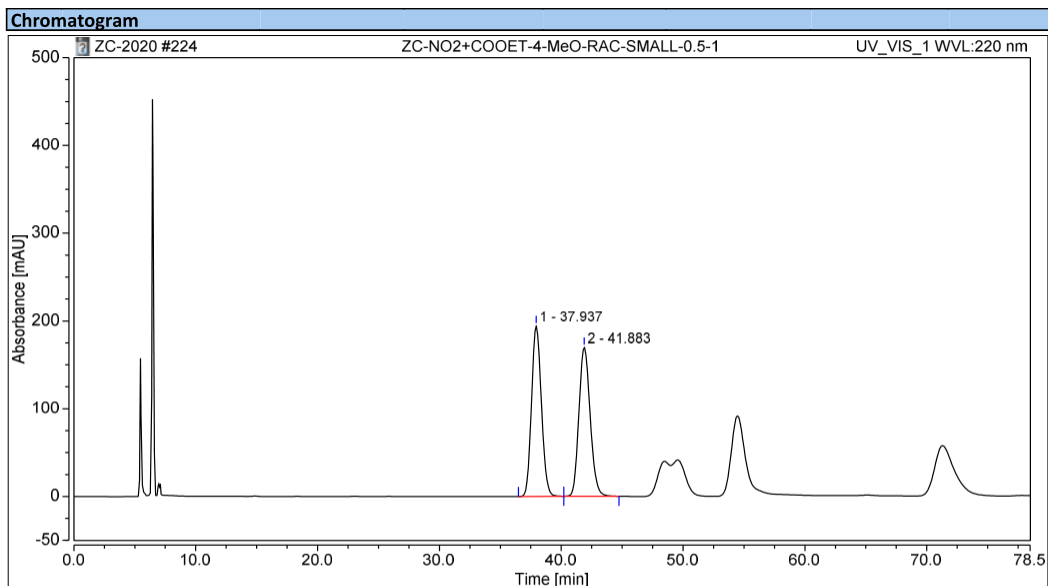

**Integration Results**

| No.           | Peak Name | Retention Time<br>min | Area<br>mAU*min | Height<br>mAU  | Relative Area<br>% | Relative Height<br>% | Amount<br>n.a. |
|---------------|-----------|-----------------------|-----------------|----------------|--------------------|----------------------|----------------|
| 1             |           | 37.937                | 182.521         | 194.804        | 50.05              | 53.37                | n.a.           |
| 2             |           | 41.883                | 182.155         | 170.224        | 49.95              | 46.63                | n.a.           |
| <b>Total:</b> |           |                       | <b>364.676</b>  | <b>365.028</b> | <b>100.00</b>      | <b>100.00</b>        |                |

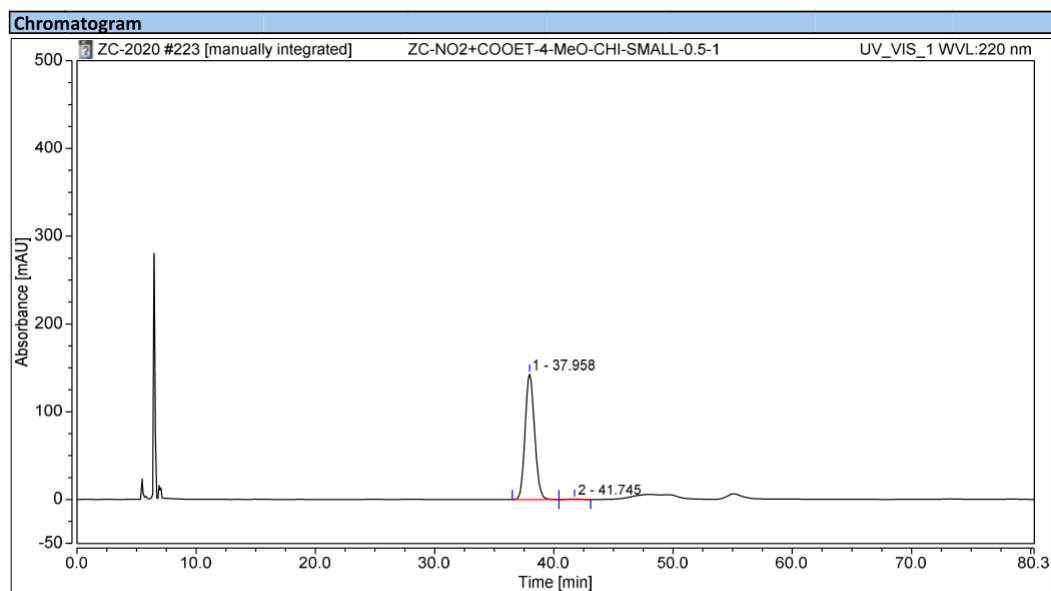

**Integration Results**

| No.           | Peak Name | Retention Time<br>min | Area<br>mAU*min | Height<br>mAU  | Relative Area<br>% | Relative Height<br>% | Amount<br>n.a. |
|---------------|-----------|-----------------------|-----------------|----------------|--------------------|----------------------|----------------|
| 1             |           | 37.958                | 132.280         | 142.960        | 99.35              | 99.52                | n.a.           |
| 2             |           | 41.745                | 0.866           | 0.683          | 0.65               | 0.48                 | n.a.           |
| <b>Total:</b> |           |                       | <b>133.146</b>  | <b>143.642</b> | <b>100.00</b>      | <b>100.00</b>        |                |

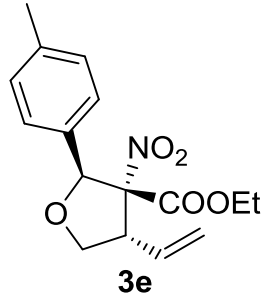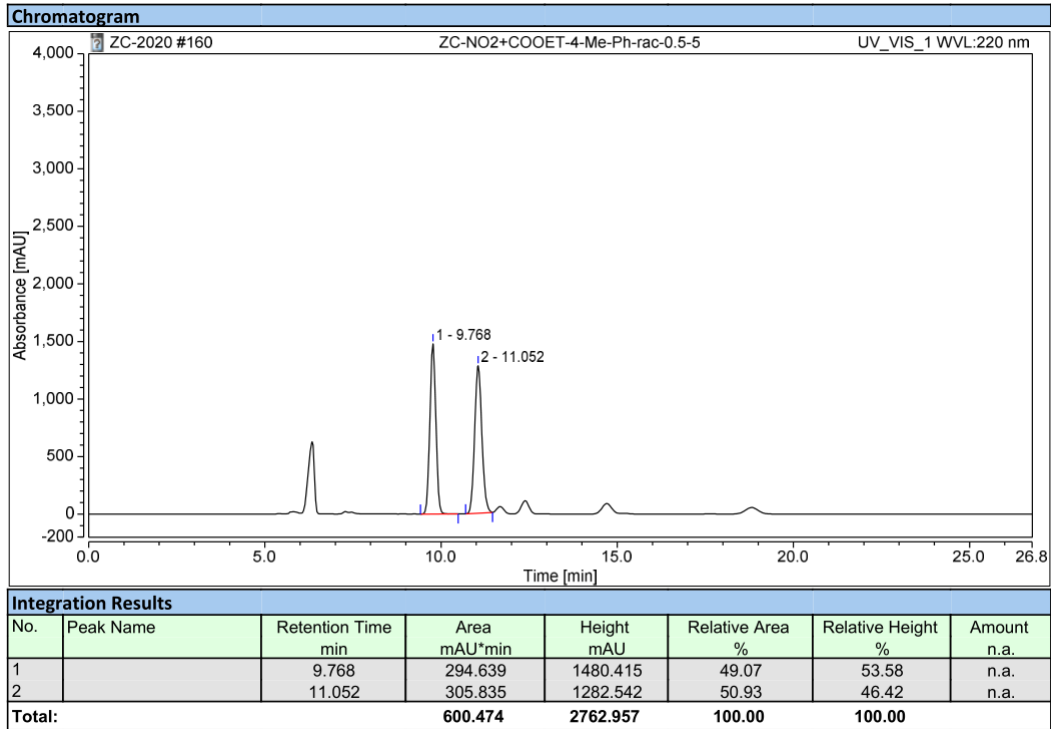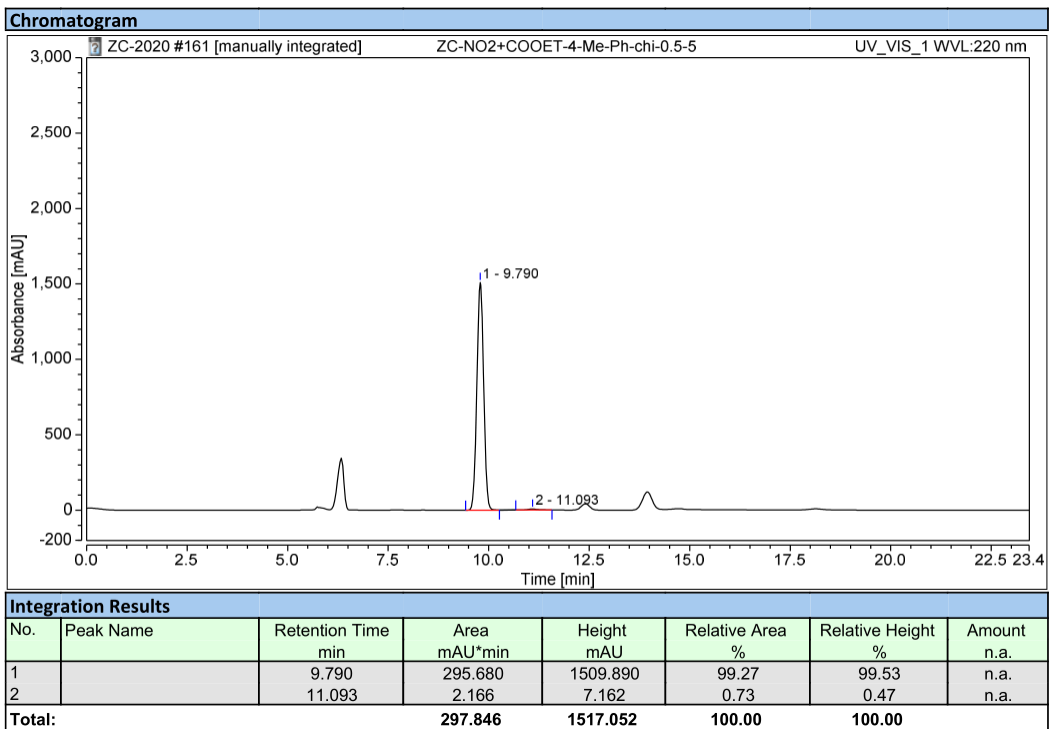

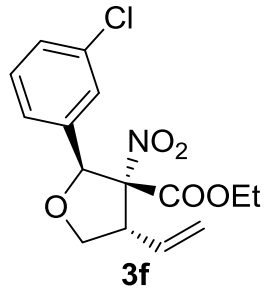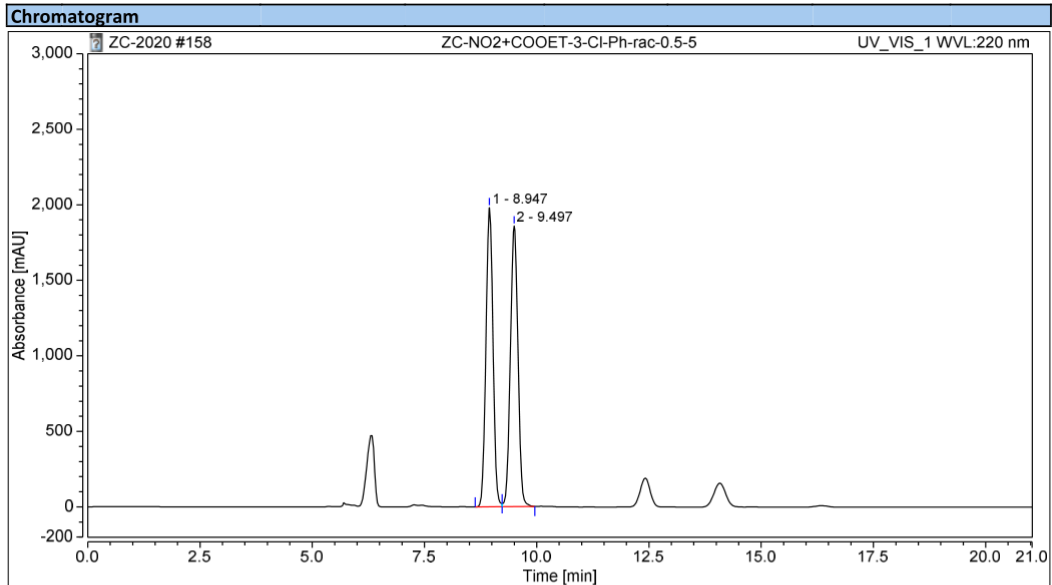

**Integration Results**

| No.           | Peak Name | Retention Time<br>min | Area<br>mAU*min | Height<br>mAU   | Relative Area<br>% | Relative Height<br>% | Amount<br>n.a. |
|---------------|-----------|-----------------------|-----------------|-----------------|--------------------|----------------------|----------------|
| 1             |           | 8.947                 | 361.061         | 1980.926        | 49.80              | 51.58                | n.a.           |
| 2             |           | 9.497                 | 363.994         | 1859.239        | 50.20              | 48.42                | n.a.           |
| <b>Total:</b> |           |                       | <b>725.056</b>  | <b>3840.165</b> | <b>100.00</b>      | <b>100.00</b>        |                |

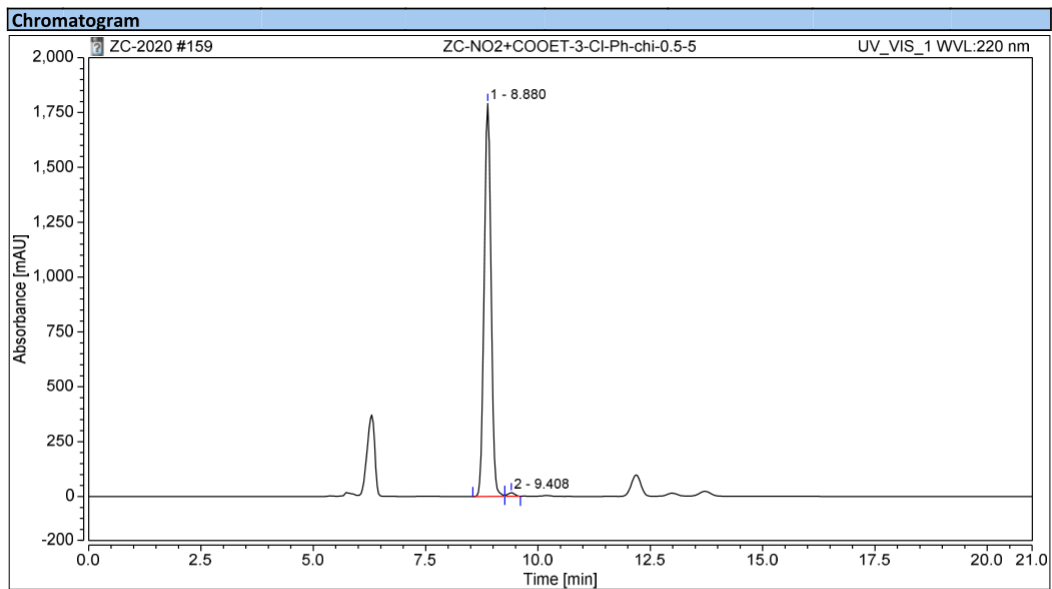

**Integration Results**

| No.           | Peak Name | Retention Time<br>min | Area<br>mAU*min | Height<br>mAU   | Relative Area<br>% | Relative Height<br>% | Amount<br>n.a. |
|---------------|-----------|-----------------------|-----------------|-----------------|--------------------|----------------------|----------------|
| 1             |           | 8.880                 | 318.100         | 1791.437        | 99.12              | 99.12                | n.a.           |
| 2             |           | 9.408                 | 2.834           | 15.919          | 0.88               | 0.88                 | n.a.           |
| <b>Total:</b> |           |                       | <b>320.933</b>  | <b>1807.356</b> | <b>100.00</b>      | <b>100.00</b>        |                |

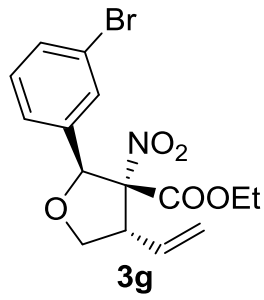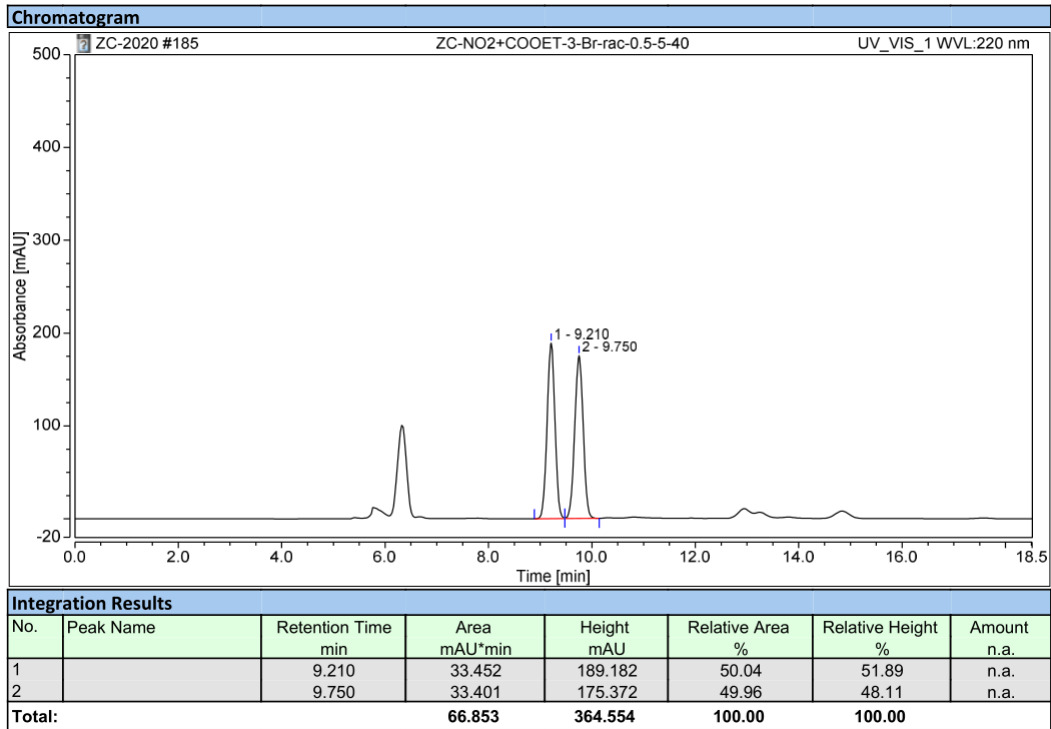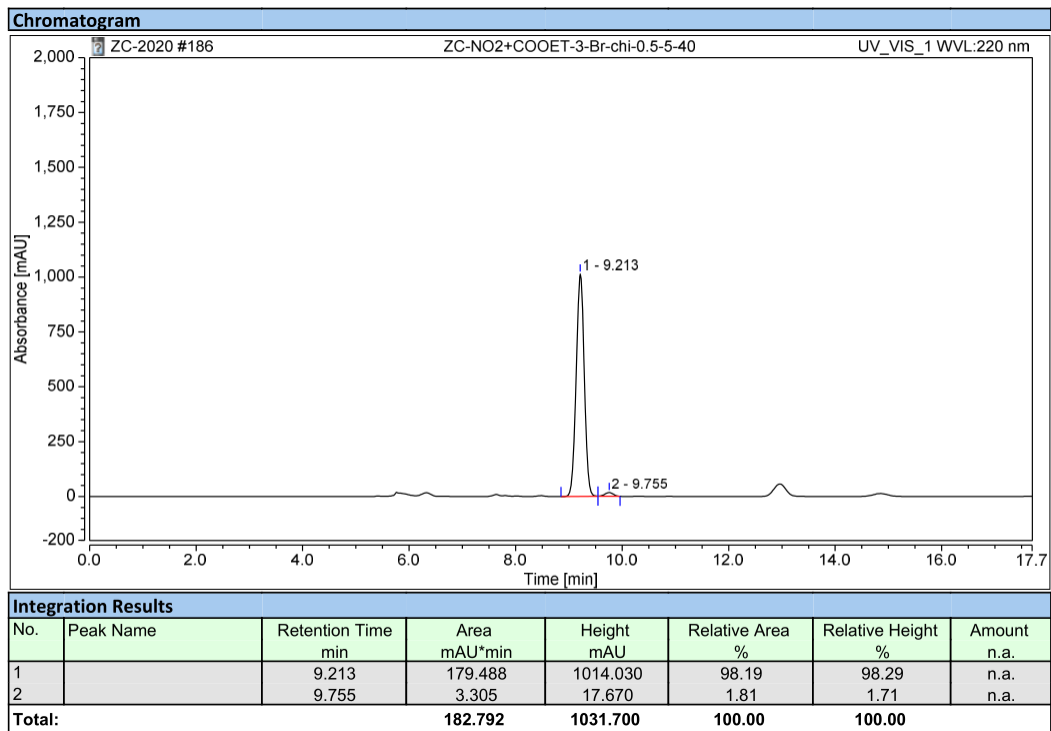

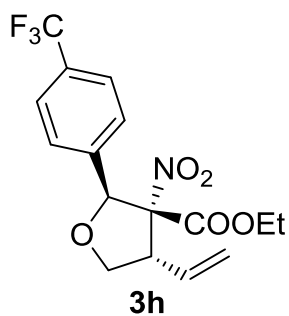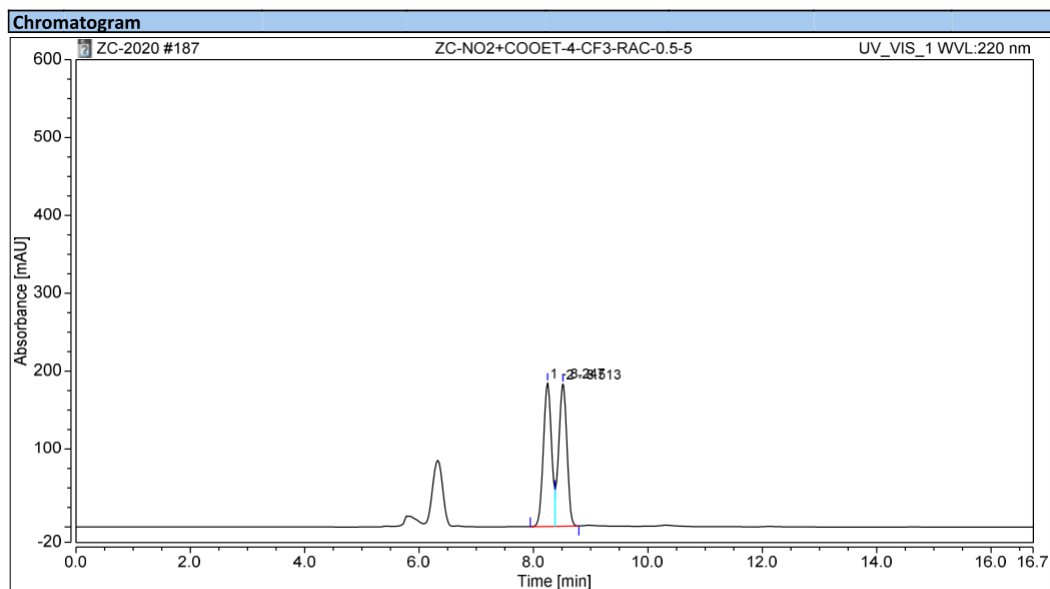

**Integration Results**

| No.           | Peak Name | Retention Time min | Area mAU*min  | Height mAU     | Relative Area % | Relative Height % | Amount |
|---------------|-----------|--------------------|---------------|----------------|-----------------|-------------------|--------|
| 1             |           | 8.247              | 30.479        | 184.856        | 50.05           | 50.25             | n.a.   |
| 2             |           | 8.513              | 30.421        | 183.015        | 49.95           | 49.75             | n.a.   |
| <b>Total:</b> |           |                    | <b>60.900</b> | <b>367.871</b> | <b>100.00</b>   | <b>100.00</b>     |        |

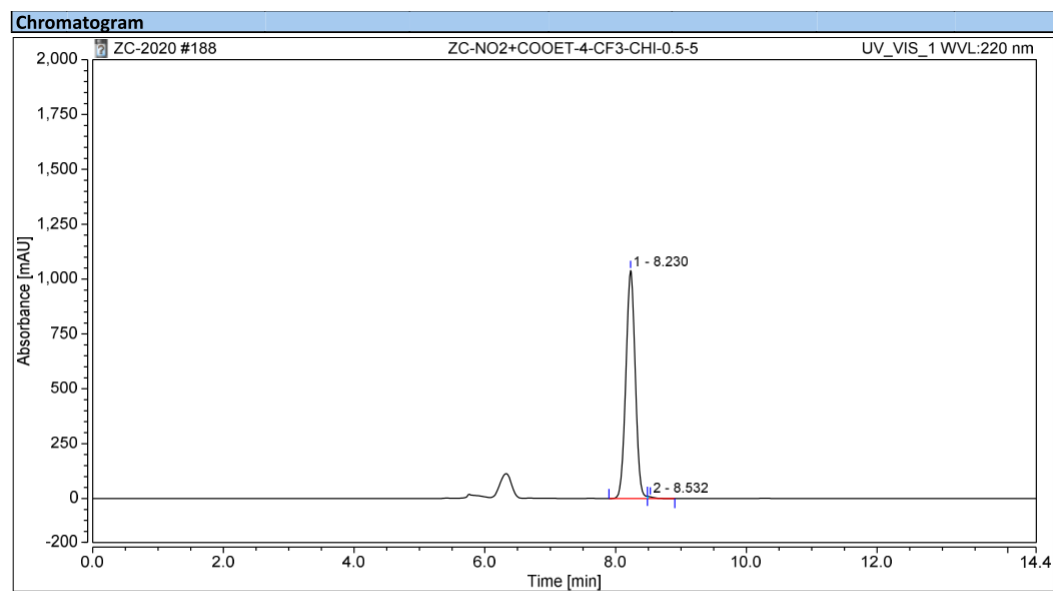

**Integration Results**

| No.           | Peak Name | Retention Time min | Area mAU*min   | Height mAU      | Relative Area % | Relative Height % | Amount |
|---------------|-----------|--------------------|----------------|-----------------|-----------------|-------------------|--------|
| 1             |           | 8.230              | 173.078        | 1038.844        | 99.50           | 99.29             | n.a.   |
| 2             |           | 8.532              | 0.877          | 7.475           | 0.50            | 0.71              | n.a.   |
| <b>Total:</b> |           |                    | <b>173.955</b> | <b>1046.320</b> | <b>100.00</b>   | <b>100.00</b>     |        |

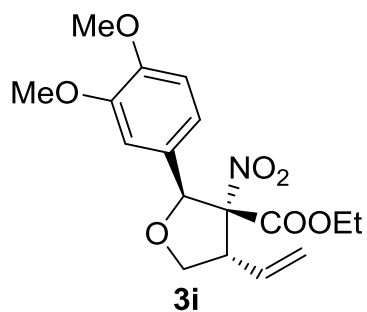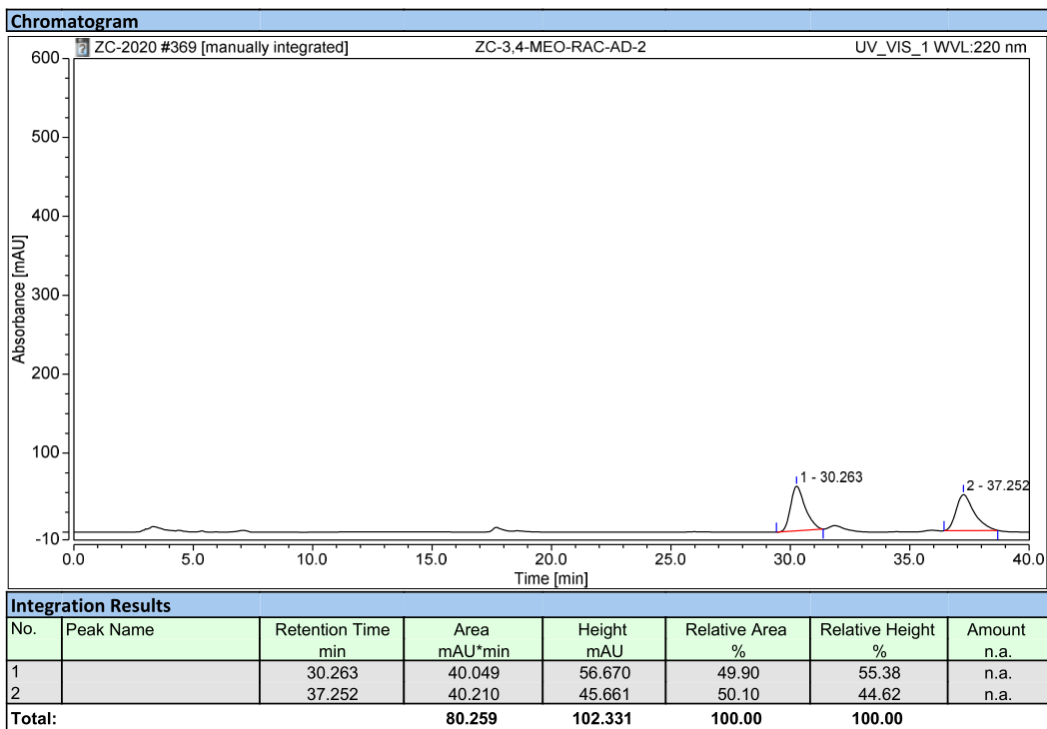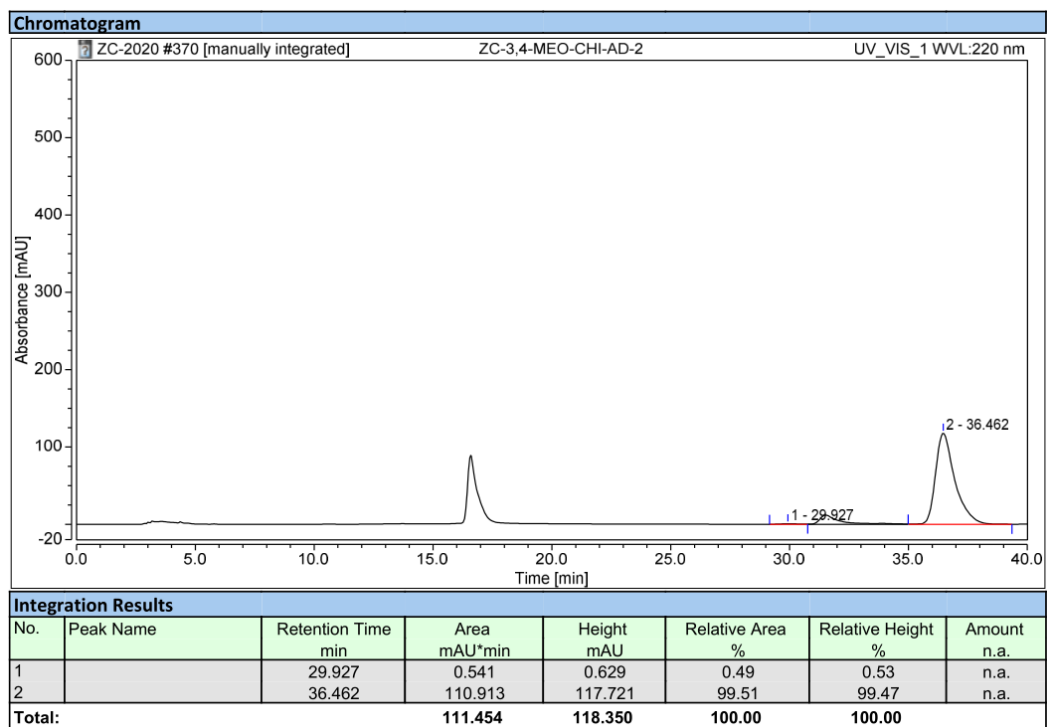

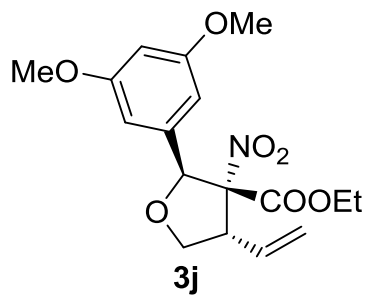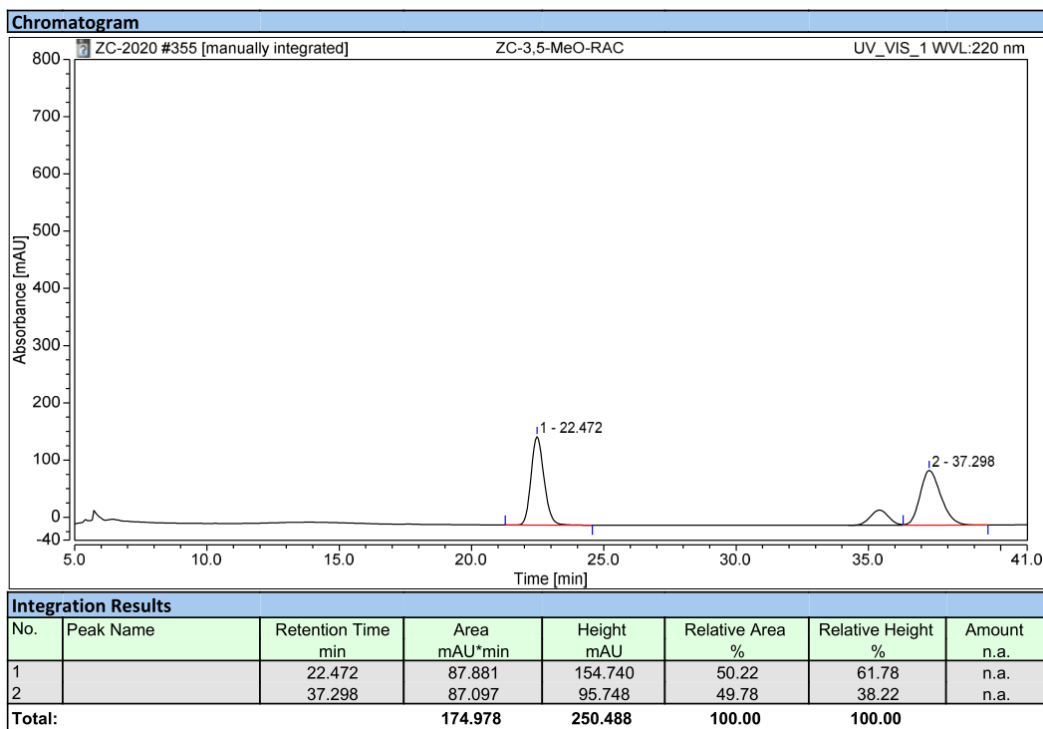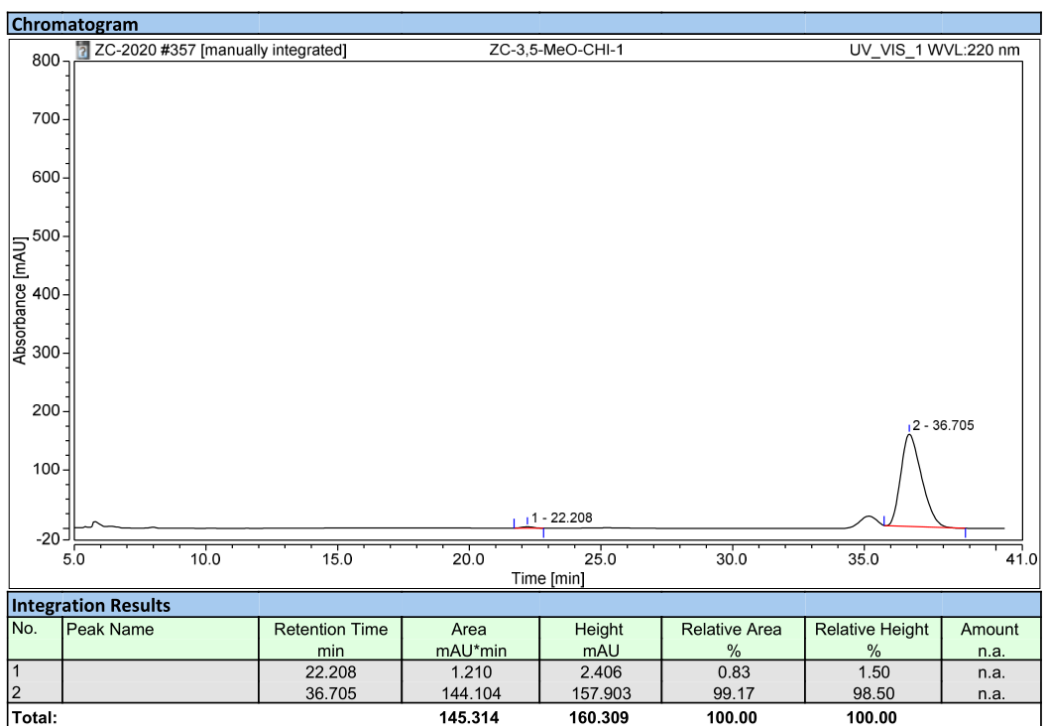



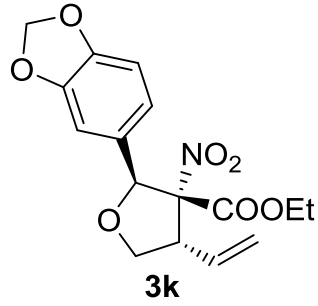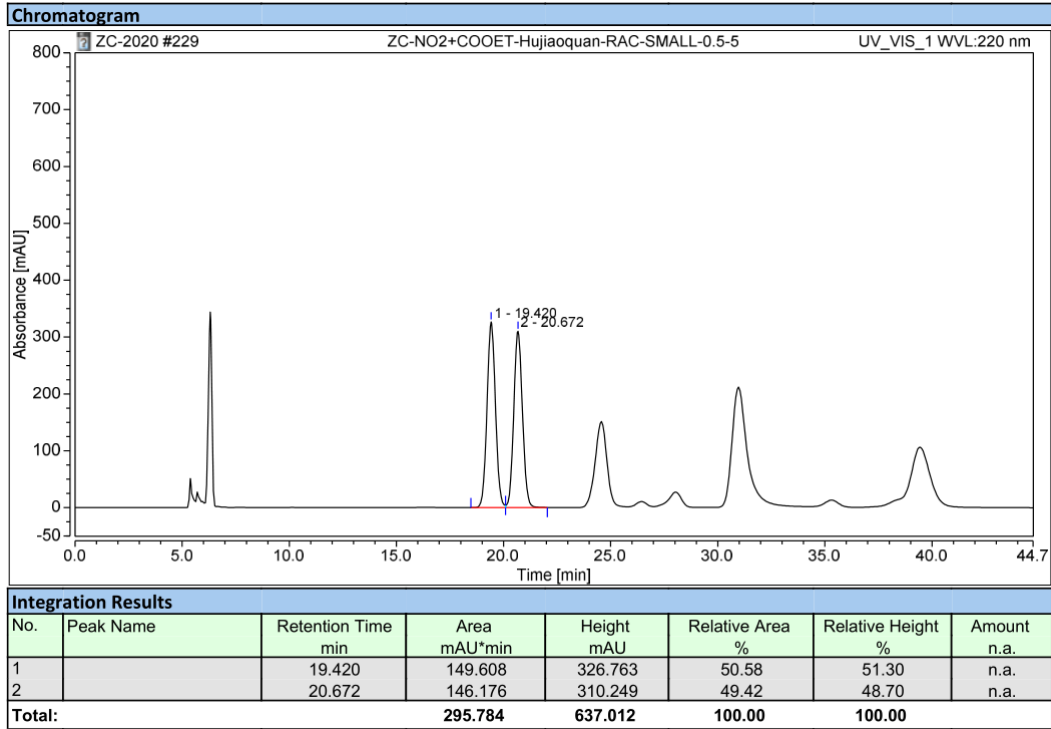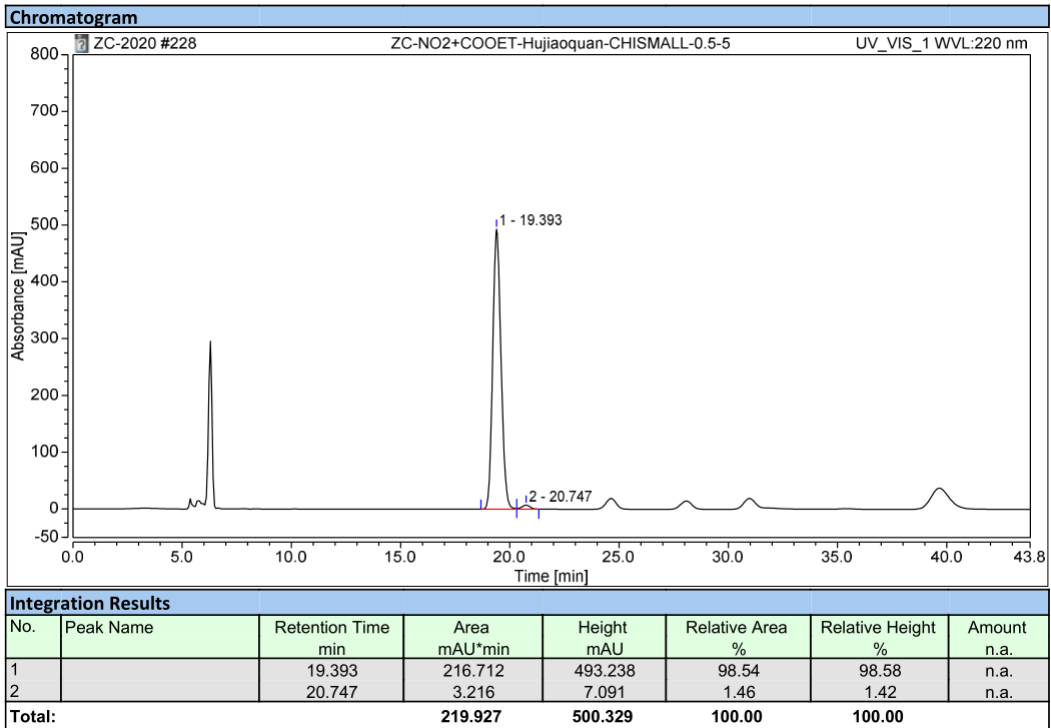

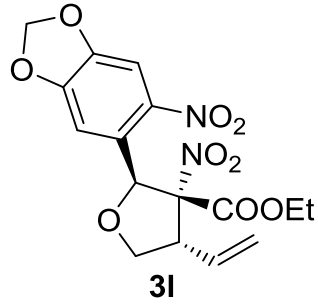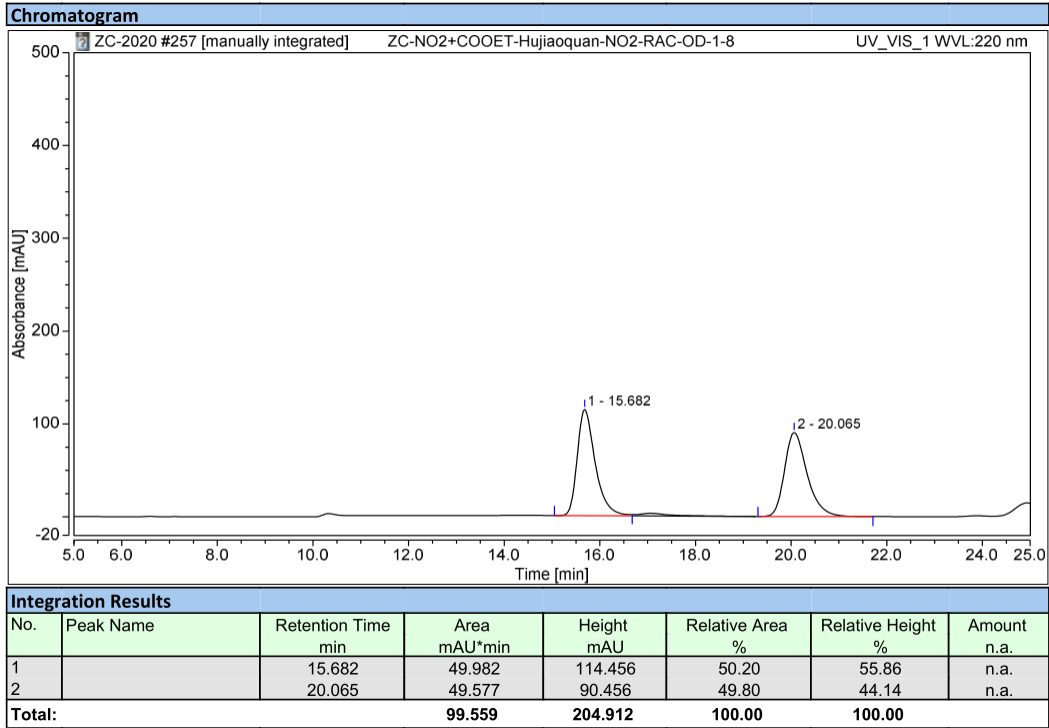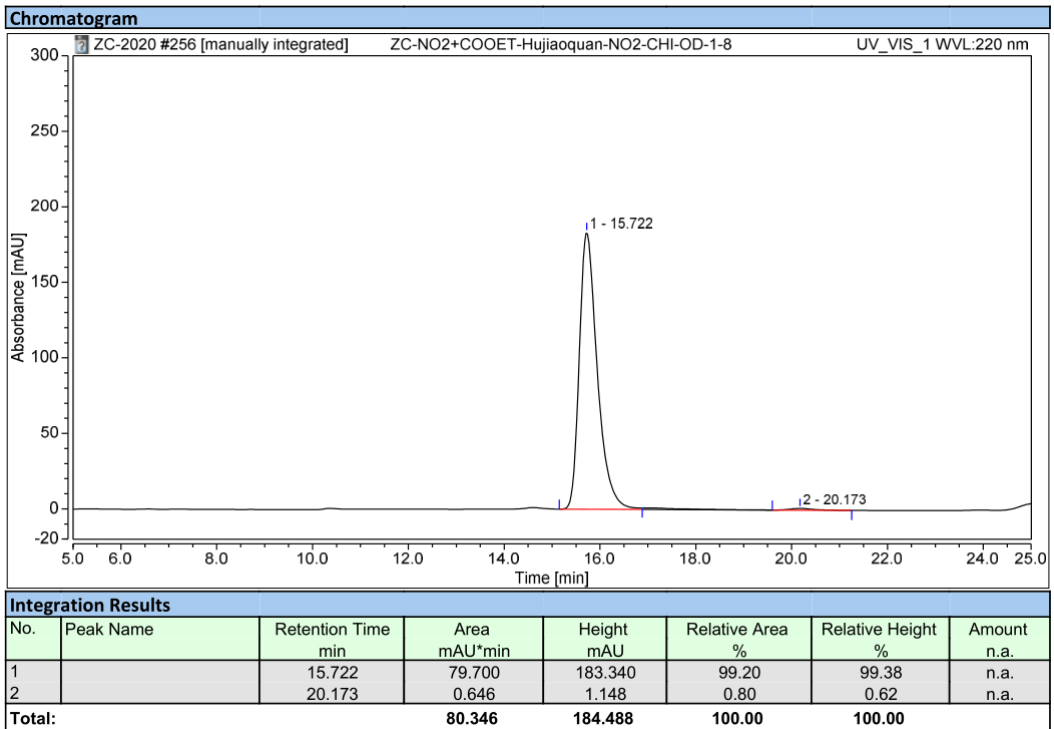

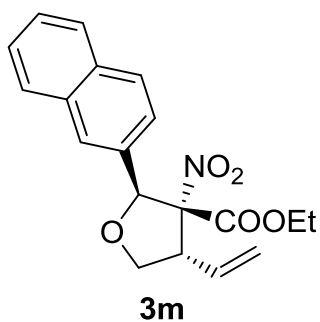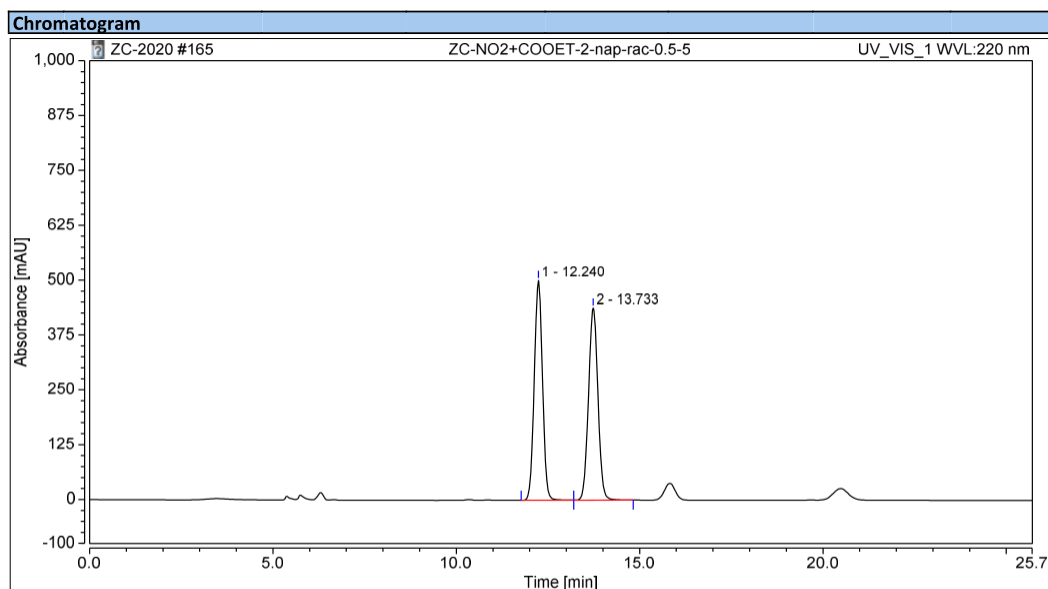

**Integration Results**

| No.           | Peak Name | Retention Time<br>min | Area<br>mAU*min | Height<br>mAU  | Relative Area<br>% | Relative Height<br>% | Amount<br>n.a. |
|---------------|-----------|-----------------------|-----------------|----------------|--------------------|----------------------|----------------|
| 1             |           | 12.240                | 130.704         | 500.929        | 50.01              | 53.35                | n.a.           |
| 2             |           | 13.733                | 130.664         | 438.060        | 49.99              | 46.65                | n.a.           |
| <b>Total:</b> |           |                       | <b>261.368</b>  | <b>938.990</b> | <b>100.00</b>      | <b>100.00</b>        |                |

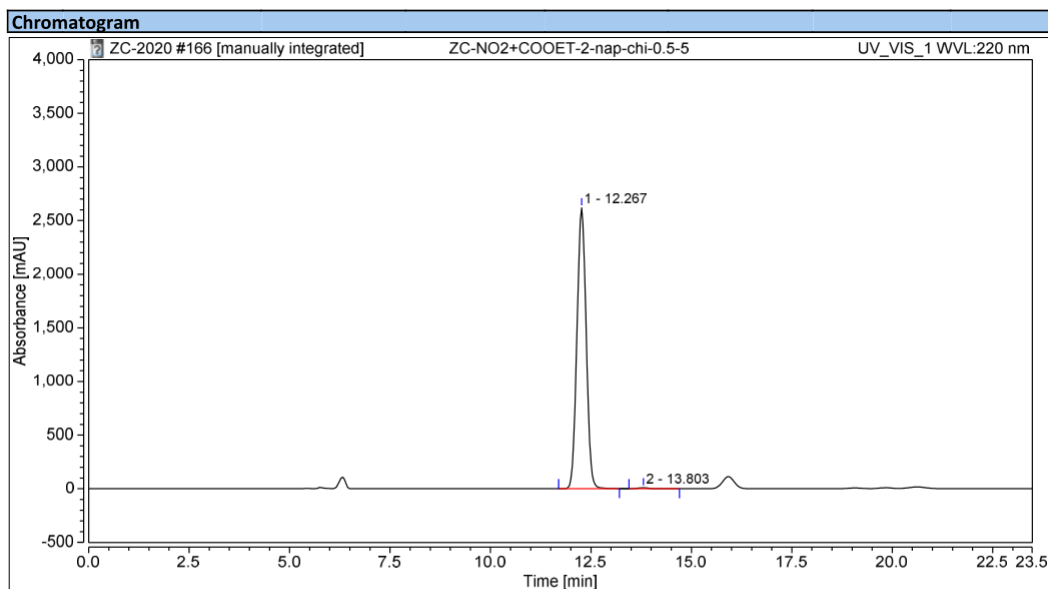

**Integration Results**

| No.           | Peak Name | Retention Time<br>min | Area<br>mAU*min | Height<br>mAU   | Relative Area<br>% | Relative Height<br>% | Amount<br>n.a. |
|---------------|-----------|-----------------------|-----------------|-----------------|--------------------|----------------------|----------------|
| 1             |           | 12.267                | 695.577         | 2620.383        | 99.57              | 99.65                | n.a.           |
| 2             |           | 13.803                | 3.027           | 9.320           | 0.43               | 0.35                 | n.a.           |
| <b>Total:</b> |           |                       | <b>698.604</b>  | <b>2629.702</b> | <b>100.00</b>      | <b>100.00</b>        |                |

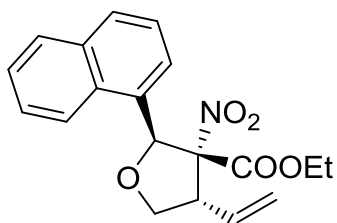

**3n**

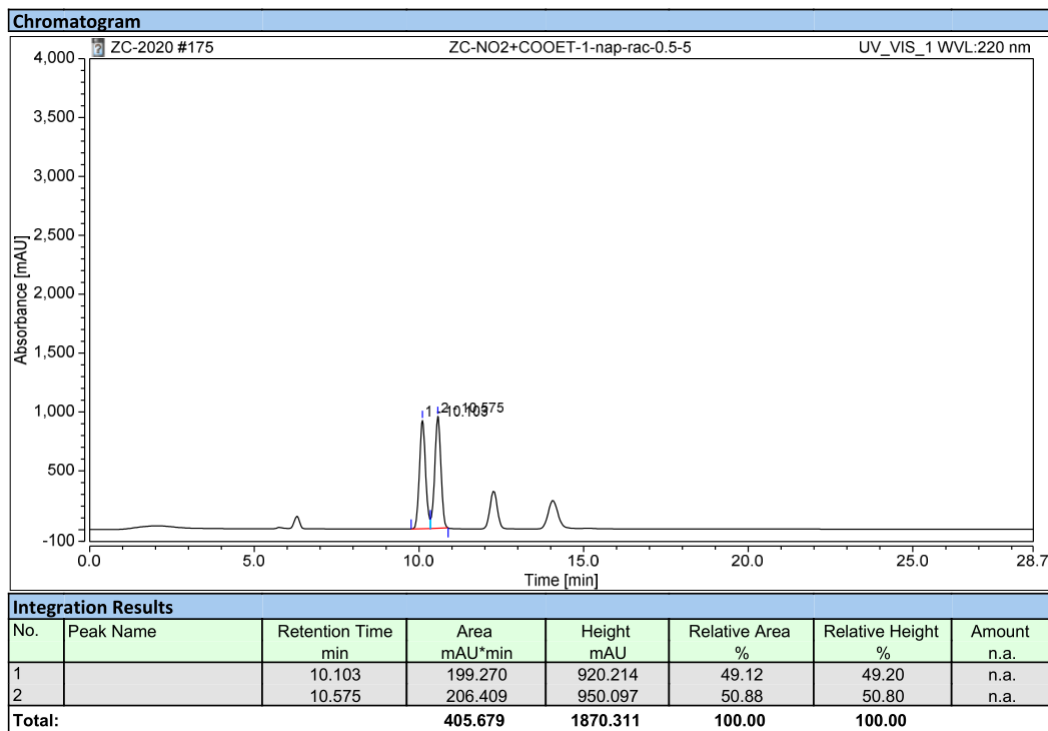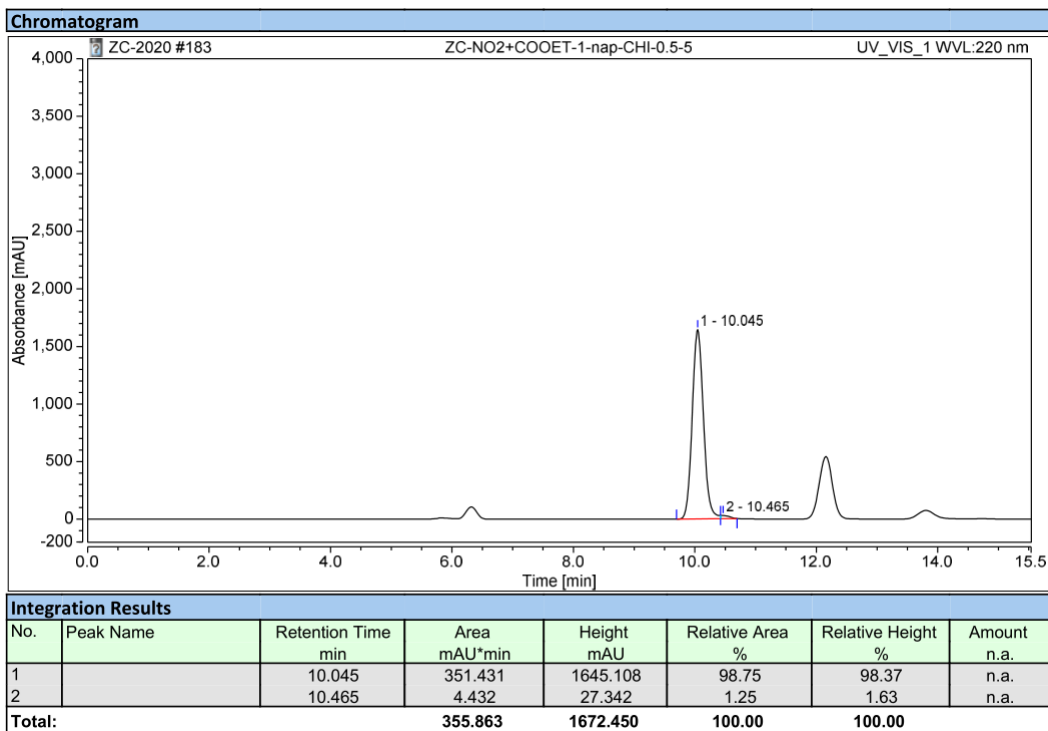

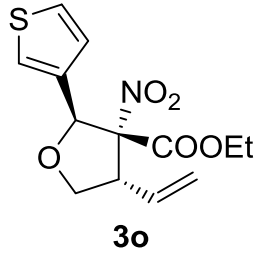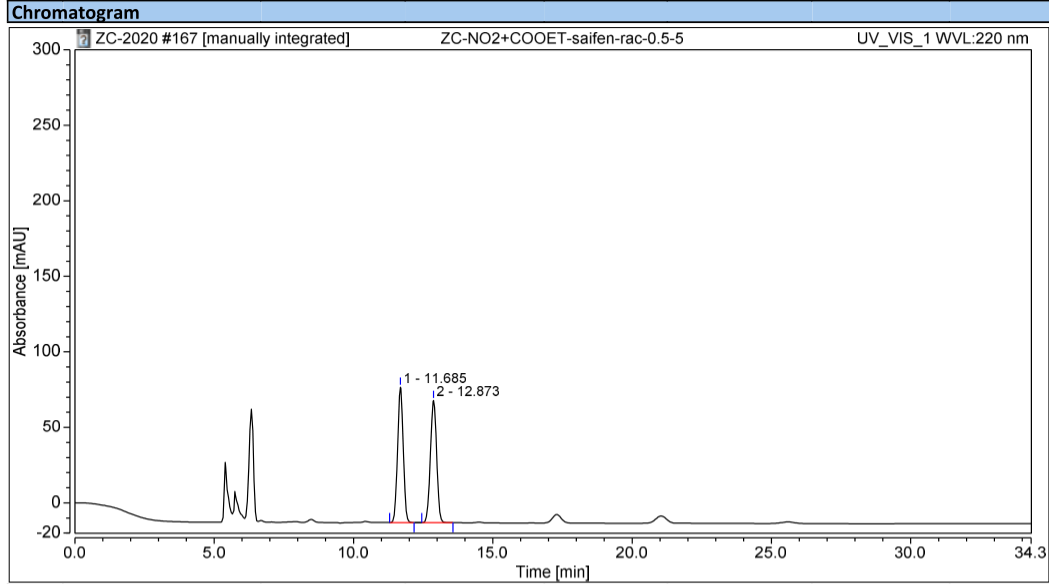

**Integration Results**

| No.           | Peak Name | Retention Time<br>min | Area<br>mAU*min | Height<br>mAU  | Relative Area<br>% | Relative Height<br>% | Amount<br>n.a. |
|---------------|-----------|-----------------------|-----------------|----------------|--------------------|----------------------|----------------|
| 1             |           | 11.685                | 21.198          | 89.711         | 50.02              | 52.57                | n.a.           |
| 2             |           | 12.873                | 21.179          | 80.949         | 49.98              | 47.43                | n.a.           |
| <b>Total:</b> |           |                       | <b>42.377</b>   | <b>170.661</b> | <b>100.00</b>      | <b>100.00</b>        |                |

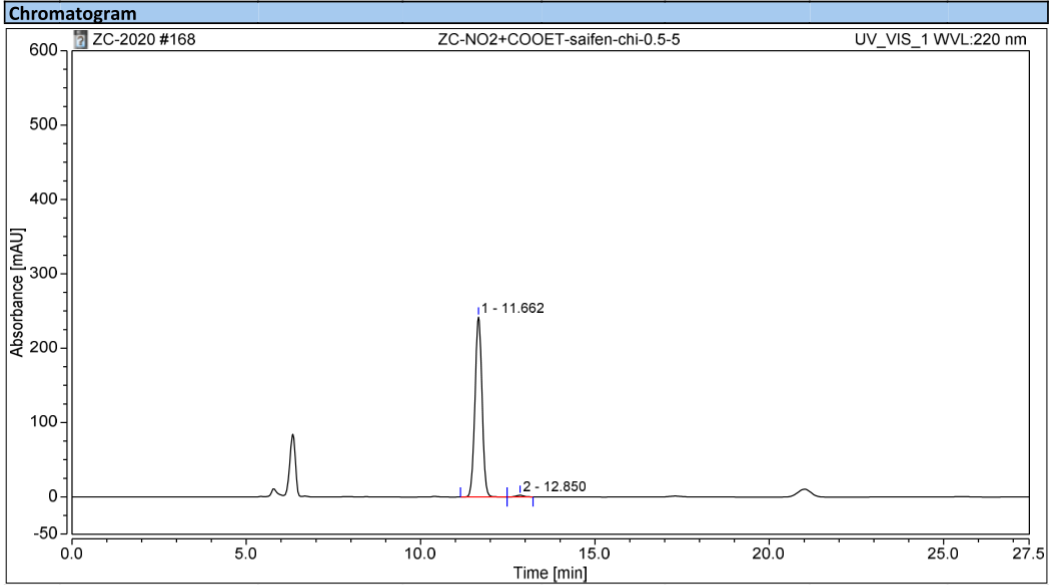

**Integration Results**

| No.           | Peak Name | Retention Time<br>min | Area<br>mAU*min | Height<br>mAU  | Relative Area<br>% | Relative Height<br>% | Amount<br>n.a. |
|---------------|-----------|-----------------------|-----------------|----------------|--------------------|----------------------|----------------|
| 1             |           | 11.662                | 56.960          | 242.002        | 99.03              | 99.12                | n.a.           |
| 2             |           | 12.850                | 0.561           | 2.149          | 0.97               | 0.88                 | n.a.           |
| <b>Total:</b> |           |                       | <b>57.521</b>   | <b>244.151</b> | <b>100.00</b>      | <b>100.00</b>        |                |

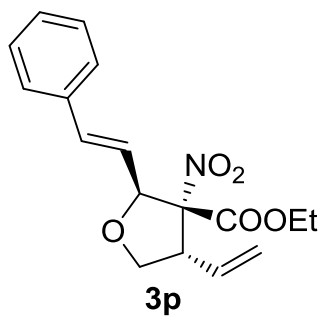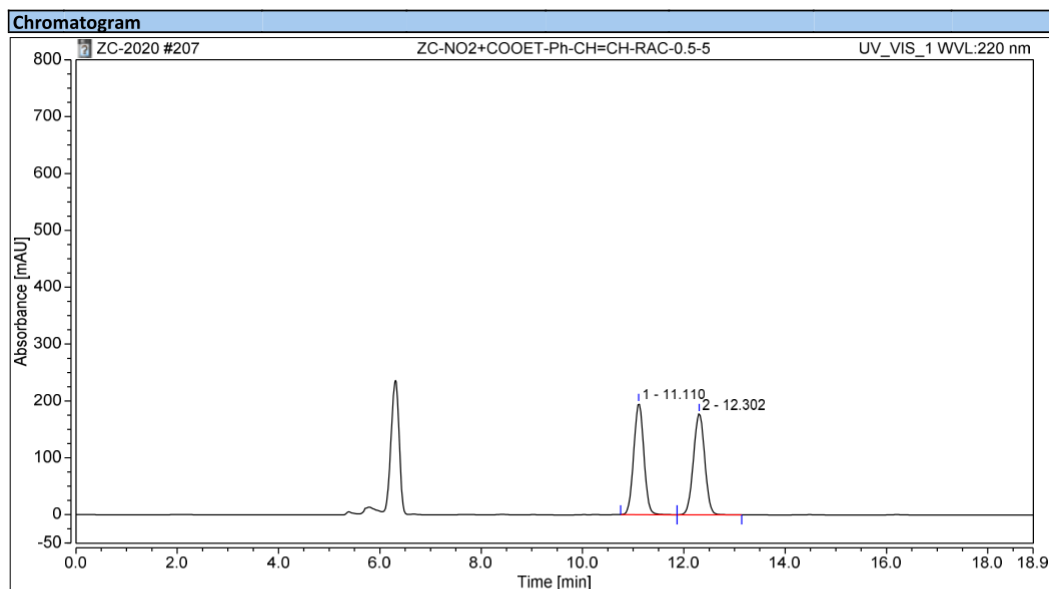

**Integration Results**

| No.           | Peak Name | Retention Time<br>min | Area<br>mAU*min | Height<br>mAU  | Relative Area<br>% | Relative Height<br>% | Amount |
|---------------|-----------|-----------------------|-----------------|----------------|--------------------|----------------------|--------|
| 1             |           | 11.110                | 45.665          | 195.972        | 49.78              | 52.40                | n.a.   |
| 2             |           | 12.302                | 46.072          | 178.022        | 50.22              | 47.60                | n.a.   |
| <b>Total:</b> |           |                       | <b>91.737</b>   | <b>373.995</b> | <b>100.00</b>      | <b>100.00</b>        |        |

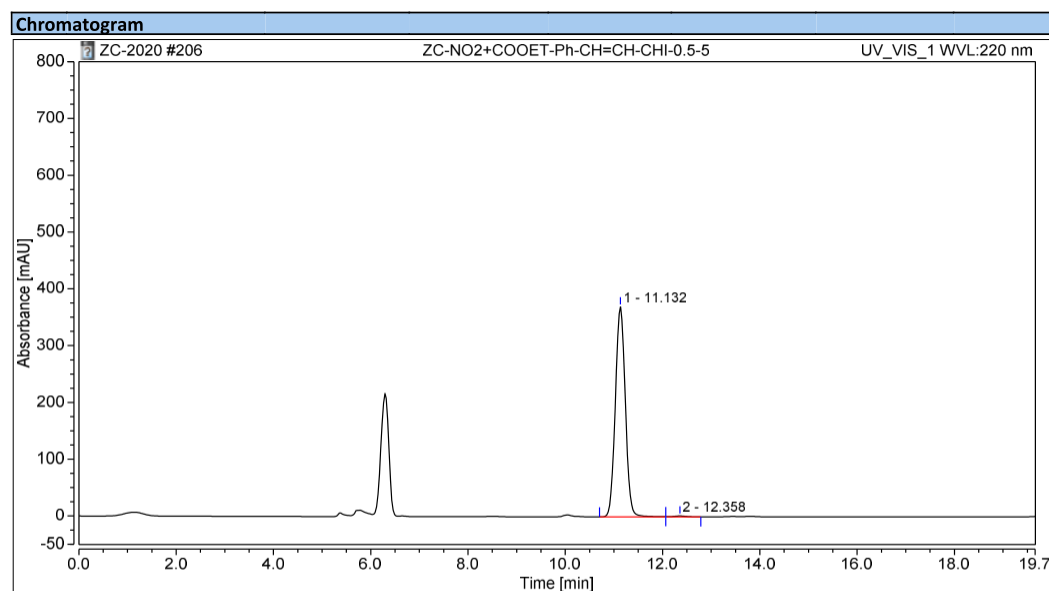

**Integration Results**

| No.           | Peak Name | Retention Time<br>min | Area<br>mAU*min | Height<br>mAU  | Relative Area<br>% | Relative Height<br>% | Amount |
|---------------|-----------|-----------------------|-----------------|----------------|--------------------|----------------------|--------|
| 1             |           | 11.132                | 87.759          | 369.953        | 99.50              | 99.59                | n.a.   |
| 2             |           | 12.358                | 0.437           | 1.535          | 0.50               | 0.41                 | n.a.   |
| <b>Total:</b> |           |                       | <b>88.196</b>   | <b>371.488</b> | <b>100.00</b>      | <b>100.00</b>        |        |

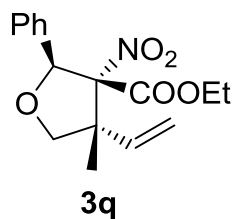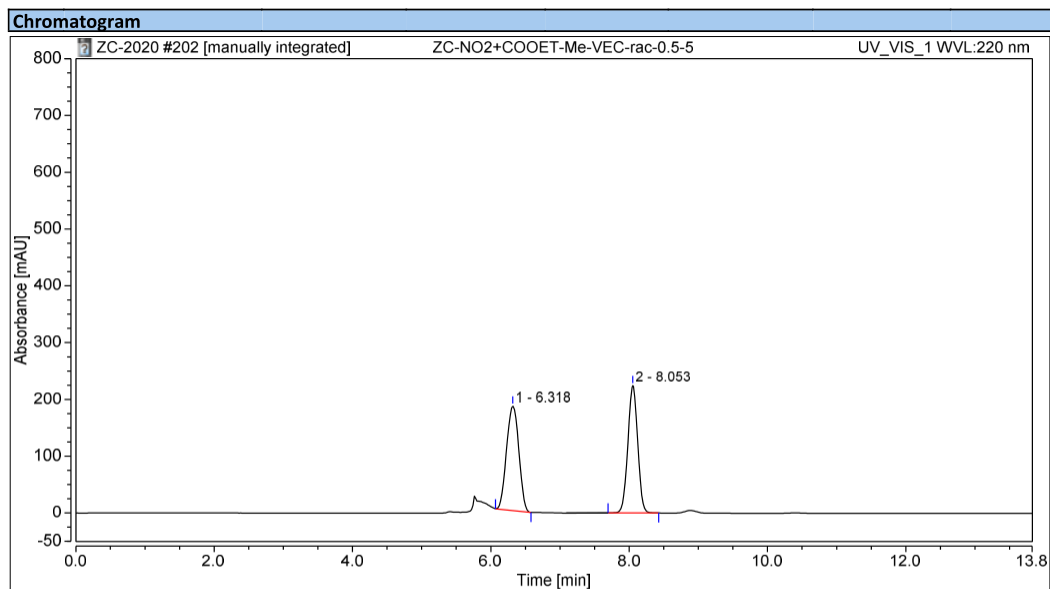

**Integration Results**

| No.           | Peak Name | Retention Time<br>min | Area<br>mAU*min | Height<br>mAU  | Relative Area<br>% | Relative Height<br>% | Amount<br>n.a. |
|---------------|-----------|-----------------------|-----------------|----------------|--------------------|----------------------|----------------|
| 1             |           | 6.318                 | 37.798          | 184.011        | 50.53              | 45.04                | n.a.           |
| 2             |           | 8.053                 | 37.013          | 224.567        | 49.47              | 54.96                | n.a.           |
| <b>Total:</b> |           |                       | <b>74.811</b>   | <b>408.579</b> | <b>100.00</b>      | <b>100.00</b>        |                |

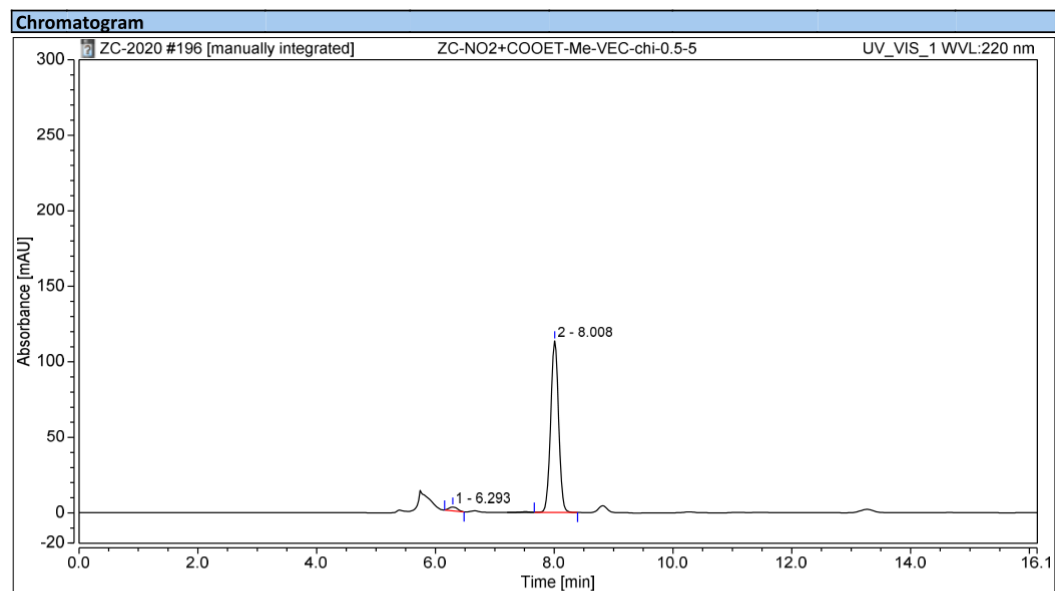

**Integration Results**

| No.           | Peak Name | Retention Time<br>min | Area<br>mAU*min | Height<br>mAU  | Relative Area<br>% | Relative Height<br>% | Amount<br>n.a. |
|---------------|-----------|-----------------------|-----------------|----------------|--------------------|----------------------|----------------|
| 1             |           | 6.293                 | 0.423           | 2.503          | 2.35               | 2.16                 | n.a.           |
| 2             |           | 8.008                 | 17.577          | 113.606        | 97.65              | 97.84                | n.a.           |
| <b>Total:</b> |           |                       | <b>18.000</b>   | <b>116.109</b> | <b>100.00</b>      | <b>100.00</b>        |                |

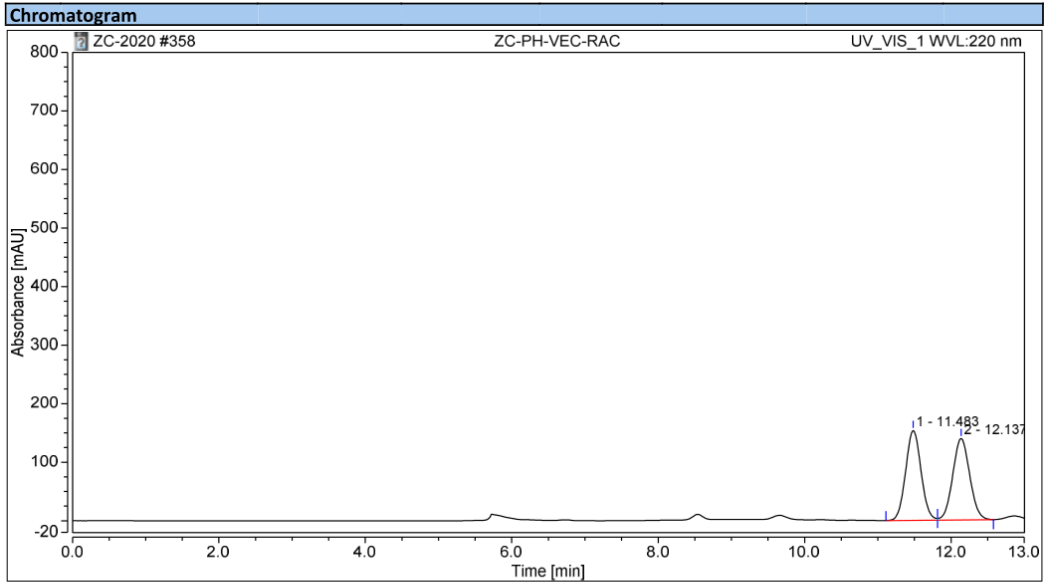

**Integration Results**

| No.           | Peak Name | Retention Time<br>min | Area<br>mAU*min | Height<br>mAU  | Relative Area<br>% | Relative Height<br>% | Amount<br>n.a. |
|---------------|-----------|-----------------------|-----------------|----------------|--------------------|----------------------|----------------|
| 1             |           | 11.483                | 37.442          | 153.639        | 50.05              | 52.45                | n.a.           |
| 2             |           | 12.137                | 37.366          | 139.313        | 49.95              | 47.55                | n.a.           |
| <b>Total:</b> |           |                       | <b>74.808</b>   | <b>292.952</b> | <b>100.00</b>      | <b>100.00</b>        |                |

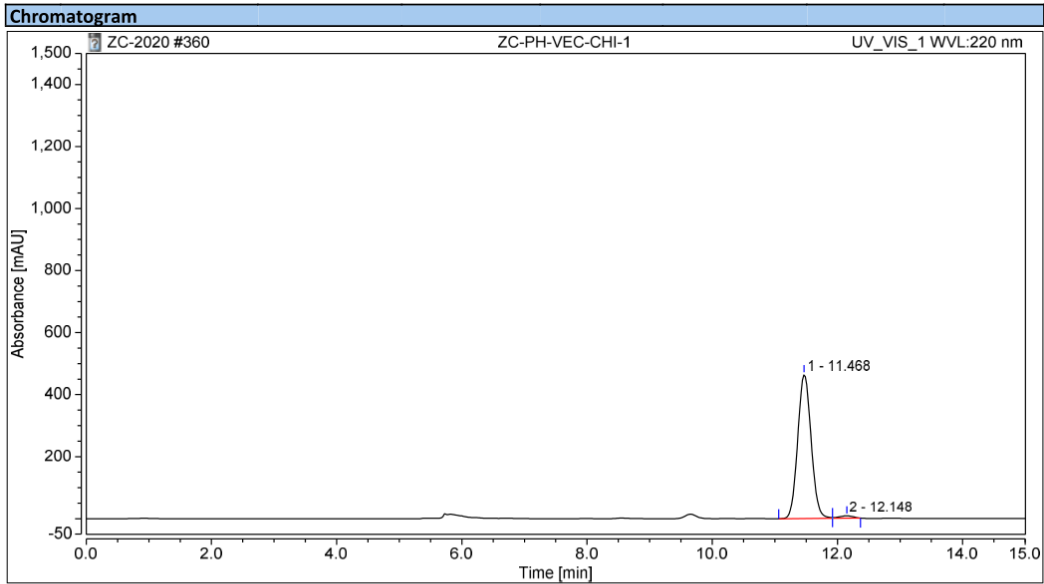

**Integration Results**

| No.           | Peak Name | Retention Time<br>min | Area<br>mAU*min | Height<br>mAU  | Relative Area<br>% | Relative Height<br>% | Amount<br>n.a. |
|---------------|-----------|-----------------------|-----------------|----------------|--------------------|----------------------|----------------|
| 1             |           | 11.468                | 114.667         | 463.667        | 98.29              | 98.37                | n.a.           |
| 2             |           | 12.148                | 1.993           | 7.690          | 1.71               | 1.63                 | n.a.           |
| <b>Total:</b> |           |                       | <b>116.661</b>  | <b>471.357</b> | <b>100.00</b>      | <b>100.00</b>        |                |
